# Supplementary material
Source: MDPI journal article supplement (https://www.mdpi.com/1099-4300/15/8/3065)
Supplement: s1 [file s1]

1  
CY080523 -----GGAATAATTCTATTAAATCAAGAGACCATC  
CY118914 -----TAATTCTATTAAACCATGAAGACTATC  
CY113365 -----TAATTCTATTAAACCATGAAGACTATC  
CY112837 -----TAATTCTATTAAACCATGAAGACTATC  
AJ404626 GCAAAAGCAGGGGAATTACTTAAGTAGCAAAATGGAAACA  
CY087800 -----GGTTATAACCATAGACAACCAAAAGCAAAACA  
CY032261 -----ATG-----  
AF116575 -----ATGGAGGCA  
CY006667 -----GGGAAAAATAAAAGCAACCAAAATGAAAGTA  
CY009604 -----GAAAAATAAAAAACAACCAAAATGAAGGCA  
CY020445 -----AACCAACCAAAATGAAGGCA  
CY045772 -----ATGAAGGCA  
CY009340 -----GAAAAATAAAAAACAACCAAAATGAAAGCA  
CY013271 -----AACCAACCAAAATGAAAGCA  
CY010372 -----GAAAAATAAAAAACAACCAAAATGAAAGCA  
CY021037 -----AAAAATAAAAAACAACCAAAATGAAAGCA  
CY021957 -----ACCGAAATGAAGGCA  
JX046926 -----ATGAAGGCA  
CY049987 -----ATGAAGGCT  
GQ132138.1| -----AAAACAAAAGCAACAAAAATGAAGGCA

41  
CY080523 ATT--GCTTTGAGCTACATTTCTGTCTGGCTCTCGGCCA  
CY118914 ATT--GCTTTGAGCTACATTTCTGTCTGGTTTTCGCTCA  
CY113365 ATT--GCTTTGAGCTACATTTCTGTCTGGTTTTCGCCA  
CY112837 ATT--GCTTTGAGCTACATTTTATGTCTGGTTTTCGCTCA  
AJ404626 ATATCACTAATAACTATACTACTAGT--AGTAACAG-----  
CY087800 ATG--GCCATCAATTTATCTCATTTCTCCTGTTACAG-----  
CY032261 -----GCCATCAATTTATCTCATACTCCTGTTACAG-----  
AF116575 AG--ACTACTGGTCTTGTATGTGC--ATTTCAG-----  
CY006667 AA--ACTACTGGTCTGTTATGTAC--ATTTCAG-----  
CY009604 AG--ACTACTGGTCCTGTTATGTGC--ACTTCAG-----  
CY020445 AG--ACTACTGGTCCTGTTATGTGC--ACTTCAG-----  
CY045772 AG--ACTACTGATCCTGTTGTGTGC--ACTTCAG-----  
CY009340 AG--ACTACTGATCCTGTTATGTGC--ACTTCAG-----  
CY013271 AA--ACTACTGATCCTGTTATGTGC--ACTTCAG-----  
CY010372 AA--ACTACTGGTCCTGTTATGTGC--ACTTCAG-----  
CY021037 AA--ACTACTGGTCCTGTTATGTGC--ACTTCAG-----  
CY021957 AT--ACTATTAGTCTTGTATGTAC--ATTTCAG-----  
JX046926 AT--ACTAGTAGTTCTGCTATATAC--ATTTCAG-----  
CY049987 AT--ACTAGTAGTTCTGCTATATAC--ATTTCAG-----  
GQ132138.1| AT--ACTAGTAGTTCTGCTATATAC--ATTTCAG-----

81  
CY080523 AGACCTTCCAGGAAATGACAACAGCACAGCAACGCTGTGC  
CY118914 AAAACTTCCCGGAAATGACAACAGCACAGCAACGCTGTGC  
CY113365 AAAACTTCCCGGAAATGACAACAGCACAGCAACGCTGTGC  
CY112837 AAAACTTCCCGGAAATGACAACAGCACAGCAACGCTGTGC  
AJ404626 -----CAAGCAATG-----CAGATAAAATCTGC  
CY087800 -----CAGTGAGAG-----GGGACCAGATATGC  
CY032261 -----CAGTGAGGG-----GGGACCAGATATGC  
AF116575 -----CTACAAATG-----CAGACACAATATGT  
CY006667 -----CTACATATG-----CAGACACAATATGT  
CY009604 -----CTACAGATG-----CAGACACAATATGT  
CY020445 -----CTACAGATG-----CAGACACAATATGT  
CY045772 -----CTACAGATG-----CAGACACAATATGT  
CY009340 -----CTACAGATG-----CAGACACAATATGT  
CY013271 -----CCACAGATG-----CAGACACAATATGT  
CY010372 -----CTACAGATG-----CAGACACAATATGT  
CY021037 -----CTACAGATG-----CAGACACAATATGT  
CY021957 -----CCACAAATG-----CAGACACATATGT  
JX046926 -----CCGCAAAATG-----CAGACACATTATGT  
CY049987 -----CCGCAAAATG-----CAGACACATTATGT  
GQ132138.1| -----CCGCAAAATG-----CAGACACATTATGT

121

CY080523 CTGGGACATCATGCGGTG---CCAAACGGAACTAGTGA  
 CY118914 CTTGGGCACCATGCAGTA---CCAAACGGAAACGATAGTGA  
 CY113365 CTGGGACATCATGCAGTG---CCAAACGGAAACGCTAGTGA  
 CY112837 CTGGGACACCATGCAGTG---CCAAACGGAAACGCTAGTGA  
 AJ404626 ATCGGCCACCACTCAACAACTCCACAGAAACT---GTGG  
 CY087800 ATTGGATACCATGCCAATAATTCCACAGAGAAG---GTGG  
 CY032261 ATTGGATACCATGCCAATAATTCCACAGAAAAG---GTGG  
 AF116575 ATAGGCTACCATGCGAATAACTCAACCGACACT---GTGG  
 CY006667 ATAGGCTACCATGCCAACAACCTCAACCGACACT---GTGG  
 CY009604 ATAGGCTACCATGCGAACAACCTCAACCGACACT---GTGG  
 CY020445 ATAGGCTACCATGCGAACAATTCAACCGACACT---GTGG  
 CY045772 ATAGGCTACCATGCGAACAATTCAACCGACACT---GTGG  
 CY009340 ATAGGCTACCATGCGAACAATTCAACCGACACT---GTGG  
 CY013271 ATAGGCTACCATGCGAACAACCTCAACCGACACT---GTGG  
 CY010372 ATAGGCTACCATGCGAACAACCTCAACCGACACT---GTGG  
 CY021037 ATAGGCTACCATGCGAACAACCTCAACCGACACT---GTGG  
 CY021957 ATAGGTTATCATGCAACAATTCAACAGACACT---GTAG  
 JX046926 ATAGGTTATCATGCGAACAATTCAACAGACACT---GTAG  
 CY049987 ATAGGTTATCATGCGAACAATTCAACAGACACT---GTAG  
 GQ132138.1| ATAGGTTATCATGCGAACAATTCAACAGACACT---GTAG

161

CY080523 AAACAATCACAGATGATCAGATTGAAGTGACTAATGCTAC  
 CY118914 AAACAATCACGAATGACCAAAATTGAAGTTACTAATGCTAC  
 CY113365 AAACAATAACGAATGATCAGATTGAAGTGACTAATGCTAC  
 CY112837 AAACAATCACGAATGACCAAAATTGAAGTGACTAATGCTAC  
 AJ404626 ACACGCTAACAGAAACCAATGTTCTGTGACACATGCCAA  
 CY087800 ACACAATTCTAGAGCGGAACGTCAGTGTGACTCATGCCAA  
 CY032261 ACACAATTCTAGAGCGGAATGTCAGTGTGACTCATGCCAA  
 AF116575 ACACAGTACTCGAAAAAAGATGTGACCGTGACACACTCTGT  
 CY006667 ACACAGTACTTGAGAAGAATGTGACAGTGACACACTCTGT  
 CY009604 ACACACTACTCGAGAAGAATGTGACAGTGACACATTCTGT  
 CY020445 ACACAGTACTCGAGAAGAATGTGACAGTGACACACTCTGT  
 CY045772 ACACAGTACTCGAGAAGAATGTGACAGTGACACACTCTGT  
 CY009340 ACACAGTACTCGAAAAAAGATGTGACAGTGACACACTCTGT  
 CY013271 ACACAGTACTCGAAAAAAGATGTGACAGTGACACACTCTGT  
 CY010372 ACACAGTACTCGAAAAAAGATGTGACAGTGACACACTCTGT  
 CY021037 ACACAGTACTCGAAAAAAGATGTGACAGTGACACACTCTGT  
 CY021957 ATACAGTACTAGAAAAAAGATGTAAACAGTAAACACTCTGT  
 JX046926 ACACAGTACTAGAAAAAAGATGTAAACAGTAACTCACTCTGT  
 CY049987 ACACAGTACTAGAAAAAAGATGTAAACAGTAAACACTCTGT  
 GQ132138.1| ACACAGTACTAGAAAAAAGATGTAAACAGTAAACACTCTGT

201

CY080523 TGAGCTAGTTTCAGAGTTCCTCAACGGGGAAAAATATGCAA-  
 CY118914 TGAGCTGGTTTCAGAGTTCCTCAACAGGTGGAATATGCGA-  
 CY113365 TGAGCTGGTTTCAGAGTTCCTCAACAGGTAGAATATGCGA-  
 CY112837 TGAGCTGGTTTCAGAGTTCCTCAACAGGTAGAATATGCGA-  
 AJ404626 AGAATTGCTCCACACAGAGCATAATGGAAATGCTGTGTGCA  
 CY087800 GGACATTCTTGAGAAGACCCATAACGGAAAGTATGCAAA  
 CY032261 GGACATTCCTTGAGAAGACCCATAACGGAAAGTATGCAAA  
 AF116575 TAACCTGCTCGAAGACAGCCACAACGGGAAAATATGTAAA  
 CY006667 CAACCTACTTGAGGACAGTCACAATGGGAAAATATGTCTA  
 CY009604 TAACCTGCTCGAAGACAGCCACAACGGGAAAATATGTAAA  
 CY020445 TAACCTGCTCGAAGACAGCCACAACGGGAAAATATGTAGA  
 CY045772 TAACCTGCTCGAAGACAGCCACAACGGGAAAATATGTAGA  
 CY009340 AAACCTACTCGAAGACAGCCACAACGGGAAAATATGCAGA  
 CY013271 AAACCTACTCGAAGACAGCCACAACGGGAAAATATGCAGA  
 CY010372 CAACCTACTTGAGGACAGTCACAACGGGAAAATATGCAGA  
 CY021037 CAACCTACTTGAGGACAAATCACAACGGGAAAATATGCAAA  
 CY021957 TAATCTTCTTGAAAGACAGCATAACGGGAAAATATGTAAA  
 JX046926 TAACCTTCTAGAAGACAAGCATAACGGGAAAATATGCAAA  
 CY049987 TAACCTTCTAGAAGACAAGCATAACGGGAAAATATGCAAA  
 GQ132138.1| TAACCTTCTAGAAGACAAGCATAACGGGAAAATATGCAAA

241

CY080523 -CAA-----TCCTCATCGAATCCCTGATGGAAAT  
 CY118914 -CAG-----TCCTCATCAGATCCCTGATGGAGA  
 CY113365 -CAG-----TCCTCACCAGATCCCTGATGGAAA  
 CY112837 -CAG-----TCCTCACCAGATCCCTGATGGAAA  
 AJ404626 ACAAGCCTGGGACATCCCTCATT-----CT-----AGA  
 CY087800 CTAA-----ACGGAATCCCTCCACTTGAACT-----AGG  
 CY032261 CTAA-----ACGGAATCCCTCCACTTGAACT-----AGG  
 AF116575 TTAA-----AAGGAATAGCCCCATTACAATT-----GGG  
 CY006667 CTAA-----AAGGAATAGCCCCACTACAATT-----GGG  
 CY009604 TTAA-----AAGGAATAGCCCCACTACAATT-----GGG  
 CY020445 TTAA-----AAGGAATAGCCCCACTACAATT-----GGG  
 CY045772 TTAA-----AAGGAATAGCCCCATTACAATT-----GGG  
 CY009340 TTAA-----AAGGAATAGCCCCACTACAATT-----GGG  
 CY013271 TTAA-----AAGGAATAGCCCCACTACAATT-----GGG  
 CY010372 CTAA-----AAGGAATAGCCCCACTACAATT-----GGG  
 CY021037 CTAA-----AAGGAATAGCGCCACTACAATT-----GGG  
 CY021957 CTGG-----GGGGGATAGCCCCATTGCATT-----GGG  
 JX046926 CTAA-----GAGGGGTAGCCCCATTGCATT-----GGG  
 CY049987 CTAA-----GAGGGGTAGCCCCATTGCATT-----GGG  
 GQ132138.1| CTAA-----GAGGGGTAGCCCCATTGCATT-----GGG

281

CY080523 AGACTGCA-CACTGATAGATGCTCTATTGGGGGACCCCTCA  
 CY118914 AAAGTGA-CACTAATAGATGCTCTATTGGGAGACCCCTCA  
 CY113365 AAAGTGA-CACTGATAGATGCTCTATTGGGAGACCCCTCA  
 CY112837 AAAGTGA-CACTGATAGATGCTCTATTGGGAGACCCCTCA  
 AJ404626 CACATGCACTATTGAAGGAAT-AGTCTATGGCAACCCCTTC  
 CY087800 GGACTGTAGCATTGCCGGATG-GCTCCTTGGAAATCCAGA  
 CY032261 GGACTGTAGCATTGCCGGATG-GCTCCTTGGAAATCCAGA  
 AF116575 GAAATGTAATATCGCCGGATG-GCTCTTGGGAAACCCGGA  
 CY006667 TAATTGCAGCGTTGCCGGATG-GATCTTAGGAAACCCAGA  
 CY009604 GAAATGTAACATCGCCGGATG-GCTCTTGGGAAACCCAGA  
 CY020445 GAAATGTAACATCGCCGGATG-GCTCTTGGGAAACCCAGA  
 CY045772 GAAATGTAACATCGCCGGATG-GATCTTGGGAAACCCAGA  
 CY009340 GAAATGTAACATTGCCGGATG-GATCTTGGGAAACCCAGA  
 CY013271 GAAATGTAACATTGCCGGATG-GATCTTAGGAAACCCAGA  
 CY010372 GAAATGCAACATTGCCGGATG-GATCTTAGGAAACCCAGA  
 CY021037 GAAATGCAACATTGCCGGATG-GATCTTAGGAAACCCAGA  
 CY021957 TAAATGTAACATTGCCGGATG-GCTTTTGGGAAACCCAGA  
 JX046926 TAAATGTAACATTGCCGGCTG-GATCCTGGGAAATCCAGA  
 CY049987 TAAATGTAACATTGCTGGCTG-GATCCTGGGAAATCCAGA  
 GQ132138.1| TAAATGTAACATTGCTGGCTG-GATCCTGGGAAATCCAGA

321

CY080523 TTGTGA--TGTTTTCAAAATGAGACATGGGACCTTTTTCG  
 CY118914 GTGTGA--TGGCTTCCAAAATAGAAAATGGGACCTTTTTTG  
 CY113365 TTGTGA--TGGCTTCCAAAATGAGAAATGGGACCTTTTTTG  
 CY112837 TTGTGA--TGGCTTCAAAAATAGGAATGGGACCTTTTTTG  
 AJ404626 TTGTGACCTGCTGTTGGGAGGAAGAGAATGGTCCTACATC  
 CY087800 ATGTGATAGGCTTCTAAGTGTGCCAGAAATGGTCCTATATA  
 CY032261 ATGTGATAGGCTTCTAAGGGTGGCAGAAATGGTCCTATATA  
 AF116575 ATGCGATTTACTGCTCACAGCGAGCTCATGGTCCTATATT  
 CY006667 ATGCGAATTACTGATTTCCAAGGAATCATGGTCCTACATT  
 CY009604 ATGCGACTCACTGCTTCCAGCGAGATCATGGTCCTACATT  
 CY020445 ATGCGACCCACTGCTTCCAGCGAGATCATGGTCCTACATT  
 CY045772 ATGCGACTCATGCTTCCAGCGAGTTTCATGGTCCTACATT  
 CY009340 ATGCGAATCATTGCTCTCTAATAGATCATGGTCCTACATT  
 CY013271 ATGCGAATCACTGCTTCTAAGAGATCATGGTCCTACATT  
 CY010372 ATGCGAATCACTGTTTTCTAAGAAATCATGGTCCTACATT  
 CY021037 ATGCGAATCACTGTTTTCTAAGAAATCATGGTCCTACATT  
 CY021957 ATGTGAATTACTACTCACAGTAAGCTCATGGTCCTACATT  
 JX046926 GTGTGAATCACTCTCCACAGCAAGCTCATGGTCCTACATT  
 CY049987 GTGTGAATCACTCTCCACAGCAAGCTCATGGTCCTACATT  
 GQ132138.1| GTGTGAATCACTCTCCACAGCAAGCTCATGGTCCTACATT

361

CY080523 TTGAACGCAGCAAAGCCTT-----TCAGCAACTGTTACCCCTT  
 CY118914 TTGAACGCAGCAAAGCCTT-----ACAGCAACTGTTACCCCTT  
 CY113365 TTGAACGCAGCAAAGCCTT-----ACAGCAACTGTTACCCCTT  
 CY112837 TTGAACGCAGCAACAGCTT-----ACAGCAACTGTTACCCCTT  
 AJ404626 TTCGAAAAGATCATCAGCTGTAAATGGAACTGTTACCCCTG  
 CY087800 ATGGAGAAAAGAAAACCCGAGAGACGGTTTGTGTTATCCAG  
 CY032261 ATGGAGAAAAGAAAACCCGAAAACAGTTTGTGTTACCCAG  
 AF116575 GTAGAAAACATCGAACTCAGAGAAATGGAAATGTTACCCAG  
 CY006667 GTAGAAAACACCAAATCCTGAGAAATGGAAATGTTACCCAG  
 CY009604 GTAGAAAACACCAAATCCTGAGAAATGGAGCATGTTATCCAG  
 CY020445 GTAGAAAACACCAAATCCTGAGAAATGGAAATATGTTATCCAG  
 CY045772 GTAGAAAACACCAAATCCTAAGAATGGAAATATGTTATCCAG  
 CY009340 GCAGAAAACACCAAATCCTGAGAAATGGAAATATGTTACCCAG  
 CY013271 GCAGAAAACACCAAATCCTGAGAAATGGAAATGTTACCCAG  
 CY010372 GCAGAAAACACCAAATCCTGAGAAATGGAAATGTTACCCAG  
 CY021037 GCAGAAAACACCAAATCCTGAGAAATGGAAATGTTACCCAG  
 CY021957 GTGGAAAACATCGAACTCAGACAATGGGACATGTTACCCAG  
 JX046926 GTGGAAAACATCTAGTTTCAGACAATGGAACTGTTACCCAG  
 CY049987 GTGGAAAACATCTAGTTTCAGACAATGGAACTGTTACCCAG  
 GQ132138.1| GTGGAAAACATCTAGTTTCAGACAATGGAACTGTTACCCAG

401

CY080523 ATGATGTGGCCAGATTATGCCTCCCTTAGGTCACT-----  
 CY118914 ATGATGTGGCCGATTATGCCTCCCTTAGGTCACT-----  
 CY113365 ATGATGTGGCCGATTATGCCTCCCTTAGGTCACT-----  
 CY112837 ATGATGTGGCCGATTATGCCTCCCTTAGGTCACT-----  
 AJ404626 GGAATGTAGAAAACCTAGAGGAACTCAGGACACTTTTITAG  
 CY087800 GCAGCTTCAATGATTATGAAGAATTGAAACATCTCCTCAG  
 CY032261 GCAGCTTCAATGACTATGAAGAATTGAAACATCTCCTCAG  
 AF116575 GAGATTTTCATCGACTATGAAGAATGAGGGAGCAATTGAG  
 CY006667 GGTATTTTCGCCGACTATGAGGAACTGAGGGAGCAATTGAG  
 CY009604 GAGATTTTCATCGACTATGAGGAACTGAGGGAGCAATTGAG  
 CY020445 GAGCTTTTCATCGACTATGAGGAACTGAGGGAGCAATTGAG  
 CY045772 GAGATTTTCATCGACTATGAGGAACTGAGGGAGCAATTGAG  
 CY009340 GAGATTTTCGCCGACTATGAGGAACTGAGGGAGCAATTGAG  
 CY013271 GAGATTTTCGCCGACTATGAGGAACTGAGGGAGCAATTGAG  
 CY010372 GATATTTTCGCCGACTATGAGGAACTGAGGGAGCAATTGAG  
 CY021037 GGTATTTTCGCCGACTATGAAGAATGAGGGAACTAATTGAG  
 CY021957 GAGATTTTCATCAATTATGAAGAGCTGAGAGAGCAGTTGAG  
 JX046926 GAGATTTTCATCAATTATGAGGAGCTAAGAGAGCAATTGAG  
 CY049987 GAGATTTTCATCGATTATGAGGAGCTAAGAGAGCAATTGAG  
 GQ132138.1| GAGATTTTCATCGATTATGAGGAGCTAAGAGAGCAATTGAG

441

CY080523 ---AGTTGCCTCGTCAGGCACCTGAGATTATCACTGAG  
 CY118914 ---AGTTGCCTCATCCGGCACACTGGAGTTTAACAATGAA  
 CY113365 ---AGTTGCCTCATCAGGCACCTGGAGTTTATCAATGAA  
 CY112837 ---AGTTGCCTCATCCGGCACCTGGAGTTTACCAATGAA  
 AJ404626 TTCCCGCTAGTTCTACCAAAGAAATCCAAATCTTCCCAGA-  
 CY087800 CAGCGTGAAACATTTGAGAAAAGTAAAGATTCTGCCCAAA  
 CY032261 CAGCGTAAAAACATTTGAGAAAAGTAAAGATTCTGCCCAAA  
 AF116575 CTCAGTGTTCATCGTTGAAAAAATCGAAAATATTCCCAG  
 CY006667 TTCAGTATCTTCATTTGAGAGGTTGAAAATATTCCCAG  
 CY009604 CTCAGTATCATCATTAGAAAGATTGAAAATATTCCCAG  
 CY020445 CTCAGTGTTCATCATTGAAAAGATTGAAAATATTCCCAG  
 CY045772 CTCAGTATCATCATTGAAAAGATTGAAAATATTCCCAG  
 CY009340 CTCAGTATCATCATTGAGAGATTGAAAATATTCCCAG  
 CY013271 CTCAGTATCATCATTGAGAGATTGAAAATATTCCCAG  
 CY010372 CTCAGTATCATCATTGAGAGATTGAAAATATTCCCAG  
 CY021037 TTCAGTATCATCATTGAGAGATTGAAAATATTCCCAG  
 CY021957 CTCAGTGTTCATCATTGAAAAGATTGAGATATTCCCAG  
 JX046926 CTCAGTGTTCATCATTGAAAAGTTTGAATAATTCCCAG  
 CY049987 CTCAGTGTTCATCATTGAAAAGTTTGAATAATTCCCAG  
 GQ132138.1| CTCAGTGTTCATCATTGAAAAGTTTGAATAATTCCCAG

481

CY080523 GGTTCACCTTGGAC-----TGGGTCACCTCAGAAATGGGG  
 CY118914 AGCTTCAATTGGAC-----TGGAGTCACTCAAAACGGAA  
 CY113365 GACTTCAATTGGAC-----TGGAGTCACTCAGAGTGGGG  
 CY112837 GGCTTCAATTGGAC-----TGGAGTCGCTCAGGATGGAA  
 AJ404626 -----CACAACTGGAAATGTGA  
 CY087800 GATAG---ATGGACACAGCATAACAACAACTGGAGGTTTCA  
 CY032261 GATAG---ATGGACACAGCATAACAACAACTGGAGGTTTCAA  
 AF116575 ACAAGCTCGTGGCCCAATCATGAAACAAACAAAGGTGTAA  
 CY006667 GAGAGCTCATGGCCCAACACACCGTAACCGGA---GTAT  
 CY009604 GAAAGTTTCATGGCCCAACACAAACACTCAAAGGAGTAA  
 CY020445 GAAAGCTCATGGCCCAACACAAACACAAACATAGGAGTAA  
 CY045772 GAAAGCTCATGGCCCAACACAGCACAAACAAAGGAGTAA  
 CY009340 GAAAGCTCATGGCCCAACACAAACATAACAGAGGAGTAA  
 CY013271 GAAAGATCATGGCCCAACACAAACATAAACATAGGAGTAA  
 CY010372 GAAAGATCATGGCCCAACACAAACGTAAACAGAGGCGTAA  
 CY021037 GAAAGTTTCATGGCCCAACACAAACGTAAACAAAGGAGTAA  
 CY021957 ACAAGTTCTGTGGCCCAATCATGAAACAAACAGAGGTGTGA  
 JX046926 ACAAGTTTCATGGCCCAATCATGACTCGAACAAAGGTGTAA  
 CY049987 ACAAGCTCATGGCCCAATCATGACTCGAACAAAGGTGTAA  
 GQ132138.1| ACAAGTTTCATGGCCCAATCATGACTCGAACAAAGGTGTAA

521

CY080523 GAA-----GCAATGCTTGCAAAAAGGGACCTGGTAG  
 CY118914 CAA-----GCTCTGCTTGCAAAAAGGAGATCTAATTA  
 CY113365 GAA-----GCCATGCTTGCAAAAAGGGATCTGTAA  
 CY112837 CAA-----GCTATGCCCTTGCAAAAAGGGATCTGTAA  
 AJ404626 -----CTTACACTGGAAACAGCAGAGCATGTTTC  
 CY087800 GGG-----CCTGGCGGCTGTCTGGTAATCCA  
 CY032261 AGG-----CCTGGCGAGTGTCTAGGTGAACCA  
 AF116575 CGGCAGCATGCTCCCATGCGGGAGCAAGCAGT-----  
 CY006667 CAGCATCATGCTCCCATTAACGGGAAAAAGCAGT-----  
 CY009604 CAGCATCATGCTCCCATGGGGGAAAAAGCAGT-----  
 CY020445 CGGCAGCATGCTCCCATGCGGGGAAAAAGCAGT-----  
 CY045772 CGGCAGCATGCTCCCATGCAAGGAAAGAGCAGT-----  
 CY009340 CGGTAGCATGCTCCCAACGCGAAGAAAAAGCAGT-----  
 CY013271 CGGCAGCATGCTCCCATGCGGGGAAAAAGCAGT-----  
 CY010372 CGGCATCATGCTCCCATTAAGGGGAAAAAGCAGT-----  
 CY021037 CGGCATCATGCTCCCATTAAGGGGAAAAAGCAGT-----  
 CY021957 CGGCAGCATGCCCTTATGCTGGAGCAAAACAGC-----  
 JX046926 CGGCAGCATGTCTCTGTGCTGGAGCAAAAAGC-----  
 CY049987 CGGCAGCATGTCTCTATGCTGGAGCAAAAAGC-----  
 GQ132138.1| CGGCAGCATGTCTCTATGCTGGAGCAAAAAGC-----

561

CY080523 CGGT---TTTTTCAGTAGACTGAACTGGTTGACCAAAATCA  
 CY118914 CAGT---TTCTTTAGTAGATTGAATTGGTTGACCCACTTA  
 CY113365 CAGT---TTCTTCAGTAGATTGAATTGGTTGCACGAATCA  
 CY112837 AAGT---TTCTTTAGTAGATTGAATTGGTTGCACAAATTA  
 AJ404626 AGGTTTCAATCTACAGGAGTATGAGATGGCTGACTCAAAAG  
 CY087800 ----TCATTCTTCAGGAACATGGTCTGGCTGACAGAGAAA  
 CY032261 ----TCATTCTTCAGGAACATGGTCTGGCTGACAAAGAAA  
 AF116575 ----TTTTACAGAAATTTGCTGTGGCTGACAAAGAAG  
 CY006667 ----TTTTACAAAAATTTGCTATGGCTGACGGGGAAG  
 CY009604 ----TTTTACAGAAATTTGCTATGGCTGACGAAAGMG  
 CY020445 ----TTTTACAGAAATTTGCTATGGCTGACGAAGAAG  
 CY045772 ----TTTTACAGAAATTTGCTATGGCTGACGAAGAAG  
 CY009340 ----TTTTACAAAAATTTGCTCTGGCTAACGGAGGCA  
 CY013271 ----TTTTACAAAAATTTGCTCTGGCTGACGGAGAAA  
 CY010372 ----TTTTACAGAAATTTGCTATGGCTGACGGAGAAA  
 CY021037 ----TTTTACAGAAATTTGCTATGGCTGACGGAGAAA  
 CY021957 ----TTCTACAGAAATTTAATATGGCTGGTTAAAAAAA  
 JX046926 ----TTCTACAAAAATTTAATATGGCTAGTTAAAAAAA  
 CY049987 ----TTCTACAAAAATTTAATATGGCTAGTTAAAAAAA  
 GQ132138.1| ----TTCTACAAAAATTTAATATGGCTAGTTAAAAAAA

601

CY080523 GGAAGCACATATCCAGTGTGAACTGACTATGCCAAACA  
 CY118914 AAATTCAAATACCCAGCATTTGAACGTGACTATGCCAAACA  
 CY113365 GAATACAAATATCCAGCGGTGAACGTGACTATGCCAAACA  
 CY112837 GAATACAAATATCCAGCACTGAACGTGACTATGCCAAACA  
 AJ404626 AGCGGTTTTTTTACCCTGTTCAAGACGCCCAATACACAAATA  
 CY087800 GGATCAAAATTATCCGGTTGCCAAAGGATCGTACAAACAATA  
 CY032261 GGACCAAAATTATCCGGTTGCCAAAGGATCGTACAAACAATA  
 AF116575 GGAAGGTCATACCCAAAGCTTAGCAAGTCCTATGTGAACA  
 CY006667 AATGGTTTGTACCCAAACCTGAGCAAGTCCTATGTGAACA  
 CY009604 GGGGATTCATACCCAAAGCTGAACAAATTCCTATGTGAACA  
 CY020445 GGGGGCTCATACCCAAAGCTGAAAAATTCCTATGTGAACA  
 CY045772 GAGGACTCATACCCAAAGCTGAGCAATTCCTATGTGAACA  
 CY009340 AATGGCTTATACCCAAAGCTGAGCAAGTCCTATGTGAACG  
 CY013271 GATGGCTCATACCCAAATCTGAACAAAGTCCTATGTGAACA  
 CY010372 AATGGCTCGTACCCAAATCTGAGCAAGTCCTATGTGAACA  
 CY021037 AATGGCTCGTACCCAAAGCTGAGCAAGTCCTATGTGAACA  
 CY021957 GAAAAATTCATACCCAAAGCTCAGCAAAATCCTATGTTAACA  
 JX046926 GGAAATTCATACCCAAAGCTCAGCAAAATCCTACATTAAATG  
 CY049987 GGAAATTCATACCCAAAGCTCAGCAAAATCCTACATTAAATG  
 GQ132138.1| GGAAATTCATACCCAAAGCTCAGCAAAATCCTACATTAAATG

641

CY080523 ATGACAATTTTIGACAAACTATACATTTGGGGGGTTCACCA  
 CY118914 ATGAAAAATTTIGACAAATTTGTACATTTGGGGGGTTCACCA  
 CY113365 ATGGCAAAATTTIGACAAATTTGTACATTTGGGGGGTTCACCA  
 CY112837 ATGACAAATTTIGACAAATTTGTACATTTGGGGGGTTCACCA  
 AJ404626 ACAGGGGGAAGAGCATTTCTTTTCGTGGGGCATACATCA  
 CY087800 CAAGCGGAGAACAAATGCTAATAATTTGGGGGGTGCACCA  
 CY032261 CGAGCGGAGAGCAAAATGCTAATAATTTGGGGAGTGCACCA  
 AF116575 ATAAAGGGGAAAGAAATTCCTTGTACTATGGGGGTTCATCA  
 CY006667 GCAAGAGAAAGAAATTCCTTGTACTATGGGGGTTCATCA  
 CY009604 ATAAAGGGGAAAGAAATTCCTTGTACTATGGGGGTTCATCA  
 CY020445 AAAAAAGGGGAAAGAAATTCCTTGTACTATGGGGGTTCATCA  
 CY045772 AGAAAGGGGAAAGAAATTCCTTGTACTATGGGGGTTCATCA  
 CY009340 ACAGAGAGAAAGAAATTCCTTGTACTATGGGGGTTCATCA  
 CY013271 AGAAAGAGAAAGAAATTCCTTGTACTATGGGGGTTCATCA  
 CY010372 ACAAAGAGAAAGAAATTCCTTGTACTATGGGGGTTCATCA  
 CY021037 ACAAGAGAGAAAGAAATTCCTTGTACTATGGGGGTTCATCA  
 CY021957 ATAAAGGGGAAAGAAATTCCTTGTACTATGGGGCATTCATCA  
 JX046926 ATAAAGGGGAAAGAAATTCCTCGTGTGGGGCATTCACCA  
 CY049987 ATAAAGGGGAAAGAAATTCCTCGTGTGGGGCATTCACCA  
 GQ132138.1| ATAAAGGGGAAAGAAATTCCTCGTGTGGGGCATTCACCA

681

CY080523 CCCGAGCACGAACCAAGAACAAACCCAGCCTGTAT-----  
 CY118914 CCCGGGTACAGACAAATGACCAAAATCTTCCTGTAT-----  
 CY113365 CCCGATCACGGACAGAGAACAAACCAACCTATAT-----  
 CY112837 CCCGAGTACGGACAGTGAACCAAAACCCAGCCTATAT-----  
 AJ404626 CCCACCCACCTATACCGAGCAAAACAAATTTGTACATAAGA  
 CY087800 TCCCAATGATGAGACAGAACAAAGAACATTTGTACCAGAAAT  
 CY032261 TCCTAAGGATGAGGCAGAACAAAGAGCATTGTACCAGAAAT  
 AF116575 TCCGCCTACCGGTACTGATCAACAGAGTCTCTATCAGAAT  
 CY006667 CCCGCCTAACATAGGGGACCAAAAGGGCCCTCTATCATACA  
 CY009604 CCCGTCTAGCAGTAATGAGCAACAGAGTCTCTATCATAAAT  
 CY020445 CCCGTCTAACAGTAAGGATCAACAGACTCTCTATCAGAAT  
 CY045772 CCCGTCTAGCAGTAAAGAGCAACAGACTCTCTATCAGAAT  
 CY009340 CCCGTCTAACATAGAGGATCAAAAGGACCCCTCTATCGGAAA  
 CY013271 CCCGTCTAACATAGAGAAATCAAAAGACCCCTCTATCGGAAA  
 CY010372 CCCGTCTAACATAGAGGACCAAAAGACCATCTATCGGAAA  
 CY021037 CCCGTCTAACATAAAGGACCAAAAGACCATCTATCGTAAA  
 CY021957 TCCACCTACCAGTACTGATCAACAAAGTCTCTACCAAAAT  
 JX046926 TCCATCTACTACTGCTGACCAACAAAGTCTCTATCAGAAT  
 CY049987 TCCATCTACTAGTGTGACCAACAAAGTCTCTATCAGAAT  
 GQ132138.1| TCCATCTACTAGTGTGACCAACAAAGTCTCTATCAGAAT

721

CY080523 -----GTTCAAGCATCAGGGAGAGTCACAGTCTCTACCA  
 CY118914 -----GOTCAAGCATCAGGAAGAAATCACAGTCTCTACCA  
 CY113365 -----GTTGAGCATCAGGGAGAGTCACAGTCTCTACCA  
 CY112837 -----GTTCAAGCATCAGGGAGAGTCACAGTCTCTACCA  
 AJ404626 AACGCACAAACAACAAGCGTGACAACAGAAAGATTGAAATA  
 CY087800 GTGGGAACCTATGTTTCCGTAGGCACATCAACATTGAACA  
 CY032261 GTGGGAACCTATGTTTCCGCAAGCACATCAACATTGAACA  
 AF116575 GCAGATGCTTATGTCTCTGTAGGGTCATCAAAATATAACA  
 CY006667 GAAAAATGCTTATGTCTCTGTAGTGTCTTCACATTATAGCA  
 CY009604 GTAAATGCTTATGTCTCTGTAGTGTCTTCAAATTATAACA  
 CY020445 GAAAAATGCTTATGTCTCTGTAGTGTCTTCAAATTATAACA  
 CY045772 GAAAAATGCTTATGTCTCTGTAGTGTCTTCAAATTATAACA  
 CY009340 GAAAAATGCTTATGTCTCTGTGGTGTCTTCAAATTATAACA  
 CY013271 GAAAAATGCTTATGTCTCTGTAGTGTCTTCAAATTATAACA  
 CY010372 GAAAAATGCTTATGTCTCTGTAGTGTCTTCAAATTATAACA  
 CY021037 GAAAAATGCTTATGTCTCTGTAGTGTCTTCACATTATAACA  
 CY021957 GCAGATGCTTATGTTTTTGTAGGGTCATCAAAATATAACA  
 JX046926 GCAGATGCATATGTTTTTGTGGGGACATCAAGATACAGCA  
 CY049987 GCAGATGCATATGTTTTTGTAGGGTCATCAAGATACAGCA  
 GQ132138.1| GCAGATGCATATGTTTTTGTGGGGTCATCAAGATACAGCA

761

CY080523 GGAGAAGCCAGCAAACTATAATCCCGAATATCGAGTCCAG  
 CY118914 AAATAAGTCAACAAAAGTGAATCCCGAATATCGGATCTAG  
 CY113365 AGAGAAGCCAGCAAACTGAATCCCGAATATCGGGTTTAG  
 CY112837 AAAGAAGCCAAACAAACTGAATCCCGAATATCGGGTCTAG  
 AJ404626 GGACC-----TTCAAAACAGTGATAGGGCCAAG  
 CY087800 AAAGG-----TCAACCCCAAGAAATAGCAACAAG  
 CY032261 AAAGG-----TCAACCCCTGAAATAGCAGCAAG  
 AF116575 GGAGA-----TTCAACCCCGGAAATAGCAGCGAG  
 CY006667 GAAGA-----TTCAACCCCAAGAAATAGCCAAAAG  
 CY009604 GGAGA-----TTCAACCCCGGAAATAGCTGCAAG  
 CY020445 GGAGA-----TTCAACCCCGGAAATAGCAGAAAAG  
 CY045772 GGAGA-----TTCAATCCCGGAAATAGCAGAAAAG  
 CY009340 GGAGA-----TTCAACCCCGGAAATAGCAGAAAAG  
 CY013271 GGAGA-----TTCAACCCCGGAAATAGCAGAAAAG  
 CY010372 GGAGA-----TTCAACCCCAAGAAATAGCAGAAAAG  
 CY021037 GGAGA-----TTCAACCCCAAGAAATAGCAAAAAG  
 CY021957 GAAAG-----TTCAAGCCAGAAATAGCAGCAAG  
 JX046926 AGAAG-----TTCAAGCCCGGAAATAGCAATAAG  
 CY049987 AGAAG-----TTCAAGCCCGGAAATAGCAATAAG  
 GQ132138.1| AGAAG-----TTCAAGCCCGGAAATAGCAATAAG

801

CY080523 ACCCTGGGTAAAGGGGTCTGTCTAGTAGAATAAGCATCTAT  
 CY118914 ACCCAGAGTAAGGAATATCCCCAGCAGAATAAGCATCTAT  
 CY113365 ACCCTGGGTAAAGGGGTCTGTCCAGTAGAATAAGCATCTAT  
 CY112837 ACCCTGGGTAAAGGGGTGTCTCCAGCAGAATAAGCATCTAT  
 AJ404626 GCCCTTGTCAATGGTCTGCAGGGGAAGAAATGATTATTAT  
 CY087800 GCCTTAAAGTGAATGGACAGGAGGTAGAATGGAAATCTCT  
 CY032261 GCCTGAAGTGAATGGACTAGGAAGTAGAATGGAAATCTCT  
 AF116575 ACCCAAAGTAAGAGATCAAGCTGGGAGGATGAACATTAC  
 CY006667 ACCCAAAGGTAGAGATCAGGAAGGAAGAAACAACACTAC  
 CY009604 ACCCAAAGTAAGAGATCAACCTGGGAGGATGAACATTAC  
 CY020445 ACCCGAAGTAAGAGATCAAGCTGGGAGGATGAACATTAC  
 CY045772 ACCCGAAGTAAAAAGATCAAGCTGGGAGGATAAACTATTAC  
 CY009340 ACCCAAAGTAAGAGGTCAACCCAGGGAGAAATGAACATTAC  
 CY013271 ACCCAAAGTAAGAGGTCAAGCAGGGAGAAATGAACATTAC  
 CY010372 ACCCAAAGTAAGAGGTCAAGCAGGGAGAAATTAACACTAC  
 CY021037 ACCCAAAGTAAGAGATCAAGAAGGGAGAAATTAACACTAC  
 CY021957 ACCCAAAGGTAGAGGTCAAGCAGGGAGGATGAACATTAC  
 JX046926 ACCCAAAGTGAAGGATCAAGAAGGGAGAAATGAACATTAC  
 CY049987 ACCCAAAGTGAAGGATCAAGAAGGGAGAAATGAACATTAC  
 GQ132138.1| ACCCAAAGTGAAGGGTCAAGAAGGGAGAAATGAACATTAC

841

CY080523 TGGACAATAGCTTAATCCGGGAGACGTACTGGTAATTAAATA  
 CY118914 TGGACAATAGTAAAACCGGGAGACATACTTTTGATTAAACA  
 CY113365 TGGACAATAGTAAAACCGGGAGACATACTGTTGATTAAATA  
 CY112837 TGGACAATAGTAAAACCGGGAGACATACTTTTGATTAAACA  
 AJ404626 TGGTCGGTACTAAAACCGGGCCAAACATTGCGAGTACGAT  
 CY087800 TGGACCCCTCTTGGATATGTGGGACACCAATAAAATTTTGAGA  
 CY032261 TGGACCCCTCTTGGATCTCTGGGACACCATAAAATTTTGAGA  
 AF116575 TGGACATTACTAGAACCCTGGAGACACAATAACATTTTGAGG  
 CY006667 TGGACTCTGCTGGAACCCGGGGATACAATAATATTTTGAGG  
 CY009604 TGGACCTTGCTAGAACCCTGGAGACACAATAATATTTTGAGG  
 CY020445 TGGACCTTGCTAGAACCCTGGAGACACAATAATGTTTGAGG  
 CY045772 TGGACCTTGCTAGAACCCTGGAGACACAATAATATTTTGAGG  
 CY009340 TGGACTTTGCTAGAACCCTGGAGACAAAATAATATTTTGAGG  
 CY013271 TGGACTTTGCTAGAACCCTGGAGACACAATAATATTTTGAGG  
 CY010372 TGGACTCTGCTGGAACCCGGGGACACAATAATATTTTGAGG  
 CY021037 TGGACTCTGCTGGAACCCGGGGACACAATAATATTTTGAGG  
 CY021957 TGGACACTAATAGAACCCTGGAGACACAATAACATTTGAAG  
 JX046926 TGGACACTAGTAGAGCCGGGAGACAAAATAACATTCGAAG  
 CY049987 TGGACACTAGTAGAGCCGGGAGACAAAATAACATTCGAAG  
 GQ132138.1 TGGACACTAGTAGAGCCGGGAGACAAAATAACATTCGAAG

881

CY080523 GTAATGGGAACCTAATCGCTCCTCGGGGTTATTTCAAAAT  
 CY118914 GCACAGGGGAATCTAATTGCTCCTAGGGGTTACTTCAAAAT  
 CY113365 GCACCGGGGAACCTAATTGCTCCTCGGGGTTACTTCAAAAT  
 CY112837 GCACAGGGGAATCTAATTGCTCCTCGGGGTTACTTCAAAAT  
 AJ404626 CCAATGGGAATCTAATTGCTCCATGGTATGGACACGTTCT  
 CY087800 GTACTGGTAATCTAATTGCACCAGAGTATGGATTCAAAAT  
 CY032261 GCACTGGTAATCTAGTTGCACCAGAGTATGGATTCAAAAT  
 AF116575 CAACTGGAAATCTAATAGCACCATGGTATGCTTTTCGCACT  
 CY006667 CAAATGGAAATCTAATAGCGCCAAGGTATGCTTTTCGCACT  
 CY009604 CAACTGGTAATCTAATAGCACCATGGTATGCTTTTCGCACT  
 CY020445 CAAATGGAAATCTGGTAGCACCATGGTATGCTTTTCGCACT  
 CY045772 CTAATGGAAATCTAGTAGCACCATGGTATGCTTTTCGCACT  
 CY009340 CAAATGGAAACCTAATAGCGCCATGGTATGCTTTTCGCACT  
 CY013271 CAAATGGAAATCTAATAGCGCCATGGTATGCTTTTCGCACT  
 CY010372 CAAATGGAAATCTAATAGCGCCATGGCATGCTTTTCGCACT  
 CY021037 CAAATGGAAATCTAATAGCGCCATGGTATGCTTTTCGCACT  
 CY021957 CAACTGGAAATCTAGTGGTACCGAGATATGCTTTTCGCAAT  
 JX046926 CAACTGGAAATCTATTTGGTACCGAGATATGCATTTCGCAAT  
 CY049987 CAACTGGAAATCTAGTGGTACCGAGATATGCATTTCGCAAT  
 GQ132138.1 CAACTGGAAATCTAGTGGTACCGAGATATGCATTTCGCAAT

921

CY080523 ---GCGCACTGGGAAAAAGCTCA---ATAATGAGGTCAGAT  
 CY118914 ---ACGAAGTGGGAAAAAGCTCA---ATAATGAGATCAGAT  
 CY113365 ---ACGCAATGGGAAAAAGCTCA---ATAATGAGGTCAGAT  
 CY112837 ---ACGAAGTGGGAAAAAGCTCA---ATAATGAGGTCAGAT  
 AJ404626 TTCAGGAGGGAGCCATGG---AAGAAATCCTGAAGACTGAT  
 CY087800 ATCGAAAAAGAGG---TAGTTCAAGGGATCATGAAAACAGAA  
 CY032261 ATCGAAAAAGAGG---TAGTTCAAGGGATCATGAAGACAGAA  
 AF116575 ---GAATAGAGGTTCTGGATCCGGTATCATCACTTCAGAC  
 CY006667 ---GAGTAGAGGCTTTGGATCAGGAATCATCACCTCAAAC  
 CY009604 ---GAGTAGAGGATTTGGGTCCGGCATCATCACCTCAAAC  
 CY020445 ---GAGTAGAGGCTTTGGGTCCGGCATCATCACCTCAAAC  
 CY045772 ---GAGTAGAGGCTTTGGGTCCGGCATCATCACCTCAAAC  
 CY009340 ---GAGTAGAGGCCCTGGATCAGGAATCATCACCTCCAAAC  
 CY013271 ---AAGTAGAGGCCTTGGATCAGGAATCATCACCTCAAAC  
 CY010372 ---GAATAGAGGCTTTGGGTCAAGGAATCATCACCTCAAAC  
 CY021037 ---GAGTAGAGGCTTTGGGTCAAGGAATCATCACCTCAAAC  
 CY021957 ---GAATAGAGGTTCTGGATCTGGTATTATAAATTCGGAT  
 JX046926 ---GGAAAGAAATGCTGGATCTGGTATTATCATTTTCAGAT  
 CY049987 ---GGAAAGAAATGCTGGATCTGGTATTATCATTTTCAGAT  
 GQ132138.1 ---GGAAAGAAATGCTGGATCTGGTATTATCATTTTCAGAT



961

CY080523 GCACCTATTGATACCTGTATTTCTGAATGCATCACTCCAA  
 CY118914 GCACCCATTGGCAAAATGCAATTCTGAATGCATCACTCCAA  
 CY113365 GCACCTATTGGCACCTGCAGTTCTGAATGCATCACTCCAA  
 CY112837 GCACCCATTGACAACTGCAATTCTGAATGCATCACTCCAA  
 AJ404626 TTAAAAGGTGGTAATTGTGTAGTGCAAATGTCAGACTGAAA  
 CY087800 GGAACACTTGAGAACTGTGAGACCAAAATGCCAAACTCCTT  
 CY032261 GGAACACTTGGGAACTGTGAGACCAAAATGCCAAACTCCTT  
 AF116575 GCACCAGTGCATGATTGTAAACACGAAGTGTCAAACACCCC  
 CY006667 GCACCAATGGATGAATGTGATGCGAAGTGTCAAACACCTC  
 CY009604 GCGTCAATGCATGAGTGTAAACACGAAGTGTCAAACACCCC  
 CY020445 GCATCAATGCATGAGTGTAAACACGAAGTGTCAAACACCCC  
 CY045772 GCATCAATGCATGAGTGTAAACACGAAGTGTCAAACACCCC  
 CY009340 GCATCAATGGATGAATGTGACACGAAGTGTCAAACACCCC  
 CY013271 GCATCAATGGATGAATGTGACACGAAGTGTCAAACACCCC  
 CY010372 GCATCGATGGATGAATGTGACACGAAGTGTCAAACACCCC  
 CY021037 GCATCGATGGATGAATGTGACGCGAAGTGTCAAACACCCC  
 CY021957 GCACCAGTTTCATGATTGTAAACACGAAGTGTCAAACACCCA  
 JX046926 ACACCAGTCCACGATTGCAATACAACTTGTGAGACACCCA  
 CY049987 ACACCAGTCCACGATTGCAATACAACTTGTGAGACACCCA  
 GQ132138.1| ACACCAGTCCACGATTGCAATACAACTTGTGAGACACCCA

1001

CY080523 ATGGAAGCATTTCCCAATGACAAAGCCCTTTCAAAAAGTAAA  
 CY118914 ATGGAAGCATTTCCCAATGACAAACCAATTTCAAAATGTAAA  
 CY113365 ATGGAAGCATTTCCCAATGACAAACCCCTTTCAAAATGTAAA  
 CY112837 ATGGAAGCATTTCCCAATGGCAAACTTTTCAAAATGTAAA  
 AJ404626 AAGGTGGCTTAAACAGTACATTGCCATTCCACAATATCAG  
 CY087800 TGGGAGCAATAAAATACAACATTGCCCTTTTCACAATGTCCA  
 CY032261 TGGGAGCAATAAAATACAACACTACCTTTTTCACAATGTCCA  
 AF116575 ATGGTGTCTATAAAACAGCAGTCTCCCTTTTCCAGAATATACA  
 CY006667 AGGGAGCTATAAAACAGCAGTCTTCCCTTTCCAGAATGTACA  
 CY009604 AGGGAGCTATAAAACAGCAGTCTCCCTTTTCCAGAATATACA  
 CY020445 AGGGAGCTATAAAACAGCAGTCTCCCTTTTCCAGAATATACA  
 CY045772 AGGGAGCTATAAAACAGCAGTCTCCCTTTTCCAGAATATACA  
 CY009340 AGGGAGCCATAAAACAGTAGCCTCCCTTTTTCAGAACATACA  
 CY013271 AGGGAGCTATAAAACAGTAGTCTCCCTTTTCCAGAATATACA  
 CY010372 AGGGAGCTATAAAACAGTAGTCTTCCCTTTTCCAGAATATACA  
 CY021037 AGGGAGCTATAAAACAGTAGTCTTCCCTTTTTCAGAAATGTACA  
 CY021957 AGGGTGCCATAAAACACCAGCCTCCCATTTTCAGAATATACA  
 JX046926 AGGGTGCTATAAAACACCAGCCTCCCATTTTCAGAATATACA  
 CY049987 AGGGTGCTATAAAACACCAGCCTCCCATTTTCAGAATATACA  
 GQ132138.1| AGGGTGCTATAAAACACCAGCCTCCCATTTTCAGAATATACA

1041

CY080523 CAAGATCACATATGGAGCATGCCCAAGTATGTTAAGCAA  
 CY118914 CAGGATCACATACGGGGCCTGTCCCAGATATGTTAAGCAA  
 CY113365 CAAGATCACATATGGGGCATGTCCCAGGTATGTTAAGCAA  
 CY112837 CAGGATCACATATGGGGCCTGTCCCAGATATGTTAAGCAA  
 AJ404626 TAAATATGCATTTGGAACTGCCCAAAATATGTAAAGATT  
 CY087800 CCCACTGACAATAGGTGAGTGTCCCAAAATATGTAAAAATCG  
 CY032261 CCCACTAACAATAGGTGAATGCCCAAAATATGTAAAAATCG  
 AF116575 TCCAGTCACAATAGGAGAGTGTCCCAAAATACGTCAAGGAGT  
 CY006667 CCCAGTCACAATAGGAGAGTGTCCAAAGTATGTCAAGGAGT  
 CY009604 CCCAGTCACAATAGGAGAGTGTCCCAAAATATGTCAAGGAGT  
 CY020445 CCCAGTCACAATAGGAGAGTGTCCCAAAATACGTCAAGGAGT  
 CY045772 CCCAGTCACAATAGGAGAGTGTCCCAAAATACGTCAAGGAGT  
 CY009340 CCCAGTCACAATAGGAGAGTGTCCCAAAATATGTCAAGGAGT  
 CY013271 CCCATTACACAATAGGAGAGTGTCCCAAAATACGTCAAGGAGT  
 CY010372 CCCAGTCACAATAGGGGAGTGTCCCAAAATACGTCAAGGAGT  
 CY021037 CCCAGTCACAATAGGAGAGTGTCCCAAAATACGTCAAGGAGT  
 CY021957 TCCAGTCACAATTTGGAGAAATGTCCCAAAATATGTCAAAAGC  
 JX046926 TCCGATCACAAATGGAAAAATGTCCCAAAATATGTAAAAAGC  
 CY049987 TCCGATCACAAATTTGGAAAAATGTCCCAAAATATGTAAAAAGC  
 GQ132138.1| TCCGATCACAAATTTGGAAAAATGTCCCAAAATATGTAAAAAGC

1081

CY080523 AACACCCCTGAAGCTTGGCAACAGGGGATGCGGAATGTACCAG  
CY118914 AACACTCTGAAATTTGGCAACAGGGGATGCGAAATGTACCAG  
CY113365 AACACTCTGAAATTTGGCAACAGGGGATGCGGAATGTACCAG  
CY112837 AACACTCTAAAAATTTGGCAACAGGGGATGCGGAATGTACCAG  
AJ404626 AATAGTCTCAAACTGGCAGTCGGTCTGAGGAACGTGCCGTG  
CY087800 GAGAAAGTTGGTCTTAGCAACAGGACTAAGGAATGTTCCCC  
CY032261 GAGAAATTTGCTCTTAGCAACAGGACTAAGGAATGTTCCCC  
AF116575 ACCAAATTTGAGGATGGCTACAGGACTAAGAAACATTCCCAT  
CY006667 GC AAAATTTAAGGATGGTTACAGGACTAAGGAACATCCCAT  
CY009604 ACCAAATTTGAGGATGGTTACAGGACTAAGAAACATCCCAT  
CY020445 GCCAAATTTGAGGATGGTTACAGGACTAAGGAACATCCCGT  
CY045772 GCCAAATTTGAGGATGGTTACAGGACTAAGGAACATCCCAT  
CY009340 ACCAAATTTGAGGATGGTTACAGGACTAAGGAACATCCCAT  
CY013271 ACCAAATTTGAGGATGGTTACAGGACTAAGGAACATCCCAT  
CY010372 ACAAAAATTTGAGGATGGTTACAGGACTAAGGAACATCCCAT  
CY021037 ACAAAAATTTAAGGATGGTTACAGGACTAAGGAACATCCCAT  
CY021957 ACAAAAATTTGAGAATGGCTACAGGACTAAGGAATATCCCGT  
JX046926 ACAAAAATTTGAGACTGGCCACAGGATTGAGGAATGTCCCGT  
CY049987 ACAAAAATTTGAGACTGGCCACAGGATTGAGGAATGTCCCGT  
GQ132138.1| ACAAAAATTTGAGACTGGCCACAGGATTGAGGAATGTCCCGT

1121

CY080523 AGAAACAAAAGTAGAGGCCTATTTCGGCGCAAAAGCAGGTTT  
CY118914 AGAAACAAAAGTAGAGGCATATTTCGGCGCAATCGCGGGTTT  
CY113365 AGAAACAAAAGTAGAGGCATATTTCGGCGCAATAGCAGGTTT  
CY112837 AGAAACAAAAGTAGAGGCATATTTCGGCGCAATCGCAGGTTT  
AJ404626 CTAGATCAAGTAGAGGACTATTTCGGAGCCATAGCTGGATT  
CY087800 AGATTGAATCAAGAGGATTGTTTGGGGCAATAGCTGGTTT  
CY032261 AGATTGAATCAAGAGGATTGTTTGGGGCAATAGCTGGCTT  
AF116575 CTATTCAATCCAGGGGTCTATTTCGGAGCCATTGCCGGTTT  
CY006667 CCATTCAATCCAGAGGTTTCTATTTCGGAGCCATTGCCGGTTT  
CY009604 CCATTCAATCCAGAGGTTCTATTTCGGAGCCATTGCTGGTTT  
CY020445 CCATTCAATCCAGAGGTTCTATTTCGGAGCCATTGCCGGTTT  
CY045772 CCATTCAATCCAGGGGTCTATTTCGGAGCCATTGCCGGTTT  
CY009340 CCATTCAATCCAGAGGTTCTGTTTCGGAGCCATTGCCGGTTT  
CY013271 CCATTCAATCCAGAGGTTCTGTTTCGGAGCCATTGCCGGTTT  
CY010372 CCATTCAATCCAGAGGTTCTGTTTCGGAGCCATTGCCGGTTT  
CY021037 CCATTCAATCCAGAGGTTTCTGTTTCGGAGCCATTGCCGGTTT  
CY021957 CTATTCAATCTAGAGGTTCTGTTTCGGAGCCATTGCTGGTTT  
JX046926 CTATTCAATCTAGAGGCCTATTTCGGAGCCATTGCCGGCTT  
CY049987 CTATTCAATCTAGAGGCCTATTTCGGGGCCATTGCCGGTTT  
GQ132138.1| CTATTCAATCTAGAGGCCTATTTCGGGGCCATTGCCGGTTT

1161

CY080523 CATAGAAAAATGGTTGGGAGGGAATGATAGACGGTTGGTAC  
CY118914 CATAGAAAAATGGTTGGGAGGGAATGGTGGATGGTTGGTAC  
CY113365 CATAGAAAAATGGTTGGGAGGGAATGGTAGACGGTTGGTAC  
CY112837 CATAGAAAAATGGTTGGGAGGGAATGGTAGACGGTTGGTAC  
AJ404626 CATAGAAGGAGGTTGGCCAGGACTAGTCGCTGGCTGGTAT  
CY087800 TATAGAAGGAGGATGGCAAGGAATGGTTGATGGTTGGTAT  
CY032261 TATAGAAGGAGGATGGCAAGGAATGGTTGATGGTTGGTAT  
AF116575 TATTGAGGGGGGATGGACTGGAATGATAGATGGATGGTAT  
CY006667 CATTGAAGGGGGGTGGACTGGAATGGTAGATGGTTGGTAT  
CY009604 TATTGAGGGGGGATGGACTGGAATGATAGATGGATGGTAT  
CY020445 TATTGAAGGGGGATGGACTGGAATGATAGATGGATGGTAT  
CY045772 TATTGAAGGGAGGATGGACTGGAATGATAGATGGATGGTAT  
CY009340 CATTGAAGGGGGGATGGACTGGAATGGTGGATGGATGGTAT  
CY013271 CATTGAAGGGGGGATGGGCTGGAATGATAGATGGATGGTAT  
CY010372 CATTGAAGGGGGGATGGACTGGAATGATAGATGGATGGTAT  
CY021037 CATTGAAGGGGGGATGGACTGGAATGATTGATGGATGGTAT  
CY021957 TATTGAGGGGGGATGGACAGGAATGATAGATGGATGGTAT  
JX046926 CATTGAAGGGGGGTGGACAGGGATGGTAGATGGATGGTAC  
CY049987 CATTGAAGGGGGGTGGACAGGGATGGTAGATGGATGGTAC  
GQ132138.1| CATTGAAGGGGGGTGGACAGGGATGGTAGATGGATGGTAC

1201

CY080523 GGTTCAGGCATCAAAATTCCTGAGGGCACAGGACAAGCAG  
 CY118914 GGTTCAGGCACCAAAATTCCTGAGGGAAATAGGACAAGCAG  
 CY113365 GGTTCAGGCATCAAAATTCCTGAGGGCACAGGACAAGCAG  
 CY112837 GGTTCAGGCATCAAAATTCCTGAGGGCACAGGACAAGCAG  
 AJ404626 GGTTCAGCATTCAAATGATCAAGGGGTTGGTATGGCTG  
 CY087800 GGATACCATCACAGCAATGACCAGGGATCAGGGTATGCAG  
 CY032261 GGATACCATCACAGCAATGACCAGGGATCAGGGTATGCAG  
 AF116575 GGTTCATCATCATCAGAATGAACAGGGATCAGGCTATGCAG  
 CY006667 GGTTCATCATCATCAGAATGAGCAAGGATCTGGGTATGCTG  
 CY009604 GGTTCATCATCATCAGAATGAACAGGGATCAGGCTATGCAG  
 CY020445 GGTTCATCATCATCAGAATGAACAGGGATCAGGCTATGCAG  
 CY045772 GGTTCATCATCATCAGAATGAACAGGGATCAGGCTATGCAG  
 CY009340 GGTTCACCATCATCAGAATGAGCAGGGATCTGGCTATGCTG  
 CY013271 GGTTCACCATCATCAGAATGAACAGGGATCTGGCTATGCTG  
 CY010372 GGTTCATCATCATCAGAATGAACAGGGATCTGGCTATGCTG  
 CY021037 GGTTCATCATCATCAGAATGAACAGGGATCTGGCTATGCTG  
 CY021957 GGTTCATCACCATCAGAATGAACAGGGATCAGGATATGCAG  
 JX046926 GGTTCATCACCATCAAAATGAGCAGGGGTCAGGATATGCAG  
 CY049987 GGTTCATCACCATCAAAATGAGCAGGGGTCAGGATATGCAG  
 GQ132138.1| GGTTCATCACCATCAAAATGAGCAGGGGTCAGGATATGCAG

1241

CY080523 CAGATCTTAAAAAGCACTCAAGCAGCCATCGACCAAATCAA  
 CY118914 CAGATCTCAAAAAGCACTCAAGCAGCAATCGATCAAATCAA  
 CY113365 CAGATCTTAAAAAGCACTCAAGCAGCAATCGACCAAATCAA  
 CY112837 CAGATCTTAAAAAGCACTCAAGCAGCAATCAACCAAATCAA  
 AJ404626 CAGATAGGGATTCAACTCAAAAGGCAATTGATAAAATAAC  
 CY087800 CAGACAAAAGAAATCCACTCAAAAGGCATTTGATGGAATCAC  
 CY032261 CAGACAAAAGAAATCCACTCAAAAGGCATTTGATGGAATCAC  
 AF116575 CGGATCAAAAAAGCACACAAAATGCCATTGACGGGATTAC  
 CY006667 CAGATCAAAAAAGCACACAAAATGCCATTAAACGGGATTAC  
 CY009604 CGGATCAAAAAAGCACACAAAATGCCATTAAACGGGATTAC  
 CY020445 CGGATCAAAAAAGCACACAAAATGCCATTAAACGGGATTAC  
 CY045772 CGGATCAAAAAAGCACACAAAATGCCATTAAACGGGATTAC  
 CY009340 CGGACCAAAAAAGCACACAAAATGCCATTAAACGGGATTAC  
 CY013271 CGGATCAAAAAAGCACACAAAATGCCATTAAACGGGATTAC  
 CY010372 CGGATCAAAAAAGCACACAAAATGCCATTAAACGGGATTAC  
 CY021037 CGGATCAAAAAAGCACACAAAATGCCATTAAACGGGATTAC  
 CY021957 CGGACCAAAAGGAGCACACAAAATGCCATTGACGGGATCAC  
 JX046926 CCGACCTGAAGAGCACACAGAATGCCATTGACAAGATTAC  
 CY049987 CCGACCTGAAGAGCACACAGAATGCCATTGACGAGATTAC  
 GQ132138.1| CCGACCTGAAGAGCACACAGAATGCCATTGACGAGATTAC

1281

CY080523 TGGGAAATTTGAACAGGGTAAATCGAGAAGACGAACGAGAAA  
 CY118914 TGGGAAGCTGAATAGGTTGATCGGGAAAAACCAATGAGAAA  
 CY113365 CGGGAAACTGAATAGGTTAATCGAGAAAAACGAACGAGAAA  
 CY112837 CGGGAAACTGAATAGGTTAATCGAGAAAAACGAACGAGAAA  
 AJ404626 ATCCAAGGTGAATAATATAGTCGACAAGATGAACAAGCAA  
 CY087800 CAACAAGGTAAAATTCCTGTGATTGAAAAAGATGAACACCCAA  
 CY032261 CAACAAGGTAAAATTCCTGTGATTGAAAAAGATGAACACCCAA  
 AF116575 AAACAAGGTGAATTCTGTTATCGAGAAAAATGAACACCCAA  
 CY006667 AAACAAGGTGAATTCTGTTAATTGAGAAAAATGAACACTCAA  
 CY009604 AAACAAGGTGAACCTCTGTTATCGAGAAAAATGAACACTCAA  
 CY020445 AAACAAGGTGAACCTCTGTTATCGAGAAAAATGAACACTCAA  
 CY045772 AAACAAGGTGAACCTCTGTTATCGAGAAAAATGAACACTCAA  
 CY009340 AAATAAGGTGAACCTCTGTTATCGAGAAAAATGAACACTCAA  
 CY013271 AAATAAGGTAAACTCTGTTATCGAGAAAAATGAACACTCAA  
 CY010372 AAACAAGGTGAACCTCTGTTATCGAGAAAAATGAACACTCAA  
 CY021037 AAACAAGGTGAACCTCTATAATCGAGAAAAATGAACACTCAA  
 CY021957 TAACAAAGTAAAATTCCTGTTATTGAAAAAGATGAACACGCAA  
 JX046926 TAACAAAGTAAAATTCCTGTTATTGAAAAAGATGAATACACAG  
 CY049987 TAACAAAGTAAAATTCCTGTTATTGAAAAAGATGAATACACAG  
 GQ132138.1| TAACAAAGTAAAATTCCTGTTATTGAAAAAGATGAATACACAG

1321

CY080523 TTCCATCAAATCGAAAAAGAAATTCTCAGAAGTAGAAGGGA  
 CY118914 TTCCATCAGATTGAAAAAGAAATTCTCAGAAGTAGAAGGGA  
 CY113365 TTCCATCAAATCGAAAAAGAAATTCTCAGAAGTAGAAGGGA  
 CY112837 TTCCATCAAATCGAAAAAGAAATTCTCAGAAGTAGAAGGGA  
 AJ404626 TATGAAATAATTGATCATGAATTCAGTGAGGTTGAAACTA  
 CY087800 TTTGAAGCTGTTGGGAAAAGAAATCAGTAACCTTAGAGAGAA  
 CY032261 TTTGAAGCTGTTGGGAAAAGAAATCAATAAATTTAGAGAAAA  
 AF116575 TT-----  
 CY006667 TTCACAGCTGTGGGCAAAAGAAATCAACAAATTTGGAAAGAA  
 CY009604 TTCACAGCTGTGGGTAAAGAAATTCACCAACTTAGAAAAAA  
 CY020445 TTCACAGCTGTGGGTAAAGAAATTCACCAACTTAGAAAAAA  
 CY045772 TTCACAGCTGTGGGTAAAGAAATTCACCAACTTAGAAAAAA  
 CY009340 TTCACAGCTGTGGGTAAAGAAATTCACCAAAATTTGGAAAAAA  
 CY013271 TTCACAGCTGTGGGTAAAGAAATTCACCAAAATTTAGAAAAAA  
 CY010372 TTCACAGCTGTGGGTAAAGAAATTCACCAAAATTTAGAAAAAA  
 CY021037 TTCACAGCTGTGGGTAAAGAAATTCACCAAACTAGAAAAAA  
 CY021957 TTCACGGCAGTGGGTAAAGAAATTCACCACCTTGGAAAAAA  
 JX046926 TTCACAGCAGTAGGTAAAGAGTTCAACCACCTGGAAAAAA  
 CY049987 TTCACAGCAGTAGGTAAAGAGTTCAACCACCTGGAAAAAA  
 GQ132138.1| TTCACAGCAGTAGGTAAAGAGTTCAACCACCTGGAAAAAA

1361

CY080523 GAATTCAGGACCTCGAGAAATACGTTGAAGACACTAAAAAT  
 CY118914 GAATTCAGGACCTCGAGAAATATGTTGAGGACACTAAAAAT  
 CY113365 GAATTCAGGACCTCGAGAAATATGTTGAAGACACTAAAAAT  
 CY112837 GAATTCAGGACCTCGAGAAATATGTTGAAGACACTAAAAAT  
 AJ404626 GACTCAATATGATCAATAATAAGATTGATGACCAAAATACA  
 CY087800 GACTGGAGAACTTGAAACAAAAAGGTGGAAGACGGGTTTCT  
 CY032261 GACTGGAGAACTTGAAACAAAAAGATGGAAGACGGGTTTCT  
 AF116575 -----  
 CY006667 GGATGGAAAACTTAAATAAAAAAGTTGATGATGGGTTTCT  
 CY009604 GGATGGAAAACTTAAATAAAAAAGTTGATGATGGATTTTCT  
 CY020445 GGATGGAAAACTTAAATAAAAAAGTTGATGATGGATTTTCT  
 CY045772 GGATGGAAAACTTAAATAAAAAAGTTGATGATGGATTTTCT  
 CY009340 GGATGGAAAACTTAAATAAAAAAGTTGATGATGGATTTTCT  
 CY013271 GGATGGAAAACTTAAATAAAAAAGTTGATGATGGATTTTCT  
 CY010372 GGATGGAAAACTTAAATAAAAAAGTTGATGATGGATTTTCT  
 CY021037 GGATGGAAAACTTAAATAAAAAAGTTGATGATGGATTTTCT  
 CY021957 GAATAGAGAATTTAAACAAAAAGGTGATGATGGTTTCT  
 JX046926 GAATAGAGAATTTAAATAAAAAAGTTGATGATGGTTTCT  
 CY049987 GAATAGAGAATTTAAATAAAAAAGTTGATGATGGTTTCT  
 GQ132138.1| GAATAGAGAATTTAAATAAAAAAGTTGATGATGGTTTCT

1401

CY080523 AGATCTCTGGTCTTACAATGCGGAGCTTCTTGTCGCTCTG  
 CY118914 AGATCTCTGGTCTTACAACGCGGAGCTTCTTGTCGCTCTG  
 CY113365 AGATCTCTGGTCTTACAACGCGGAGCTTCTTGTCGCTCTG  
 CY112837 AGATCTCTGGTCTTACAACGCGGAGCTTCTTGTCGCTCTG  
 AJ404626 AGACGTATGGGCATATAATGCAGAAATGCTAGTACTACTT  
 CY087800 AGATGTGTGGACATACAATGCTGAGCTTCTAGTTCTGATG  
 CY032261 AGATGTGTGGACATACAATGCTGAGCTTCTAGTTCTGATG  
 AF116575 -----  
 CY006667 AGACATTTGGACATATAATGCAGAAATGTTGGTTCTACTG  
 CY009604 GGACATTTGGACATATAATGCAGAAATGTTAGTTCTACTG  
 CY020445 GGACATTTGGACATATAATGCAGAAATGTTAGTTCTACTG  
 CY045772 GGACATTTGGACATATAATGCAGAAATGTTAGTTCTACTG  
 CY009340 GGACATTTGGACATATAATGCAGAAATGTTGGTTCTACTG  
 CY013271 GGACATTTGGACATATAATGCAGAAATGTTGGTTCTACTG  
 CY010372 GGACATTTGGACATATAATGCAGAAATGTTGGTTCTACTG  
 CY021037 GGACATTTGGACATATAATGCAGAAATGTTGGTTCTACTG  
 CY021957 GGATATTTGGACATACAATGCAGAACTGTTGGTTCTATTG  
 JX046926 GGACATTTGGACTTACAATGCCGAACGTGTTGGTTCTATTG  
 CY049987 GGACATTTGGACTTACAATGCCGAACGTGTTGGTTCTATTG  
 GQ132138.1| GGACATTTGGACTTACAATGCCGAACGTGTTGGTTCTATTG

1441

CY080523 GAGAATCAACATACAAATTGACCTGACTGACTCGGAAATGA  
 CY118914 GAGAACCAACATACAAATTGATTTAACTGACTCAGAAATGA  
 CY113365 GAGAACCAACATACAAATTGATCTGACTGACTCAGAAATGA  
 CY112837 GAGAACCAACATACAAATTGATCTAACTGACTCAGAAATGA  
 AJ404626 GAAAAATCAAAAAACACTCGATGAGCATGATGCGAACGTGA  
 CY087800 GAAAAATGAGAGGACACTTGACTTTTCATGATTCCTAAATGTCA  
 CY032261 GAAAAATGAGAGGACACTTGACTTTTCATGATTCCTAAATGTCA  
 AF116575 -----  
 CY006667 GAAAAATGAAAGGACTTTGGATTTCATGACTCCAACTGA  
 CY009604 GAAAAATGAAAGGACTTTGGATTTCATGACTTAAATGTGA  
 CY020445 GAAAAATGAAAGGACTCTGGATTTCATGACTCAAAATGTGA  
 CY045772 GAAAAATGAAAGGACTCTGGATTTCATGACTCAAAATGTGA  
 CY009340 GAAAAATGAAAGGACTTTGGATTTCATGACTCAAAATGTGA  
 CY013271 GAAAAATGAAAGGACTTTGGATTTCATGACTCAAAATGTGA  
 CY010372 GAAAAATGAAAGGACTTTGGATTTCATGACTCAAAATGTGA  
 CY021037 GAAAAATGAAAGGACTTTGGATTTCATGACTCAAAATGTGA  
 CY021957 GAAAAATGAAAGGACTCTGGATTTCACGACTCGAAATGTAA  
 JX046926 GAAAAATGAAAGGACTTTGGACTACCACGATTCAAAATGTGA  
 CY049987 GAAAAATGAAAGGACTTTGGACTACCACGATTCAAAATGTGA  
 GQ132138.1| GAAAAATGAAAGGACTTTGGACTACCACGATTCAAAATGTGA

1481

CY080523 ACAAGCTGTTTGAAAAAACAAAGGAGGCAACTGAGGGAAAA  
 CY118914 ACAAACTGTTTGAAAAAACAAAGGAGCAACTGAGGGAAAA  
 CY113365 ACAAACTGTTTGAAAAAACAAAGGAGCAACTGAGGGAAAA  
 CY112837 ACAAACTGTTTGAAAAAACAAAGGAGCAACTGAGGGAAAA  
 AJ404626 ACAATCTATATAACAAGGTGAAGAGGGCACTGGGCTCCAA  
 CY087800 AGAATCTGTATGATAAAGTCAGAAATGCAGCTGAGAGACAA  
 CY032261 AGAACCTGTATGATAAAGTCAGAAATGCAGCTGAGAGACAA  
 AF116575 -----  
 CY006667 AGAATCTGTATGAGAAAGTAAAAAGCCAAATTAAGAAATAA  
 CY009604 AGAATCTGTATGAGAAAGTAAAAAGCCAAATTAAGAAATAA  
 CY020445 AGAATCTGTATGAGAAAGTAAAAAGCCAAATTAAGAAATAA  
 CY045772 AAAATCTGTATGAGAAAGTAAAAATCCAAATTAAGAAATAA  
 CY009340 AGAATCTGTATGAGAAAGTAAAAAACCAATTAAGAAATAA  
 CY013271 AGAATCTGTATGAGAAAGTAAAAAACCAATTAAGAAATAA  
 CY010372 AGAATCTGTATGAGAAAGTAAAAAGCCAAATTAAGAAATAA  
 CY021037 AGAACCTGTATGAGAAAGTAAAAAGCCAAATTAAGAAATAA  
 CY021957 AGAACCTGTATGAGAAAGTAAAGAGCCAGCTAAGGAACAA  
 JX046926 AGAACTTGTATGAAAAAGGTGAGAAACCAGTTAAAAAACAA  
 CY049987 AGAACTTATATGAAAAAGGTAAAGAGCCAGCTAAAAAACAA  
 GQ132138.1| AGAACTTATATGAAAAAGGTAAAGAGCCAGCTAAAAAACAA

1521

CY080523 TGCTGAAGACATGGGCAATGGTTGCTTCAAAATATACCAC  
 CY118914 TGCTGAGGACATGGGCAATGGTTGTTTCAAAATATACCAC  
 CY113365 TGCTGAGGACATGGGCAATGGTTGCTTCAAGATATACCAC  
 CY112837 TGCTGAGGACATGGGCAATGGTTGCTTCAAAATATATCAC  
 AJ404626 TGCTATGGAAGATGGGAAAGGCTGTTTCGAGCTATACCAT  
 CY087800 CGTCAAAAGAACTAGGAAATGGATGTTTTGAATTTTATCAC  
 CY032261 CGTCAAAAGAACTAGGAAATGGATGTTTTGAATTTTATCAC  
 AF116575 -----  
 CY006667 TGCCAAAGAAAATAGGGAACGGGTGTTTTGAATTCCTATCAC  
 CY009604 TGCCAAAGAAAATCGGAAATGGGTGTTTTGAGTTCTACCAC  
 CY020445 TGCCAAAGAAAATCGGAAATGGATGTTTTGAGTTCTACCAC  
 CY045772 TGCCAAAGAAAATCGGAAATGGGTGTTTTGAGTTCTACCAC  
 CY009340 TGCCAAAGAAAATAGGGAACGGGTGTTTTGAGTTCTACCAC  
 CY013271 TGCCAAAGAAAATAGGGAACGGGTGTTTTGAGTTCTACCAC  
 CY010372 TGCCAAAGAAAATAGGGAACGGGTGTTTTGAATTCCTACCAC  
 CY021037 TGCCAAAGAAAATAGGGAACGGGTGTTTTGAATTCCTACCAC  
 CY021957 TGCCAAAGAAAATGGGAATGGCTGCTTTGAATTCCTATCAC  
 JX046926 TGCCAAAGAAAATGGGAACGGCTGCTTTGAATTTTACCAC  
 CY049987 TGCCAAAGGAAGTTGGGAACGGGTGCTTTGAATTTTACCAC  
 GQ132138.1| TGCCAAAGGAATTTGGGAACGGCTGCTTTGAATTTTACCAC

1561

CY080523 AAATGTGACAAAGCTTGCATAGAGTCAATCAGAAATGGGA  
 CY118914 AAATGTGACAATGCCTGCATAGGATCAATCAGAAATGGAA  
 CY113365 AAATGTGACAATGCCTGCATAGGGTCAATCAGAAATGGAA  
 CY112837 AAATGTGACAATGCCTGCATAGGGTCAATCAGAAATGGAA  
 AJ404626 AAATGTGATGATCAGTGCATGGAAACAAATTCGGAACGGGA  
 CY087800 AAATGTGATGATGAATGCATGAATAGTGTGAAAAACGGGA  
 CY032261 AAATGTGACGATGAATGCATGAATAGTGTGAAAAACGGGA  
 AF116575 -----  
 CY006667 AAGTGTAAACGATGAATGCATGGAGAGTGTGAAAAATGGAA  
 CY009604 AAGTGTGACAATGAATGCATGGAAAAGTGTAAAGAAATGGGA  
 CY020445 AAGTGTGACAATGAATGCATGGAAAAGTGTAAAGAAATGGGA  
 CY045772 AAGTGTGACAATGAATGCATGGAAAAGTGTGAGAAATGGGA  
 CY009340 AAGTGTGACAATGAATGCATGGAAAAGTGTAAAAAATGGAA  
 CY013271 AAGTGTAAACAATGAATGCATGGAAAAGTGTAAAAAATGGAA  
 CY010372 AAGTGTAAACAATGAATGCATGGAAAAGTGTAAAAAATGGAA  
 CY021037 AAGTGTAAACAATGAATGCATGGAAAAGTGTAAAAAATGGAA  
 CY021957 AAATGTGATGATACATGCATGGAGAGCGTCAAAAAATGGGA  
 JX046926 AAATGCGATAACACGTCATGGAAAAGTGTCAAAAAATGGGA  
 CY049987 AAATGCGATAACACGTCATGGAAAAGTGTCAAAAAATGGGA  
 GQ132138.1| AAATGCGATAACACGTCATGGAAAAGTGTCAAAAAATGGGA

1601

CY080523 CTTATGACCATGATGTATACAGAGACGAAGCATTAAACAA  
 CY118914 CTTATGACCATGATGTATACAGAGATGAAGCATTAAACAA  
 CY113365 CTTATGACCATGATGTATACAGAGACGAAGCATTAAACAA  
 CY112837 CTTATGACCATGATGTATACAGAGACGAAGCATTAAACAA  
 AJ404626 CCTATAATAGGAGAAAAGTATAGAGAGGAATCAAGACTAGA  
 CY087800 CGTATGATTATCCCAAGTATGAAGAAGAGTCTAAACTAAA  
 CY032261 CGTATGATTATCCCAAGTATGAAAAAGAACTCTAAACTAAA  
 AF116575 -----  
 CY006667 CTTATGACTATCCAAAAATATTCCGAAGAATCAAAGTTAAA  
 CY009604 CTTATGATTATCCAAAAATATTGAGAAGAATCAAAGTTGAA  
 CY020445 CTTATGATTATCCCAAAATATTGAGAAGAGTCAAAGTTGAA  
 CY045772 CTTATGATTATCCAAAAATATTCAAAAAGAAATCAAAGTTGAA  
 CY009340 CTTATGATTATCCCAAAAGTATTGAGAGGAATCAAAGTTAAA  
 CY013271 CTTATGATTATCCCAAAATATTGAGAGGAATCAAAGTTAAA  
 CY010372 CTTATGACTATCCAAAAATATTGAGAGGAATCAAAGTTAAA  
 CY021037 CTTATGACTATCCAAAAATATTGAGAGGAATCAAAGTTAAA  
 CY021957 CTTATGATTATCCCAAAAGTACTCAGAAGAATCAAAGCTAAA  
 JX046926 CTTATGACTATCCCAAAATACTCAGAGGAAGCAAAATTTAAA  
 CY049987 CTTATGACTATCCCAAAATACTCAGAGGAAGCAAAATTTAAA  
 GQ132138.1| CTTATGACTATCCCAAAATACTCAGAGGAAGCAAAATTTAAA

1641

CY080523 CCGGTTTCAGATCAAAGGCTGTGAACTGAAGTCTGGATAC  
 CY118914 CCGGTTCCAGATCAAGGGCGTTGAGCTGAAGTCAGGATAC  
 CY113365 CCGGTTCCAGATCAAAGGCTGTGAGCTGAAGTCAGGATAC  
 CY112837 CCGGTTCCAGATCAAAGGCTGTGAGCTGAAGTCAGGATAC  
 AJ404626 AAGGCAGAAAAATAGAGGGGGTTAAGCTGGAATCTGAGGGA  
 CY087800 TAGAAATGAAATCAAAGGGGTAAAAATTGAGCAGCATGGGG  
 CY032261 TAGAAATGAAATCAAAGGGGTAAAAATTGAGCAGCATGGGG  
 AF116575 -----  
 CY006667 CAGGGAGAAAAATTGATGGAGTGAAATTGGAATCAATGGGA  
 CY009604 CAGGGAAAAAGATAGATGGAGTGAAATTGGAATCAATGGGG  
 CY020445 CAGGGAAAAAGATAGATGGAGTGAAATTGGAATCAATGGGG  
 CY045772 CAGGGAAAAAGATAGATGGAGTGAAATTGGAATCAATGGGG  
 CY009340 CAGGGCAAAAAATTGATGGAGTAAAACTGGAATCAATGGGG  
 CY013271 CAGGGAAAAAAATTGATGGAGTGAAATTGGAATCAATGGGG  
 CY010372 CAGGGAAAAAAATTGATGGAGTGAAATTGGAATCAATGGGA  
 CY021037 CAGGGAAAAAAATTGATGGAGTGAAATTGGAATCAATGGGA  
 CY021957 CAGAGAGGAGATAGATGGAGTAAAGTTGGAGTCAACAAGA  
 JX046926 CAGAGAAGAAATAGATGGGGTAAAGCTGGAATCAACAAGG  
 CY049987 CAGAGAAGAAATAGATGGGGTAAAGCTGGAATCAACAAGG  
 GQ132138.1| CAGAGAAGAAATAGATGGGGTAAAGCTGGAATCAACAAGG

1681

CY080523 AAAGACTGGATCCTGTGGATTTCTTTGCCATATCATGCT  
 CY118914 AAAGATTGGATCCTATGGATTTCTTTGCCATATCATGTT  
 CY113365 AAAGACTGGATCCTATGGATTTCTTTGCCATATCATGCT  
 CY112837 AAAGATTGGATCCTATGGATTTCTTTGCCATATCATGCT  
 AJ404626 ACTTACAAAATCCTCACCATTATTCGACTGTGCGCCTCAT  
 CY087800 GTTTATCAAATCCTTGCCATTATGCTACAGTAGCAGGTT  
 CY032261 GTTTACCAAATTTCTTGCCATTTATGCTACAGTAGCAGGTT  
 AF116575 -----  
 CY006667 GTCTATCAGATTCTGGCGATCTACTCAACTGTCGCCAGTT  
 CY009604 GTCTATCAGATTCTGGCGATCTACTCAACTGTCGCCAGTT  
 CY020445 GTCTATCAGATTCTGGCGATCTACTCAACTGTCGCCAGTT  
 CY045772 GTCTATCAGATTCTGGCGATCTACTCAACTGTCGCCAGTT  
 CY009340 GTCTATCAGATTCTGGCGATCTACTCAACTGTCGCCAGTT  
 CY013271 GTCTATCAGATTCTGGCGATCTACTCAACTGTCGCCAGTT  
 CY010372 GTCTATCAGATTCTGGCGATCTACTCAACTGTCGCCAGTT  
 CY021037 GTCTATCAGATTCTGGCGATCTACTCAACTGTCGCCAGTT  
 CY021957 ATTTACCAGATTTTGGCGATCTATTCAACTGTCGCCAGTT  
 JX046926 ATTTACCAGATTTTGGCGATCTATTCAACTGTCGCCAGTT  
 CY049987 ATTTACCAGATTTTGGCGATCTATTCAACTGTCGCCAGTT  
 GQ132138.1| TTTTACCAGATTTTGGCGATCTATTCAACTGTCGCCAGTT

1721

CY080523 TTTTGCTTTGTGTGTGTTTGCTGGGGTTCATCA---TGTG  
 CY118914 TTTTGCTTTGTGTGTGTTTGCTGGGGTTCATCA---TGTG  
 CY113365 TTTTGCTTTGTGTGTGTTTGCTGGGGTTCATCA---TGTG  
 CY112837 TTTTGCTTTGTGTGTGTTTGCTGGGGTTCATCA---TGTG  
 AJ404626 CTCTTGTGCTTGCAATGGGGTTTGCTGCCCTTCCCTGTTCTG  
 CY087800 CTCTGTCACTGGCAATCATGATGGCTGGGATCTCTTTCTG  
 CY032261 CTCTGTCACTGGCAATCATGATGGCTGGGATCTCTTTCTG  
 AF116575 -----  
 CY006667 CCCTGGTCTTTTTGGTCTCCCTGGGGGCAATCAGCTTCTG  
 CY009604 CACTGGTGCTTTTTGGTCTCCCTGGGGGCAATCAGTTTCTG  
 CY020445 CACTGGTGCTTTTTGGTCTCCCTGGGGGCAATCAGTTTCTG  
 CY045772 CACTGGTGCTTTTTGGTCTCCCTGGGGGCAATCAGTTTCTG  
 CY009340 CACTGGTGCTTTTTGGTCTCCCTGGGGGCAATCAGTTTCTG  
 CY013271 CACTGGTGCTTTTTGGTCTCCCTGGGGGCAATCAGTTTCTG  
 CY010372 CACTGGTGCTTTTTGGTCTCCCTGGGGGCAATCAGTTTCTG  
 CY021037 CACTGGTGCTTTTTGGTCTCCCTGGGGGCAATCAGTTTCTG  
 CY021957 CATTGGTACTGTTGGTCTCCCTGGGGGCAATCAGTTTCTG  
 JX046926 CATTGGTACTGCTAGTCTCCCTGGGGGCAATCAGTTTCTG  
 CY049987 CATTGGTACTGGTAGTCTCCCTGGGGGCAATCAGTTTCTG  
 GQ132138.1| CATTGGTACTGGTAGTCTCCCTGGGGGCAATCAGTTTCTG

1761

CY080523 GGCCTGCCAGAGAGGCAACATTAGGTGCAACATTTGCATT  
 CY118914 GGCCTGCCAAAAAGGCAACATTAGGTGCAACATTTGCATT  
 CY113365 GGCCTGCCAAAAAGGCAACATTAGGTGCAACATTTGCATT  
 CY112837 GGCCTGCCAAAAAGGCAACATTAGGTGCAACATTTGCATT  
 AJ404626 GGCCATGTCCAATGGATCTTGCAAGTGCAGATTTGTATA  
 CY087800 GATGTGCTCCAACGGGTCTCTGCAGTGCAGGATCTGCATA  
 CY032261 GATGTGCTCCAACGGGTCTCTGCAGTGCAGAATCTGCATA  
 AF116575 -----  
 CY006667 GATGTGTTCCAATGGGTCTTTGCAGTGTAGAATATGCATC  
 CY009604 GATGTGTTCTAATGGGTCTTTGCAGTGCAGAATATGCATC  
 CY020445 GATGTGTTCTAATGGATCTTTGCAGTGCAGAATATGCATC  
 CY045772 GATGTGTTCTAATGGGTCTTTGCAGTGCAGAATATGCATC  
 CY009340 GATGTGTTCCAATGGGTCTTTGCAATGCAGAATATGCATC  
 CY013271 GATGTGTTCTAATGGGTCTTTGCAGTGCAGAATATGCATC  
 CY010372 GATGTGTTCTAATGGGTCTTTGCAGTGCAGAATATGCATC  
 CY021037 GATGTGTTCTAATGGGTCTTTGCAGTGCAGAATATGCATC  
 CY021957 GATGTGCTCTAATGGGTCTTTACAGTGCAGAATATGTATT  
 JX046926 GATGTGCTCTAATGGGTCTCTACAGTGTAGAATATGTATT  
 CY049987 GATGTGCTC---TTGGTCTCTACAGTGTAGAATATGTATT  
 GQ132138.1| GATGTGCTCTAATGGGTCTCTACAGTGTAGAATATGTATT

1801

|            |                                     |  |
|------------|-------------------------------------|--|
| CY080523   | TGAGTGTATTAGTAAATTAAAAACAC          |  |
| CY118914   | TGAGTGCATT--AAATTAAAAAC             |  |
| CY113365   | TGAGTGCATT--AAATTAAAAA              |  |
| CY112837   | TGAGTGCATT--AAATTAAAAAC             |  |
| AJ404626   | TAA                                 |  |
| CY087800   | TGATTATAAGTCATTTTATAAATTAAAAACAC    |  |
| CY032261   | TGATTCTAAGTCATTTTCTAATTAA           |  |
| AF116575   |                                     |  |
| CY006667   | TAAGACCAGA--ATTTCAGAAATATAAGGAAAAA  |  |
| CY009604   | TGAGATTAGG--ATTTCAGAAATATAAGGAAAAA  |  |
| CY020445   | TGAGATTAGA--ATTTCAGAAATATAA         |  |
| CY045772   | TGAGATTAGA--ATTTCAGAAATATAAGGAA     |  |
| CY009340   | TGAGACCAGA--ATTTCAGAAATATAAGGAAAAAA |  |
| CY013271   | TGAGACCAGG--ATTTCAAAAAATATAA        |  |
| CY010372   | TGAGACCAGA--ATTTCAGAAATATAAGAAAAAAA |  |
| CY021037   | TGAGACCAGA--ATTTCAGAAATATAAGAAAAAAA |  |
| CY021957   | TAAAACTAGG--ATT                     |  |
| JX046926   | TAA                                 |  |
| CY049987   | TAA                                 |  |
| GQ132138.1 | TAACATTAGG--ATTTCAGAAAGCATGAGA      |  |
