# Supplementary material
Source: MDPI journal article supplement (https://www.mdpi.com/1099-4300/15/8/3065)
Supplement: s1 [file s1]

1  
JX046930 -----ATGGACTCCAAACAC  
CY049991 -----ATGGACTCCAAACAC  
GQ132138.1| -----ACAAAAACATAATGGACTCCAAACAC  
AJ278649 AAGCAAAAGGAGGGTGACAAAGACATAATGGATTCCAAACAC  
CY118918 -----ACAAAAACATAATGGATTCCAAACAC  
CY113369 -----ACAAAGACATAATGGATTCCAAACAC  
CY112841 -----ACAAAGACATAATGGATTCCAAACAC  
CY006671 -----GGTGGCAAAGACATAATGGATTCCCAACAC  
CY032265 -----AAGACATAATGGATTCTAACAC  
CY080527 -----CTGACAAAGACATAATGGATTCTAACAC  
CY021041 -----TGGCAAAGACATAATGGATCCCAACAC  
CY013275 -----AGACATAATGGATCCCAACAC  
CY087804 -----CTGACAAAGACATAATGGATCCCTAACAC  
CY009344 -----TGACAAAGACATAATGGATCCCAACAC  
CY010376 -----TGGCAAAGACATAATGGATCCCAACAC  
AF333238 -----ATGGATTCCAAACAC  
CY045776 -----ATGGATCCCAACAC  
CY009608 -----TGACAAAGACATAATGGATCCAAACAC  
CY020449 -----ATAATGGATCCAAACAC  
CY021961 -----AACATAATGGATCCAAACAC

41  
JX046930 CATGTCAAGCTTTTCAGGTAGACTGTTTCCTTTGGCATATC  
CY049991 CATGTCAAGCTTTTCAGGTAGACTGTTTCCTTTGGCATATC  
GQ132138.1| CATGTCAAGCTTTTCAGGTAGACTGTTTCCTTTGGCATATC  
AJ278649 TGTGTCAAGCTTTTCAGGTAGACTGTTTCCTTTGGCATGTC  
CY118918 TGTGTCAAGCTTTTCAGGTAGATTGCTTTCTTTGGCATATC  
CY113369 TGTGTCAAGCTTTTCAGGTAGATTGCTTTCTTTGGCATATC  
CY112841 TGTGTCAAGCTTTTCAGGTAGATTGCTTTCTTTGGCATATC  
CY006671 TGTGTCAAGCTTTTCAGGTAGATTGCTTTCCTTTGGCATGTC  
CY032265 TGTGTCAAGCTTTTCAGGTAGATTGCTTTCCTTTGGCATGTC  
CY080527 TGTGTCAAGCTTTTCAGGTAGATTGCTTTCCTTTGGCATGTC  
CY021041 TGTGTCAAGCTTTTCAGGTAGATTGCTTTCCTTTGGCATGTC  
CY013275 TGTGTCAAGCTTTTCAGGTAGATTGCTTTCCTTTGGCATGTC  
CY087804 TGTGTCAAGCTTTTCAGGTAGATTGCTTTCCTTTGGCATGTC  
CY009344 TGTGTCAAGCTTTTCAGGTAGATTGCTTTCCTTTGGCATGTC  
CY010376 TGTGTCAAGCTTTTCAGGTAGATTGCTTTCCTTTGGCATGTC  
AF333238 TGTGTCAAGCTTTTCAGGTAGACTGCTTTCTTTGGCATGTC  
CY045776 TGTGTCAAGCTTTTCAGGTAGATTGCTTTCTTTGGCATGTC  
CY009608 TGTGTCAAGCTTTTCAGGTAGATTGCTTTCCTTTGGCATGTC  
CY020449 TGTGTCAAGCTTTTCAGGTAGATTGCTTTCTTTGGCATGTC  
CY021961 TGTGTCAAGCTTTTCAGGTAGATTGCTTTCTTTGGCATGTC

81  
JX046930 CGCAAGCGGTTTGCAGACAAATGGATTGGGTGATGCCCCAT  
CY049991 CGCAAGCGATTTTGCAGACAAATGGATTGGGTGATGCCCCAT  
GQ132138.1| CGCAAGCGATTTTGCAGACAAATGGATTGGGTGATGCCCCAT  
AJ278649 CGCAAAACGATTTGCAGACCAAGAACTGGGTGATGCCCCAT  
CY118918 CGGAAAACAAGTTGTAGACCAAGAACTGAGTGATGCCCCAT  
CY113369 CGAAAAACAAGTTGTAGACCAAGAACTGAGTGATGCCCCAT  
CY112841 CGGAAAACAAGTTGTAGACCAAGAACTGAGTGATGCCCCAT  
CY006671 CGCAAAACAAGTTGCAGACCAAGATCTAGGCGATGCCCCCT  
CY032265 CGAAAAACAAGTTGTAGACCAAGAACTAGGTGATGCCCCAT  
CY080527 CGAAAAACAAGTTGTAGACCAAGAACTAGGTGATGCCCCAT  
CY021041 CGCAAAACAAGTTGCAGACCAAGAGCTAGGTGATGCCCCAT  
CY013275 CGCAAAACGAGTTGCAGACCAAGAACTAGGTGATGCCCCAT  
CY087804 CGCAAAACAAGTTGCAGACCAAGAACTAGGTGATGCCCCAT  
CY009344 CGCAAAACAAGTTGCAGACCAAGAACTAGGTGATGCCCCAT  
CY010376 CGCAAAACAAGTTGCAGACCAAGAACTAGGTGATGCCCCAT  
AF333238 CGCAAAACGGTTTGCAGACCAAGAACTGGGTGATGCCCCAT  
CY045776 CGCAAAACGAGTTGCAGACCAAGAACTAGGTGATGCCCCAT  
CY009608 CGCAAAACGAGTTGCAGACCAAGAACTAGGTGATGCCCCAT  
CY020449 CGCAAAACGAGTTGCAGACCAAGAACTAGGTGATGCCCCAT  
CY021961 CGCAAAACGAGTTGCAGACCAAGAACTAGGTGATGCCCCAT

121

JX046930 TCCTTGATCGGCTCCGCCGAGATCAAAAGTCCTTAAAAAGG  
 CY049991 TCCTTGATCGGCTCCGCCGAGATCAAAAGTCCTTAAAAAGG  
 GQ132138.1| TCCTTGATCGGCTCCGCCGAGATCAAAAGTCCTTAAAAAGG  
 AJ278649 TCCTTGATCGGCTCCGCCGAGATCAGAAGTCCCTAAGGGG  
 CY118918 TCCTTGATCGGCTCCGCCGAGATCAGAAGTCCCTAAGGGG  
 CY113369 TCCTTGATCGGCTCCGCCGAGATCAGAAGTCCCTAAGGGG  
 CY112841 TCCTTGATCGGCTCCGCCGAGATCAGAAGTCCCTAAGGGG  
 CY006671 TCCTTGATCGGCTCCGCCGAGATCAGAAGTCCCTAAGGGG  
 CY032265 TCCTTGATCGGCTCCGCCGAGATCAGAAGTCCCTAAGGGG  
 CY080527 TCCTTGATCGGCTCCGCCGAGATCAGAAGTCCCTAAGGGG  
 CY021041 TCCTTGATCGGCTCCGCCGAGATCAGAAGTCCCTAAGGGG  
 CY013275 TCCTTGATCGGCTCCGCCGAGATCAGAAGTCCCTAAGGGG  
 CY087804 TCCTTGATCGGCTCCGCCGAGATCAGAAGTCCCTAAGGGG  
 CY009344 TCCTTGATCGGCTCCGCCGAGATCAGAAGTCCCTAAGGGG  
 CY010376 TCCTTGATCGGCTCCGCCGAGATCAGAAGTCCCTAAGGGG  
 AF333238 TCCTTGATCGGCTCCGCCGAGATCAGAAGTCCCTAAGAGG  
 CY045776 TCCTTGATCGGCTCCGCCGAGATCAGAAGTCCCTAAGAGG  
 CY009608 TCCTTGATCGGCTCCGCCGAGATCAGAAATCCCTAAGAGG  
 CY020449 TCCTTGATCGGCTCCGCCGAGATCAGAAATCCCTAAGAGG  
 CY021961 TCCTTGATCGGCTCCGCCGAGATCAGAAATCCCTAAGAGG

161

JX046930 AAGAGGCAACACCCTTGGCCTCGATATCGAAACAGCCACT  
 CY049991 AAGAGGCAACACCCTTGGCCTCGATATCGAAACAGCCACT  
 GQ132138.1| AAGAGGCAACACCCTTGGCCTCGATATCGAAACAGCCACT  
 AJ278649 AAGAGGCAGCACTCTCGGTCTGGACATCAGAACTGCCACT  
 CY118918 AAGAGGCAATACTCTCGGTCTAGACATCAAAGCAGCCACC  
 CY113369 AAGAGGCAACACTCTCGGTCTAGACATCAAAGCAGCCACC  
 CY112841 AAGAGGCAACACTCTCGGTCTAGACATCAAAGCAGCCACC  
 CY006671 AAGAGGCAGCACTCTCGGTCTGAACATCGAAACAGCCACT  
 CY032265 AAGAGGCAGCACTCTCGGTCTAAACATCGAAGCAGCCACC  
 CY080527 AAGAGGCAGCACTCTCGGTCTAAACATCGAAGCAGCCACC  
 CY021041 AAGAGGCAGCACTCTCGGTCTGGACATCGAAACAGCCACC  
 CY013275 AAGAGGCAGCACTCTCGGTCTGAACATCGAAACAGCCACC  
 CY087804 AAGAGGCAGTACTCTCGGTCTGAACATCGAAACAGCCACC  
 CY009344 AAGAGGCAGCACTCTCGGTCTGAACATCGAAACAGCCACC  
 CY010376 AAGAGGCAGCACTCTCGGTCTGAACATCGAAACAGCCACC  
 AF333238 AAGAGGCAGCACTCTTGGTCTGGACATCGAGACAGCCACC  
 CY045776 AAGAGGCAGCACTCTCGGTCTGGACATCGAGACAGCCACC  
 CY009608 AAGAGGCAGCACTCTCGGTCTGGACATCGAAACAGCCACC  
 CY020449 AAGGGGCAGCACTCTCGGTCTGGACATCGAGACAGCCACA  
 CY021961 AAGGGGCAGTACTCTCGGTCTGGACATCGAGACAGCCACA

201

JX046930 CTTGTTGGGAAACAAATCGTGGAAATGGATCTTGAAAGAGG  
 CY049991 CTTGTTGGGAAACAAATCGTGGAAATGGATCTTGAAAGAGG  
 GQ132138.1| CTTGTTGGGAAACAAATCGTGGAAATGGATCTTGAAAGAGG  
 AJ278649 CGTGAAGGAAAGCAGATAGTAGAGAGGATTCTGAAGGAAG  
 CY118918 CATGTTGGAAAGCAAATGTAGAAAAGATTCTGAAAGAAG  
 CY113369 CATGTTGGAAAGCAGATAGTAGAAAAGATTCTGAAGGAAG  
 CY112841 CATGTTGGAAAGCAGATTGTAGAAAAGATTCTGAAGGAAG  
 CY006671 TGTGTTGGAAAGCAAATAGTAGAGAGGATTCTGAAAGAAG  
 CY032265 CGTGTGTTGGAAAGCAGATAGTAGAGAGGATTCTGAAGGAAG  
 CY080527 CGTGTGTTGGAAAGCAGATAGTAGAGAGGATTCTGAAGGAAG  
 CY021041 TGTGTTGGAAAGCAAATAGTAGAGAGGATTCTGAAGGAAG  
 CY013275 CGTGTGTTGGAAAGCAGATAGTAGAGAGGATTCTGAAGGAAG  
 CY087804 CGTGTGTTGGAAAGCAGATAGTAGAGAGGATTCTGAAGGAAG  
 CY009344 CGTGTGTTGGAAAGCAGATAGTAGAGAGGATTCTGAAGGAAG  
 CY010376 TGTGTTGGAAAGCAAATAGTAGAGAGGATTCTGAAGGAAG  
 AF333238 CGTGCTGGAAAGCAGATAGTAGAGCGGATTCTGAAGGAAG  
 CY045776 CGTGCTGGAAAGCAGATAGTAGAGCGGATTCTGGAGGAAG  
 CY009608 CGTGCTGGAAAGCAAATAGTAGAGCGGATTCTGAAGGAAG  
 CY020449 CGTGCTGGAAAGCAGATAGTAGAGCGGATTCTGAAGGAAG  
 CY021961 CGTGCTGGAAAGCAGATAGTAGAGCGGATTCTGAAAGAAG

241

JX046930 AATCCAGCGAGACACTTAGAATGACAAATGCACTCTGTACC  
 CY049991 AATCCAGCGAGACACTTAGAATGACAAATGCACTCTGTACC  
 GQ132138.1 | AATCCAGCGAGACACTTAGAATGACAAATGCACTCTGTACC  
 AJ278649 AATCTGATGAGGCACTTAAAAATGACCATGGCTCTCCACACC  
 CY118918 AATCTGATGAGGCACTTAAAAATGACCATGGCTCTCCACACC  
 CY113369 AATCTGATGAGGCACTTAAAAATGACCATGGCTCTCCACACC  
 CY112841 AATCTGATGAGGCACTTAAAAATGACCATGGCTCTCCACACC  
 CY006671 AATCCGATGAGGCATTTAAAAATGACCATGGCTCTCCGCACT  
 CY032265 AATCCGATGAGGCATTTAAAAATGACCATGGCTCTCCGCACT  
 CY080527 AATCCGATGAGGCATTTAAAAATGACCATGGCTCTCCGCACT  
 CY021041 AATCCGATGAGGCATTTAAAAATGACCATGGCTCTCCGCACT  
 CY013275 AATCCGATGAGGCATTTAAAAATGACCATGGCTCTGCACT  
 CY087804 AATCCGATGAGGCATTTAAAAATGACCATGGCTCTGCACT  
 CY009344 AATCCGATGAGGCATTTAAAAATGACCATGGCTCTGCACT  
 CY010376 AATCCGATGAGGCATTTAAAAATGACCATGGCTCTGCACT  
 AF333238 AATCCGATGAGGCATTTAAAAATGACCATGGCTCTGTACC  
 CY045776 AATCCGATGAGGCATTTAAAAATGACCATGGCTCTGTACC  
 CY009608 AATCCGATGAGGCATTTAAAAATGACCATGGCTCTGTACC  
 CY020449 AATCCGATGAGGCATTTAAAAATGACCATGGCTCTGTACC  
 CY021961 AATCCGATGAGGCATTTAAAAATGACCATGGCTCTGTACC

281

JX046930 TACTTCGCGTTACCTTTCTGACATGACCCCTCGAGGAAATG  
 CY049991 TACTTCGCGTTACCTTTCTGACATGACCCCTCGAGGAAATG  
 GQ132138.1 | TACTTCGCGTTACCTTTCTGACATGACCCCTCGAGGAAATG  
 AJ278649 TGCTTCGCGTACCTAACTGAAATGACTCTTGAGGAAATG  
 CY118918 TGCTTCGCGTACCTAACTGAAATGACTCTTGAGGAAATG  
 CY113369 TGCTTCGCGTACCTAACTGAAATGACTCTTGAGGAAATG  
 CY112841 TGCTTCGCGTACCTAACTGAAATGACTCTTGAGGAAATG  
 CY006671 TGCTTCGCGGTACCTAACTGACATGACTCTTGAGGAAATG  
 CY032265 TGCTTCGCGTACCTAACTGACATGACTCTTGAGGAAATG  
 CY080527 TGCTTCGCGTACCTAACTGACATGACTCTTGAGGAAATG  
 CY021041 TGCTTCGCGTACCTAACTGACATGACTCTTGAGGAAATG  
 CY013275 TGCTTCGCGTACCTAACTGACATGACTCTTGAGGAAATG  
 CY087804 TGCTTCGCGTACCTAACTGACATGACTCTTGAGGAAATG  
 CY009344 TGCTTCGCGTACCTAACTGACATGACTCTTGAGGAAATG  
 CY010376 TGCTTCGCGTACCTAACTGACATGACTCTTGAGGAAATG  
 AF333238 TGCTTCGCGTACCTAACTGACATGACTCTTGAGGAAATG  
 CY045776 TGCGTCGCGTACCTAACTGACATGACTCTTGAGGAAATG  
 CY009608 TGCGTCGCGTACCTAACTGACATGACTCTTGAGGAAATG  
 CY020449 TGCGTCGCGTACCTAACTGACATGACTCTTGAGGAAATG  
 CY021961 TGCGTCGCGTACCTAACTGACATGACTCTTGAGGAAATG

321

JX046930 TCACGAGACTGGTTTCATGCTCATGCCAAGCAGAAAGTGA  
 CY049991 TCACGAGACTGGTTTCATGCTCATGCCAAGCAGAAAGTGA  
 GQ132138.1 | TCACGAGACTGGTTTCATGCTCATGCCAAGCAGAAAGTGA  
 AJ278649 TCAAGGGACTGGTTTCATGCTCATGCCAAGCAGAAAGTGA  
 CY118918 TCAAGGGACTGGTTTCATGCTCATGCCAAGCAGAAAGTGA  
 CY113369 TCAAGGGACTGGTTTCATGCTCATGCCAAGCAGAAAGTGA  
 CY112841 TCAAGGGACTGGTTTCATGCTCATGCCAAGCAGAAAGTGA  
 CY006671 TCAAGGGACTGGTTTCATGCTCATGCCAAGCAGAAAGTGA  
 CY032265 TCAAGGGACTGGTTTCATGCTCATGCCAAGCAGAAAGTGA  
 CY080527 TCAAGGGACTGGTTTCATGCTCATGCCAAGCAGAAAGTGA  
 CY021041 TCAAGGGACTGGTTTCATGCTCATGCCAAGCAGAAAGTGA  
 CY013275 TCAAGGGACTGGTTTCATGCTCATGCCAAGCAGAAAGTGA  
 CY087804 TCAAGGGACTGGTTTCATGCTCATGCCAAGCAGAAAGTGA  
 CY009344 TCAAGGGACTGGTTTCATGCTCATGCCAAGCAGAAAGTGA  
 CY010376 TCAAGGGACTGGTTTCATGCTCATGCCAAGCAGAAAGTGA  
 AF333238 TCAAGGGACTGGTTTCATGCTCATGCCAAGCAGAAAGTGA  
 CY045776 TCAAGGGACTGGTTTCATGCTCATGCCAAGCAGAAAGTGA  
 CY009608 TCAAGGGACTGGTTTCATGCTCATGCCAAGCAGAAAGTGA  
 CY020449 TCAAGGGACTGGTTTCATGCTCATGCCAAGCAGAAAGTGA  
 CY021961 TCAAGGGACTGGTTTCATGCTCATGCCAAGCAGAAAGTGA

361

JX046930 TAGGCCCTCTTTGCGTGGATTGGACCAGGCGGTCATGGA  
CY049991 TAGGCCCTCTTTGCGTGGATTGGACCAGGCGATCATGGA  
GQ132138.1 | TAGGCCCTCTTTGCGTGGATTGGACCAGGCGATCATGGA  
AJ278649 CAGGGCCCCCTTTGCATTAGAATGGACCAGGCGAATGGA  
CY118918 AAGGACCTCTTTGCATCAGAATGGACCAGGCAATCATGGA  
CY113369 AAGGACCTCTTTGCATCAGAACGGACCAGGCAATCATGGA  
CY112841 AAGGACCCCTTAGCATCAGAATGGACCAGGCAATCATGGA  
CY006671 CTGGCCCTCTTTGTGTCAGAATGGACCAGGCGATAATGGA  
CY032265 AAGGCCCTCTTTGCATCAGAATAGACCAGGCAATCATGGA  
CY080527 AAGGACCTCTTTGCATCAGAATAGACCAGGCAATCATGGA  
CY021041 CAGGCCCTCTTTGTGTCAGAATGGACCAGGCGATAATGGA  
CY013275 CAGGCCCTCTTTGTATCAGAATGGACCAGGCGGTCATGGA  
CY087804 CAGGCCCTCTTTGTATCAGAATGGACCAGGCAATCATGGA  
CY009344 CAGGCCCTCTTTGTATCAGAATGGACCAGGCGATCATGGA  
CY010376 CAGGCCCTCTTTGTATCAGAATGGACCAGGCGATAATGGA  
AF333238 CAGGCTCTCTTTGTATCAGAATGGACCAGGCGATCATGGA  
CY045776 CAGGCCCTCTTTGTATCAGAATGGACCAGGCGATCATAGA  
CY009608 CAGGCCCTCTTTGTATCAGAATGGACCAGGCGATCATGGA  
CY020449 CAGGCCCTCTTTGTATCAGAATGGACCAGGCGATCATGGA  
CY021961 CAGGCCCTCTTTGTATCAGAATGGACCAGGCGATCATGGA

401

JX046930 AAAGAACATAGTACTGAAAGCGAACTTCAGTGTAAATCTTC  
CY049991 AAAGAACATAGTACTGAAAGCGAACTTCAGTGTAAATCTTT  
GQ132138.1 | AAAGAACATAGTACTGAAAGCGAACTTCAGTGTAAATCTTT  
AJ278649 TAAAAACCATCATATTGAAAGCGAACTTTAGTGTGATTTTT  
CY118918 GAAAAACATCATGTTGAAAGCGAATTTTCAGTGTGATTTTT  
CY113369 GAAAAACATCATGTTGAAAGCGAATTTTCAGTGTGATCTTT  
CY112841 GAAAAACATCATGTTGAAAGCGAATTTTCAGTGTGATCTTT  
CY006671 TAAGAACATCATACTGAAAGCGAATTTTCAGTGTGATTTTT  
CY032265 TAAGAACATCATGTTGAAAGCGAATTTTCAGTGTGATTTTT  
CY080527 TAAGAACATCATGTTGAAAGCGAATTTTCAGTGTGATTTTT  
CY021041 TAAGAACATCATACTGAAAGCGAATTTTCAGTGTGATTTTT  
CY013275 TAAGAGCATCATACTGAAAGCGAATTTTCAGTGTGATTTTT  
CY087804 TAAGAACATCATAATTGAAAGCGAATTTTCAGTGTGATTTTT  
CY009344 TAAGAACATCATACTGAAAGCGAATTTTCAGTGTGATTTTT  
CY010376 TAAGAACATCATACTGAAAGCGAATTTTCAGTGTGATTTTT  
AF333238 TAAGAACATCATACTGAAAGCGAACTTCAGTGTGATTTTT  
CY045776 TAAGAACATCATACTGAAAGCGAACTTCAGTGTGATTTTT  
CY009608 TAAGAACATCATACTGAAAGCGAACTTCAGTGTGATTTTT  
CY020449 TAAGAACATCATACTGAAAGCGAACTTCAGTGTGATTTTT  
CY021961 TAAGAACATCATACTGAAAGCGAACTTCAGTGTGATTTTT

441

JX046930 AACCgATTAGAGACCTTGATACTACTAAGGGCTTTCACTG  
CY049991 AACCgATTAGAGACCTTGATACTACTAAGGGCTTTCACTG  
GQ132138.1 | AACCgATTAGAGACCTTGATACTACTAAGGGCTTTCACTG  
AJ278649 AATCGACTTGAAAGCTCTGATACTACTTAGAGCGTTTACAG  
CY118918 GACCGACTAGAGACCATAGTATTACTAAGGGCTTTCAACG  
CY113369 GACCGACTAGAGACCTAGTATTACTAAGGGCTTTCAACG  
CY112841 GACCGACTAGAGACCTAGTATTACTAAGGGCTTTCAACG  
CY006671 GACCGGTTGGAGACTCTGATACTACTAAGGGCTTTCAACG  
CY032265 GACCGGCTAGAGACCTAATAATTACTAAGGGCTTTCAACG  
CY080527 GACCGGCTAGAGACCTAATAATTACTAAGGGCTTTCAACG  
CY021041 AACCgGTTGGAGACTCTGATACTACTAAGGGCTTTCAACG  
CY013275 GACCGGCTGGAGACTCTAATAATTACTAAGGGCTTTCAACG  
CY087804 GACCGGCTAGAGACCTAATAATTACTAAGGGCTTTCAACG  
CY009344 GACCGGCTGGAGACTCTAATAATTACTAAGGGCTTTCAACG  
CY010376 GACCGGCTGGAGACTCTAATAATTACTAAGGGCTTTCAACG  
AF333238 GACCGGCTGGAGACTCTAATACTACTAAGGGCTTTCAACG  
CY045776 GACCAACTGGAGACTCTAATAATTACTAAGGGCTTTCAACG  
CY009608 GACCGGCTGGAGACTCTAATAATTACTAAGGGCTTTCAACG  
CY020449 GACCGGCTGGAGACTCTAATAATTGCTAAGGGCTTTCAACG  
CY021961 GACCGGCTGGAGACTCTAATAATTGCTAAGGGCTTTCAACG

481

JX046930 AGGAGGGAGCAATAGTTGGAGAAATTTCAACCATTAACCTTC  
CY049991 AGGAGGGAGCAATAGTTGGAGAAATTTCAACCATTAACCTTC  
GQ132138.1 | AGGAGGGAGCAATAGTTGGAGAAATTTCAACCATTAACCTTC  
AJ278649 ATTGAAGGAGCAATAGTTGGGCGAAATCTCACCATTACCTTC  
CY118918 AAGAGGGAGCAATTGTTGGGCGAAATCTCACCATTGCCTTC  
CY113369 AAGAGGGAGCAATTGTTGGGCGAAATCTCACCATTGCCTTC  
CY112841 AAGAGGGAGCAATTGTTGGGCGAAATCTCACCATTGCCTTC  
CY006671 AAGAGGGAGCAATTGTTGGGCGAAATTTCAACCATTAACCTTC  
CY032265 AAGAGGGAGCAATTGTTGGGCGAAATTTCAACCATTAACCTTC  
CY080527 AAGAGGGAGCAATTGTTGGGCGAAATCTCACCATTGCCTTC  
CY021041 AAGAGGGAGCAATTGTTGGGCGAAATTTCAACCATTAACCTTC  
CY013275 AAGAGGGAGCAATTGTTGGGCGAAATTTCAACCATTAACCTTC  
CY087804 AAGAGGGAGCAATTGTTGGGCGAAATTTCAACCATTAACCTTC  
CY009344 AAGAGGGAGCAATTGTTGGGCGAAATTTCAACCATTAACCTTC  
CY010376 AAGAGGGAGCAATTGTTGGGCGAAATTTCAACCATTAACCTTC  
AF333238 AAGAGGGAGCAATTGTTGGGCGAAATTTCAACCATTAACCTTC  
CY045776 AAGAGGGAGCAATTGTTGGGCGAAATTTCAACCATTAACCTTC  
CY009608 AAGAGGGAGCAATTGTTGGGCGAAATTTCAACCATTAACCTTC  
CY020449 AAGAGGGAGCAATTGTTGGGCGAAATTTCAACCATTAACCTTC  
CY021961 AAGAGGGAGCAATTGTTGGGCGAAATTTCAACCATTAACCTTC

521

JX046930 TCTTCCAGGACATACTTATGAGGATGTCAAAAATGCAGTT  
CY049991 TCTTCCAGGACATACTTATGAGGATGTCAAAAATGCAGTT  
GQ132138.1 | TCTTCCAGGACATACTTATGAGGATGTCAAAAATGCAGTT  
AJ278649 CCTTCCAGGACATACTGACGAGGATGTCAAAAATGCAATT  
CY118918 TTTTCCAGGACATACTATTGAGGATGTCAAAAATGCAATT  
CY113369 TTTTCCAGGACATACTATTGAGGATGTCAAAAATGCAATT  
CY112841 TTTTCCAGGACATACTATTGAGGATGTCAAAAATGCAATT  
CY006671 TTTTCCAGGACATACTAATGAGGATGTCAAAAATGCAATT  
CY032265 TCTTCCAGGACATACTATTGAGGATGTCAAAAATGCAATT  
CY080527 TCTTCCAGGACATACTATTGAGGATGTCAAAAATGCAATT  
CY021041 TCTTCCAGGACATACTAATGAGGATGTCAAAAATGCAATT  
CY013275 TCTTCCAGGACATACTAATGAGGATGTCAAAAATGCAATT  
CY087804 TCTTCCAGGACATACTAATGAGGATGTCAAAAATGCAATT  
CY009344 TCTTCCAGGACATACTAATGAGGATGTCAAAAATGCAATT  
CY010376 TCTTCCAGGACATACTAATGAGGATGTCAAAAATGCAATT  
AF333238 TCTTCCAGGACATACTGATGAGGATGTCAAAAATGCAGTT  
CY045776 TCTTCCAGGACATACTGGTGAGGATGTCAAAAATGCAATT  
CY009608 TCTTCCAGGACATACTGATGAGGATGTCAAAAATGCAGTT  
CY020449 TCTTCCAGGACATACTGATGAGGATGTCAAAAATGCAGTT  
CY021961 TCTTCCAGGACATACTGOTGAGGATGTCAAAAATGCAGTT

561

JX046930 GGGGTTCCTCATCGGAGGACTTGAATGGAATGGTAACACGG  
CY049991 GGGGTTCCTCATCGGAGGACTTGAATGGAATGGTAACACGG  
GQ132138.1 | GGGGTTCCTCATCGGAGGACTTGAATGGAATGGTAACACGG  
AJ278649 GGGGTTCCTCATCGGAGGACTTGAATGGAATGATAACACAG  
CY118918 GGGGTTCCTCATCGGAGGACTTGAATGGAATGATAACACAG  
CY113369 GGGGTTCCTCATCGGAGGACTTGAATGGAATGATAACACAG  
CY112841 GGGGTTCCTCATCGGAGGACTTGAATGGAATGATAACACAG  
CY006671 GGGGTTCCTCATCGGGGACTTGAATGGAATGATAACACAG  
CY032265 GGGGTTCCTCATCGGAGGACTTGAATGGAATGATAACACAG  
CY080527 GGGGTTCCTCATCGGAGGACTTGAATGGAATGATAACACAG  
CY021041 GGGGTTCCTCATCGGGGACTTGAATGGAATGATAACACAG  
CY013275 GGAGTTCCTCATCGGAGGACTTGAATGGAATGATAACACAG  
CY087804 GGGGTTCCTCATCGGAGGACTTGAATGGAATGATAACACAG  
CY009344 GGGGTTCCTCATCGGAGGACTTGAATGGAATGATAACACAG  
CY010376 GGGGTTCCTCATCGGAGGACTTGAATGGAATGATAACACAG  
AF333238 GGGGTTCCTCATCGGAGGACTTGAATGGAATGATAACACAG  
CY045776 GGGGTTCCTCATCGGAGGACTTGAATGGAATGATAACACAG  
CY009608 GGGGTTCCTCATCGGAGGACTTGAATGGAATGATAACACAG  
CY020449 GGGGTTCCTCATCGGAGGACTTGAATGGAATGATAACACAG  
CY021961 GGAGTTCCTCATCGGAGGACTTGAATGGAATGATAACACAG

601

JX046930 TTTCGAGTCTCTGAAAAATATACAGAGATTTCGCTTGGAGAAA  
CY049991 TTTCGAGTCTCTGAAAAATATACAGAGATTTCGCTTGGAGAAA  
GQ132138.1| TTTCGAGTCTCTGAAAAATATACAGAGATTTCGCTTGGAGAAA  
AJ278649 TTTCGAGTCTCTGAAACTCTACAGAGATTTCGCTTGGAGAAG  
CY118918 TTTCGAGTCTCTAAAAAATCTACAGAGATTTCGCTTGGAGAAG  
CY113369 TTTCGAGTCTCTAAAAAATCTACAGAGATTTCGCTTGGGAAG  
CY112841 TTTCGAGTCTCTAAAACTCTACAGAGATTTCGCTTGGAGAAG  
CY006671 TTTCGAGTCTCTGAAACTCTACAGAGATTTCGCTTGGAGAAG  
CY032265 TTTCGAGTCTCTAAAACTCTACAGAGATTTCGCTTGGAGAAG  
CY080527 TTTCGAGTCTCTAAAACTCTACAGAGATTTCGCTTGGGAAG  
CY021041 TTTCGAGTCTCTAAAACTCTACAGAGATTTCGCTTGGAGAAG  
CY013275 TTTCGAGTCTCTAAAACTCTACAGAGATTTCGCTTGGAGAAG  
CY087804 TTTCGAGTCTCTAAAACTCTACAGAGATTTCGCTTGGAGAAG  
CY009344 TTTCGAGTCTCTAAAACTCTACAGAGATTTCGCTTGGAGAAG  
CY010376 TTTCGAGTCTCTAAAACTCTACAGAGATTTCGCTTGGAGAAG  
AF333238 TTTCGAGTCTCTGAAACTCTACAGAGATTTCGCTTGGAGAAG  
CY045776 TTTCGAGTCTCTGAAACTCTACAGAAAATTTCGCTTGGAGACG  
CY009608 TTTCGAGTCTCTGAAACTCTACAGAGATTTCGCTTGGAGAAG  
CY020449 TTTCGAGTCTCTGAAACTCTACAGAGATTTCGCTTGGAGAAG  
CY021961 TTTCGAGTCTCTGAAACTCTACAGAGATTTCGCTTGGAGAAG

641

JX046930 CTGTGATGAGAATGGGAGACCTTCACTACCTCCAGAGCAG  
CY049991 CTGTGATGAGAATGGGAGACCTTCACTACCTCCAGAGCAG  
GQ132138.1| CTGTGATGAGAATGGGAGACCTTCACTACCTCCAGAGCAG  
AJ278649 CAGTGATGAGAATGGGAGATCTCCACTCCCTCCAAAACAG  
CY118918 CAGTAATGAGAATGGGGGACCTCCACTTACTCCAAAACAG  
CY113369 CAGTAATGAGAATGGGGGACCTCCACTTACTCCAAAACAG  
CY112841 CAGTAATGAGAATGGGGGACCTCCACTTACTCCAAAACAG  
CY006671 CAGTAATGAGACTGGGGGACCTCCATTCACTACAAACAG  
CY032265 CAGTAATGAGAATGGGAGACCTCCACTCACTCCAAAACAG  
CY080527 CAGTAATGAGAATGGGAGACCTCCACTCACTCCAAAACAG  
CY021041 CAGTAATGAGAATGGGAGACCTCCACTCACTCCAAAACAG  
CY013275 CAGTAATGAGAATGGGGGACCTCCACTCACTCCAAAACAG  
CY087804 CAGTAATGAGAATGGGAGACCTCCACTCACTCCAAAACAG  
CY009344 CAGTAATGAGAATGGGAGACCTCCACTCACTCCAAAACAG  
CY010376 CAGTAATGAGAATGGGAGACCTCCACTCACTCCAAAACAG  
AF333238 CAGTAATGAGAATGGGAGACCTCCACTCCCTCCAAAACAG  
CY045776 CAGTAATGAGAATGGGAGACCTCCACTCACTCCAAAACAG  
CY009608 CAGTAATGAGAATGGGAGACCTCCACTCACTCCAAAACAG  
CY020449 CAGTAATGAGAATGGGAGACCTCCACTCACTCCAAAACAG  
CY021961 CAGTAATGAGAATGGGAGACCTCCACTCACTCCAAAACAG

681

JX046930 AAATGAAAAGTGGCGAGAGCAATTGGGACAGAAATTTGAG  
CY049991 AAATGAAAAGTGGCGAGAGCAATTGGGACAGAAATTTGAG  
GQ132138.1| AAATGAAAAGTGGCGAGAGCAATTGGGACAGAAATTTGAG  
AJ278649 AAACGGAAAAGTGGAGAGAACAAATTGAGCCAGAAGTTTGAA  
CY118918 AAACGGAAAAATGGCGAGAACAGCTAGGTCAAAAGTTTGAA  
CY113369 AAACGGAAAATGGCGAGAACAGCTAGGTCAAAAGTTTCGAA  
CY112841 AAACGGAAAATGGCGAGAACAGCTAGGTCAAAAGTTTGAA  
CY006671 AAACGGAAAATGGCGGAACAAATTAGGTCAGAAGTTTGAA  
CY032265 AAACGGAAAATGGCGAGAACAAATTAGGTCAAAAGTTTCGAA  
CY080527 AAACGGAAAATGGCGAGAACAGTTAGGTCAAAAGTTTCGAA  
CY021041 AAACGGAAAATGGCGGAACAAATTAGGTCAGAAGTTTCGAA  
CY013275 AAACGGAAAATGGCGAGAACAAATTAGGTCAGAAGTTTCGAA  
CY087804 AAACGGAAAATGGCGAGAACAAATTAGGTCAAAAGTTTCGAA  
CY009344 AAACGGAAAATGGCGAGAACAAATTAGGTCAGAAGTTTCGAA  
CY010376 AAACGGAAAATGGCGAGAACAAATTAGGTCAGAAGTTTCGAA  
AF333238 AAACGGAAAATGGCGAGAACAATTAAGTCAGAAGTTTGAA  
CY045776 AAACGGAAAATGGCGGAACAAATTAGGTCAGAAGTTTGAA  
CY009608 AAACGGAAAATGGCGGAACAAATTAGGTCAGAAGTTTGAA  
CY020449 AAACGGGAAAATGGCGGAACAAATTAGGTCAGAAGTTTGAA  
CY021961 AAACGAGAAAATGGCGGAACAAATTAGGTCAGAAGTTTGAA

721

JX046930 GAAATAAGGTTGGTTAATTGAAGAAAATGCGGCACAGATTGA  
CY049991 GAAATAAGGTTGGTTAATTGAAGAAAATGCGGCACAGATTGA  
GQ132138.1| GAAATAAGGTTGGTTAATTGAAGAAAATGCGGCACAGATTGA  
AJ278649 GAGATAAGATGGTTAATTGAAGAAAATGCGACATAGGTTAA  
CY118918 GAGATAAGATGGCTAATTGAAGAAGTGAGACACAGACTAA  
CY113369 GAGATAAGATGGCTGATTGAAGAAGTGAGACACAGACTAA  
CY112841 GAGATAAGATGGCTGATTGAAGAAGTGAGACACAGGCTAA  
CY006671 GAAATAAGATGGCTGATTGAAGAAGTGAGGCATAAATTGA  
CY032265 GAGATAAGATGGCTGATTGAAGAAGTGAGACACAGATTGA  
CY080527 GAGATAAGATGGCTGATTGAAGAAGTGAGACACAGATTGA  
CY021041 GAAATAAGATGGCTGATTGAAGAAGTGAGACATAAATTGA  
CY013275 GAAATAAGATGGTTGATTGAAGAAGTGAGACACAGATTGA  
CY087804 GAAATAAGATGGCTGATTGAAGAAGTGAGACACAAATTGA  
CY009344 GAAATAAGATGGCTGATTGAAGAAGTGAGACACAAATTGA  
CY010376 GAAATAAGATGGCTGATTGAAGAAGTGAGACACAGATTGA  
AF333238 GAAATAAGATGGTTGATTGAAGAAGTGAGACATAGACTGA  
CY045776 GAAATAAGATGGTTGATTGAAGAAGTGAGACACAGACTGA  
CY009608 GAAATAAGATGGTTGATTGAAGAAGTGAGACACAGACTGA  
CY020449 GAAATAAGATGGTTGATTGAAGAAGTGAGACACAAACTGA  
CY021961 GAAATAAGATGGTTGATTGAAGAAGTGAGACACAAACTGA

761

JX046930 AAGCGACAGAGAATAGTTTCGAACAAATAACATTTTATGCA  
CY049991 AAGCGACAGAGAATAGTTTCGAACAAATAACATTTTATGCA  
GQ132138.1| AAGCGACAGAGAATAGTTTCGAACAAATAACATTTTATGCA  
AJ278649 GAATTTACAGAGAATAGCTTTGAGCAAATAACCTTTTATGCA  
CY118918 AAACAACCTGAAAAATAGCTTTGAACAAATAACATTCATGCA  
CY113369 AAACAACCTGAGAATAGTTTTCGAGCAAATAACATTCATGCA  
CY112841 AAACAACCTGAGAATAGTTTTCGAGCAAATAACATTCATGCA  
CY006671 AGACGACAGAGAATAGTTTTCGAGCAAATAACATTTTATGCA  
CY032265 AGATAACAGAGAATAGCTTTCGAGCAAATAACATTTTATGCA  
CY080527 AGACAACAGAGAATAGTTTTCGAGCAAATAACATTTTATGCA  
CY021041 AGATAACAGAGAATAGTTTTCGAGCAAATAACATTTTATGCA  
CY013275 AAATAACAGAGAATAGTTTTCGAGCAAATAACATTTTATGCA  
CY087804 AGATAACAGAGAATAGTTTTCGAGCAAATAACATTTTATGCA  
CY009344 AGATAACAGAGAATAGTTTTCGAGCAAATAACATTTTATGCA  
CY010376 AGATAACAGAGAATAGTTTTCGAGCAAATAACATTTTATGCA  
AF333238 AGATAACAGAGAATAGTTTTCGAGCAAATAACATTTTATGCA  
CY045776 AGATAACAGAGAATAGTTTTCGAGCAAATAACATTTTATGCA  
CY009608 AGATAACAGAGAATAGTTTTCGAGCAAATAACATTTTATGCA  
CY020449 AGGTAAACAGAGAATAGTTTTCGAGCAAATAACATTTTATGCA  
CY021961 AGATAACAGAGAATAGTTTTCGAGCAAATAACATTTTATGCA

801

JX046930 AGCCTTACAACCTACTGCTTGAAGTAGAACAAGAGATAAGA  
CY049991 AGCCTTACAACCTACTGCTTGAAGTAGAACAAGAGATAAGA  
GQ132138.1| AGCCTTACAACCTACTGCTTGAAGTAGAACAAGAGATAAGA  
AJ278649 AGCCTTACAACCTATTGCTTGAAGTGGAGCAAGAGATAAGA  
CY118918 AGCATTACAACCTGCTGTTTGAAGTGGAAACAGGAGATAAGA  
CY113369 AGCCTTACAGCTGCTGTTTGAAGTGGAAACAGGAGATAAGA  
CY112841 AGCATTACAGCTGCTGTTTGAAGTGGAAACAGGAAATAAGA  
CY006671 AGCATTACAGCTATTATTGTTTGAAGTGGAAACAAGAGATTAGA  
CY032265 AGCCTTACAGCTACTATTGTTTGAAGTGGAAACAAGAGATAAGA  
CY080527 AGCCTTACAGCTACTATTGTTTGAAGTGGAAACAGGAGATAAGA  
CY021041 AGCCTTACAGCTATTGTTTGAAGTGGAAACAAGAGATAAGA  
CY013275 AGCCTTACAGCTATTGTTTGAAGTGGAGCAAGAGATAAGA  
CY087804 AGCCTTACAGCTACTATTGTTTGAAGTGGAAACAAGAGATAAGA  
CY009344 AGCCTTACAGCTATTGTTTGAAGTGGAAACAAGAGATAAGA  
CY010376 AGCCTTACAGCTATTGTTTGAAGTGGAAACAAGAGATAAGA  
AF333238 AGCCTTACAACCTATTGCTTGAAGTGGAGCAAGAGATAAGA  
CY045776 AGCCTTACAACCTATTGCTTGAAGTGGAGCAAGAGATAAGA  
CY009608 AGCCTTACAACCTATTGCTTGAAGTGGAGCAAGAGATAAGA  
CY020449 AGCCTTACATCTATTGCTTGAAGTGGAGCAAGAGATAAGA  
CY021961 AGCCTTACATCTATTGCTTGAAGTGGAGCAAGAGATAAGA

841

|            |                                           |       |
|------------|-------------------------------------------|-------|
| JX046930   | GCTTTCTCGTTTCAGCTTATTTAAATG               | ----- |
| CY049991   | GCTTTCTCGTTTCAGCTTATTTAAGGTCATAA          | ----- |
| GQ132138.1 | GCTTTCTCGTTTCAGCTTATTTAAATGATAA           | ----- |
| AJ278649   | ACTTTCTCGTTTCAGCTTATTTAAATGATAAAAAAACACCC | ---   |
| CY118918   | ACTTTCTCATTTTCAGCTTATTTAAATGATAAAAAAAC    | ----- |
| CY113369   | ACTTTCTCATTTTCAGCTTATTTAAATGATAAAAAAAC    | ----- |
| CY112841   | ACTTTCTCATTTTCAGCTTATTTAAATGATAAAAAAACACC | ---   |
| CY006671   | ACGTTTTCGTTTCAGCTTATTTAAATGATAAAAAAAC     | ----- |
| CY032265   | ACTTTCTCGTTTCAGCTTATTTAAATGATAAA          | ----- |
| CY080527   | ACTTTCTCGTTTCAGCTTATTTAAATGATAAAAAAACAC   | ---   |
| CY021041   | ACATTTTCGTTTCAGCTTATTTAA                  | ----- |
| CY013275   | ACTTTCTCGTTTCAGCTTATTTAA                  | ----- |
| CY087804   | ACTTTCTCGTTTCAGCTTATTTAAATGATAAAAAAACAC   | ---   |
| CY009344   | ACTTTCTCATTTTCAGCTTATTTAAATGATAAAAAAAC    | ----- |
| CY010376   | ACTTTCTCGTTTCAGCTTATTTAAATGATAAAAAAAC     | ----- |
| AF333238   | ACTTTCTCGTTTCAGCTTATTTAA                  | ----- |
| CY045776   | ACTTTCTCATTTTCAGCTTATTTAAATAAAAAAAC       | ----- |
| CY009608   | ACTTTCTCGTTTCAGCTTATTTAAATGATAAAAAAAC     | ----- |
| CY020449   | ACTTTCTCGTTTCAGCTTATTTAAATAAAAA           | ----- |
| CY021961   | ACTTTCTCGTTTCAGCTTATTTAGTAATAAAAAAAC      | ----- |

881

|            |            |
|------------|------------|
| JX046930   | -----      |
| CY049991   | -----      |
| GQ132138.1 | -----      |
| AJ278649   | TGTTTCTACT |
| CY118918   | -----      |
| CY113369   | -----      |
| CY112841   | -----      |
| CY006671   | -----      |
| CY032265   | -----      |
| CY080527   | -----      |
| CY021041   | -----      |
| CY013275   | -----      |
| CY087804   | -----      |
| CY009344   | -----      |
| CY010376   | -----      |
| AF333238   | -----      |
| CY045776   | -----      |
| CY009608   | -----      |
| CY020449   | -----      |
| CY021961   | -----      |
