# Supplementary material
Source: MDPI journal article supplement (https://www.mdpi.com/1099-4300/15/8/3065)
Supplement: s1 [file s1]

1  
AJ404630 GCGAAAAGCAGGTCGAATTATATTCGAATATGGAAAGAAATAA  
JX046923 -----ATGGAGAGAAATAA  
CY049984 -----ATGGAGAGAAATAA  
GQ132138.1| -----ATGGAGAGAAATAA  
CY006674 ----AAAGCAGGTCGAATTATATTCGAATATGGAAAGAAATAA  
DQ208309 -----ATGGAAAGAAATAA  
CY118921 -----ATTATATTCAGTATGGAAAGAAATAA  
CY113372 -----ATTATATTCAGTATGGAAAGAAATAA  
CY112844 -----ATTATATTCAGTATGGAAAGAAATAA  
CY020452 -----ATATGGAAAGAAATAA  
CY021964 -----AATATGGAAAGAAATAA  
CY009611 -----TCAATTATATTCGAATATGGAAAGAAATAA  
CY045779 -----ATGGAAAGAAATAA  
CY010379 -----TCAATTATATTCGAATATGGAAAGAAATAA  
CY021044 -----TCAATTATATTCGAATATGGAAAGAAATAA  
CY032268 -----ATATGGAAAGAAATAA  
CY080530 ----AAAGCAGGTCGAATTATATTCGAATATGGAAAGAAATAA  
CY087807 -----AATATGGAAAGAAATAA  
CY013278 -----TTCAATATGGAAAGAAATAA  
CY009347 -----TCAATTATATTCGAATATGGAAAGAAATAA

41  
AJ404630 AAGAAGCTAAGAAATTTGATGTCGCAGTCTCGCACTCGCGA  
JX046923 AAGAAGCTGAGAGATCTAATGTCGCAGTCCCGCACTCGCGA  
CY049984 AAGAAGCTGAGAGATCTAATGTCGCAGTCCCGCACTCGCGA  
GQ132138.1| AAGAAGCTGAGAGATCTAATGTCGCAGTCCCGCACTCGCGA  
CY006674 AAGAGCTGAGGAATCTGATGTCACAATCTCGCACTCGCGA  
DQ208309 AAGAAGCTAAGGATCTAATGTCGCAGTCTCGCACTCGCGA  
CY118921 AAGAAGCTACGGAATCTGATGTCGCAGTCTCGCACTCGCGA  
CY113372 AAGAAGCTACGGAACCTGATGTCGCAGTCTCGCACTCGCGA  
CY112844 AAGAAGCTACGGAACCTGATGTCGCAGTCTCGCACTCGCGA  
CY020452 AAGAAGCTAAGGAATCTAATGTCGCAGTCTCGCACTCGCGA  
CY021964 AAGAAGCTAAGAAATCTAATGTCGCAGTCTCGCACTCGCGA  
CY009611 AAGAAGCTAAGGAATCTAATGTCGCAGTCTCGCACTCGCGA  
CY045779 AAGAAGCTAAGGAATCTAATGTCGCAGTCTCGCACTCGCGA  
CY010379 AAGAGCTAAGGAATCTGATGTCGCAGTCTCGCACTCGCGA  
CY021044 AAGAGCTAAGGAATCTGATGTCGCAGTCCCGCACTCGCGA  
CY032268 AAGAAGCTACGGAATCTGATGTCGCAGTCTCGCACTCGCGA  
CY080530 AAGAAGCTACGGAATCTGATGTCGCAGTCTCGCACTCGCGA  
CY087807 AAGAAGCTACGGAATCTGATGTCGCAGTCTCGCACTCGCGA  
CY013278 AAGAAGCTAAGGAATCTGATGTCGCAGTCTCGCACTCGCGA  
CY009347 AAGAAGCTAAGGAATCTGATGTCGCAGTCTCGCACTCGCGA

81  
AJ404630 GATACTGACAAAAACCACTGTGGATCATAATGGCCATAAATT  
JX046923 GATACTCACTAAGACCACTGTGGACCATAATGGCCATAAATC  
CY049984 GATACTCACTAAGACCACTGTGGACCATAATGGCCATAAATC  
GQ132138.1| GATACTCACTAAGACCACTGTGGACCATAATGGCCATAAATC  
CY006674 GATACTTACCAAAAATCTAGTGTAGACCACATGGCCATAAATC  
DQ208309 GATACTCACAAAAACCACTGTGGACCATAATGGCCATAAATC  
CY118921 GATACTGACAAAAACCACTGTGGACCATAATGGCCATAAATT  
CY113372 GATACTAACAAAAACCACTGTGGACCATAATGGCCATAAATT  
CY112844 GATACTAACAAAAACCACTGTGGACCATAATGGCCATAAATT  
CY020452 GATACTCACAAAAACCACTGTGGACCATAATGGCCATAAATC  
CY021964 GATACTCACAAAAACCACTGTGGACCATAATGGCCATAAATC  
CY009611 GATACTCACAAAAACCACTGTGGACCATAATGGCCATAAATC  
CY045779 GATACTCACAAAAACCACTGTGGACCATAATGGCCATAAATC  
CY010379 GATACTCACAAAAACCACTGTAGACCACATGGCCATAAATC  
CY021044 GATACTTACAAAAACCACTGTAGACCACATGGCCATAAATC  
CY032268 GATACTAACAAAAACCACTGTGGACCATAATGGCCATAAATT  
CY080530 GATACTAACAAAAACCACTGTGACCATAATGGCCATAAATT  
CY087807 GATACTAACAAAAACCACTGTGGACCATAATGGCCATAAATT  
CY013278 GATACTCACAAAAACCACTGTGGACCATAATGGCCATAAATT  
CY009347 GATACTAACAAAAACCACTGTGGACCATAATGGCCATAAATT

121

AJ404630 AAGAAGTACACATCAGGAAGACAGGAGAAAGAAATCCCGGCTC  
 JX046923 AAAAAGTACACATCAGGAAGGCAAGAGAAAGAAATCCCGGCAC  
 CY049984 AAAAAGTACACATCAGCAAGACAAAGAGAAAGAAATCCCGGCAC  
 GQ132138.1| AAAAAGTACACATCAGGAAGGCAAGAGAAAGAAATCCCGGCAC  
 CY006674 AAGAAATACACATCAGGAAGACAGGAGAAAAAATCCCATCAC  
 DQ208309 AAGAAGTACACATCAGGAAGACAGGAGAAAGAAATCCCGGCAC  
 CY118921 AAGAAGTACACATCGGGGAGACAGGAAAAAGAAATCCCGTCAC  
 CY113372 AAGAAGTACACATCAGGGAGACAGGAAAAAGAAATCCCGTCAC  
 CY112844 AAGAAGTACACATCAGGGAGACAGGAAAAAGAAATCCCGTCAC  
 CY020452 AAGAAGTACACATCAGGAAGACAGGAGAAAGAAATCCCATCAC  
 CY021964 AAGAAGTACACATCAGGAAGACAGGAGAAAGAAATCCCATCAC  
 CY009611 AAGAAGTACACATCAGGAAGACAGGAGAAAGAAATCCCATCAC  
 CY045779 AAGAAGTACACATCAGGAAGACAGGAGAAAGAAATCCCATCAC  
 CY010379 AAGAAATACACATCAGGAAGACAGGAGAAAAAATCCCGTCAC  
 CY021044 AAGAAATACACATCAGGAAGACAGGAGAAAAAATCCCGTCAC  
 CY032268 AAGAAGTACACATCAGGGAGACAGGAAAAAGAAATCCCGTCAC  
 CY080530 AAGAAGTATACATCAGGGAGACAGGAAAAAGAAATCCCGTCAC  
 CY087807 AAGAAGTACACATCAGGGAGACAGGAAAAAGAAATCCCGTCAC  
 CY013278 AAGAAGTACACATCAGGAAGACAGGAGAAAGAAATCCCGTCAC  
 CY009347 AAGAAGTACACATCAGGGAGACAGGAGAAAGAAATCCCGTCAC

161

AJ404630 TTAGAATGAAATGGATGATGGCGATGAAATACCCGATCAC  
 JX046923 TCAGAATGAAGTGGATGATGGCAATGAGATACCCAATTAC  
 CY049984 TCAGAATGAAGTGGATGATGGCAATGAGATACCCAATTAC  
 GQ132138.1| TCAGAATGAAGTGGATGATGGCAATGAGATACCCAATTAC  
 CY006674 TTAGGATGAAATGGATGATGGCAATGAAATACCCAATTAC  
 DQ208309 TTAGGATGAAATGGATGATGGCAATGAAATATCCAATTAC  
 CY118921 TTAGGATGAAATGGATGATGGCAATGAAATACCCAATCAC  
 CY113372 TTAGGATGAAATGGATGATGGCAATGAAATATCCAATCAC  
 CY112844 TTAGGATGAAATGGATGATGGCAATGAAATATCCAATCAC  
 CY020452 TTAGGATGAAATGGATGATGGCAATGAAATATCCAATTAC  
 CY021964 TTAGGATGAAATGGATGATGGCAATGAAATATCCAATTAC  
 CY009611 TTAGGATGAAATGGATGATGGCAATGAAATATCCAATTAC  
 CY045779 TTAGGATGAAATGGATGATGGCAATGAAATATCCAATTAC  
 CY010379 TTAGGATGAAATGGATGATGGCGATGAAATATCCAATTAC  
 CY021044 TTAGGATGAAATGGATGATGGCGATGAAATATCCAATTAC  
 CY032268 TTAGGATGAAATGGATGATGGCAATGAAATATCCAATTAC  
 CY080530 TTAGGATGAAATGGATGATGGCAATGAAATATCCAATTAC  
 CY087807 TTAGGATGAAATGGATGATGGCAATGAAATATCCGATTAC  
 CY013278 TTAGGATGAAATGGATGATGGCAATGAAATATCCGATTAC  
 CY009347 TTAGGATGAAATGGATGATGGCAATGAAATATCCAATTAC

201

AJ404630 AGCTGACAAAAAGAAATAATGGAGATGATCCCTGAAAGGAAT  
 JX046923 AGCAGACAAAGAGAATAATGGACATGATTCCAGAGAGGAAT  
 CY049984 AGCAGACAAAGAGAATAATGGACATGATTCCAGAGAGGAAT  
 GQ132138.1| AGCAGACAAAGAGAATAATGGACATGATTCCAGAGAGGAAT  
 CY006674 AGCTGATAAAAAGGATAACGGAAATGATTCCCTGAAAGGAAT  
 DQ208309 AGCAGACAAAGAGGATAATGGAAATGATTCCCTGAGAGAAAT  
 CY118921 TGCTGACAAAAAGGATAACAGAAATGGTTCCGGAGAGAAAT  
 CY113372 TGCTGACAAAAAGGATAACAGAAATGGTTCCGGAGAGAAAT  
 CY112844 TGCTGACAAAAAGGATAACAGAAATGGTTCCGGAGAGAAAT  
 CY020452 AGCAGACAAAGAGGATAACGGAAATGATTCCCTGAGAGAAAT  
 CY021964 AGCAGACAAAGAGGATAACGGAAATGATTCCCTGAGAGAAAT  
 CY009611 AGCAGACAAAGAGGATAACGGAAATGATTCCCTGAGAGAAAT  
 CY045779 AGCAGACAAAGAGGATAACGGAAATGATTCCCTGAGAGAAAT  
 CY010379 AGCAGACAAAAGGATAACGGAAATGATTCCCTGAGAGAAAT  
 CY021044 AGCAGACAAAAGGATAACGGAAATGATTCCCTGAGAGAAAT  
 CY032268 AGCTGACAAAGAGGATAACAGAAATGGTTCCCTGAGAGAAAT  
 CY080530 AGCTGACAAAGAGGATAACAGAAATGGTTCCCTGAGAGAAAT  
 CY087807 AGCTGACAAAGAGGATAACAGAAATGATTCCCTGAGAGAAAT  
 CY013278 AGCAGACAAAGAGGATAACGGAAATGATTCCCTGAGAGAAAT  
 CY009347 AGCAGACAAAGAGGATAACAGAAATGATTCCCTGAGAGAAAT

241

AJ404630 GAGCAAGGCGAAACTCTTTGGAGCAAAACAAATGACGCTG  
JX046923 GAACAAGGACAAACCCCTCTGGAGCAAAACAAACGATGCTG  
CY049984 GAACAAGGACAAACCCCTCTGGAGCAAAATAAACGATGCTG  
GQ132138.1| GAACAAGGACAAACCCCTCTGGAGCAAAACAAACGATGCTG  
CY006674 GAGCAAGGACAGACACTATGGAGTAAAGTGAATGATGCCG  
DQ208309 GAGCAAGGACAAACTCTATGGAGTAAAAAGAACGATGCCG  
CY118921 GAACAAGGACAAACTCTATGGAGTAAAAATGAGTGATGCTG  
CY113372 GAACAAGGACAGACTCTATGGAGTAAAAATGAGTGATGCTG  
CY112844 GAACAAGGACAAACTCTATGGAGTAAAAATGAGTGATGCTG  
CY020452 GAGCAAGGACAAACTTTATGGAGTAAAAATGAATGATGCCG  
CY021964 GAGCAAGGACAAACTTTATGGAGTAAAAATGAATGATGCCG  
CY009611 GAGCAAGGACAAACTTTATGGAGTAAAAATGAATGATGCCG  
CY045779 GAGCAAGGACAAACTTTATGGAGTAAAAATGAATGATGCCG  
CY010379 GAGCAAGGGCAAAACATTATGGAGTAAAAATGAATGATGCCG  
CY021044 GAGCAAGGGCAAAACATTATGGAGTAAAAATGAATGATGCCG  
CY032268 GAGCAAGGACAAACTCTATGGAGTAAAAATGAGTGATGCCG  
CY080530 GAGCAAGGACAAACTCTATGGAGCAAAATGAGTGATGCCG  
CY087807 GAGCAAGGGCAAAACTCTATGGAGTAAAAATGAGTGATGCCG  
CY013278 GAGCAAGGGCAAAACTCTGTTGGAGTAAAAATGAATGATGCCG  
CY009347 GAGCAAGGGCAAACTTTGTTGGAGTAAAAATAAATGATGCTG

281

AJ404630 GATCAGACAGGGTAAATGGTATCACCTCTGGCTGTAAACGTG  
JX046923 GATCAGACCGAGTGATGGTATCACCTCTGGCCGTAAACATG  
CY049984 GATCAGACCGAGTGATGGTATCACCTCTGGCCGTAAACATG  
GQ132138.1| GATCAGACCGAGTGATGGTATCACCTCTAGCCGTAAACATG  
CY006674 GATCAGACCGAGTGATGATATCACCCCTGGCTGTGACATG  
DQ208309 GATCAGACCGAGTGATGGTATCACCTCTGGCTGTGACATG  
CY118921 GATCAGATCGAGTGATGGTATCACCTTTGGCTGTAAACATG  
CY113372 GGTTCAGATCGAGTGATGGTATCACCTTTGGCAGTGACATG  
CY112844 GGTTCAGATCGAGTGATGGTATCACCTTTGGCTGTGACATG  
CY020452 GATCAGACCGAGTGATGGTATCACCTCTGGCTGTGACATG  
CY021964 GATCAGACCGAGTGATGGTATCACCTCTGGCTGTGACATG  
CY009611 GATCAGACCGAGTGATGGTATCACCTCTGGCTGTGACATG  
CY045779 GATCAGACCGAGTGATGGTATCACCTCTGGCTGTAAACATG  
CY010379 GATCAGACCGAGTGATGGTATCACCCCTGGCTGTGACATG  
CY021044 GATCAGACCGAGTGATGATATCACCCCTGGCTGTGACATG  
CY032268 GGTTCAGATCGAGTGATGGTATCACCTTTGGCAGTGACATG  
CY080530 GATCAGATCGAGTGATGGTATCACCCCTGGCAGTGACATG  
CY087807 GATCGGATCGTGTGATGGTATCACCTCTGGCTGTGACATG  
CY013278 GATCAGACCGAGTGATGGTATCACCTCTGGCTGTGACATG  
CY009347 GATCGGATCGAGTGATGGTATCACCTCTGGCTGTGACATG

321

AJ404630 GTGGAACAGAAATGGACCAACAACAAGTACAGTCCATTAT  
JX046923 GTGGAATAGGAATGGCCCAACAACAAGTACAGTTCATTAC  
CY049984 GTGGAATAGGAATGGCCCAACAACAAGTGCATTTCAATTAC  
GQ132138.1| GTGGAATAGGAATGGCCCAACAACAAGTACAGTTCATTAC  
CY006674 GTGGAACAGAAATGGACCAATGGCAAAATACTATTCACTAT  
DQ208309 GTGGAATAGGAATGGACCAACGACAAGTGCAGTTCACTAT  
CY118921 GTGGAATAGAAATGGACCTGTGACAAAGTACGGTCCATTAC  
CY113372 GTGGAATAGAAATGGACCAATGACAAATACGGTTCACTAT  
CY112844 GTGGAATAGAAATGGACCCGTGACAAATACGGTTCACTAT  
CY020452 GTGGAATAGGAATGGACCAATGACAAATACAGTTCATTAT  
CY021964 GTGGAATAGGAATGGACCAATACAAATACAGTTCATTAT  
CY009611 GTGGAATAGAAATGGACCAATGACAAGTACAGTTCATTAT  
CY045779 GTGGAATAGGAATGGACCAATGACAAGTACAGTTCATTAT  
CY010379 GTGGAATAGAAATGGACCAATGACAAGTACTGTTCAATTAT  
CY021044 GTGGAATAGAAATGGACCAATGGCAAGTACTGTTCACTAT  
CY032268 GTGGAATAGAAATGGACCAATGACAAGTACGGTTCATTAT  
CY080530 GTGGAATAGAAATGGACCAATGACAAGTACGGTTCATTAT  
CY087807 GTGGAATAGAAATGGACCAATGACAAGTACGGTTCATTAT  
CY013278 GTGGAATAGAAATGGACCAATGACAAGTACGGTTCATTAT  
CY009347 GTGGAATAGAAATGGACCAATGACAAGTACGGTTCATTAT

361

AJ404630 CCTAAGGTTATATAAAACCTTATTTGAAAAAGTTCGAAAAGGT  
 JX046923 CCTAAGGTTATATAAAACCTTATTTGAAAAAGTTCGAAAAGGT  
 CY049984 CCTAAGGTTATATAAAACCTTATTTGAAAAAGTTCGAAAAGGT  
 GQ132138.1| CCTAAGGTTATATAAAACCTTATTTGAAAAAGTTCGAAAAGGT  
 CY006674 CCAAAAAATCTACAAAACCTTATTTGAAAAAGTTCGAAAAGGT  
 DQ208309 CCAAAAAATCTACAAAACCTTATTTGAAAAAGTTCGAAAAGGT  
 CY118921 CCAAAAAATCTACAAAACCTTATTTGAAAAAGTTCGAAAAGGT  
 CY113372 CCAAAAAATCTACAAAACCTTATTTGAAAAAGTTCGAAAAGGT  
 CY112844 CCAAAAAATCTACAAAACCTTATTTGAAAAAGTTCGAAAAGGT  
 CY020452 CCAAAAAATCTACAAAACCTTATTTGAAAAAGTTCGAAAAGGT  
 CY021964 CCAAAAAATCTACAAAACCTTATTTGAAAAAGTTCGAAAAGGT  
 CY009611 CCAAAAAATCTACAAAACCTTATTTGAAAAAGTTCGAAAAGGT  
 CY045779 CCAAAAAATCTACAAAACCTTATTTGAAAAAGTTCGAAAAGGT  
 CY010379 CCAAAAAATCTACAAAACCTTATTTGAAAAAGTTCGAAAAGGT  
 CY021044 CCAAAAAATCTACAAAACCTTATTTGAAAAAGTTCGAAAAGGT  
 CY032268 CCAAAAAATCTACAAAACCTTATTTGAAAAAGTTCGAAAAGGT  
 CY080530 CCAAAAAATCTACAAAACCTTATTTGAAAAAGTTCGAAAAGGT  
 CY087807 CCAAAAAATCTACAAAACCTTATTTGAAAAAGTTCGAAAAGGT  
 CY013278 CCAAAAAATCTACAAAACCTTATTTGAAAAAGTTCGAAAAGGT  
 CY009347 CCAAAAAATCTACAAAACCTTATTTGAAAAAGTTCGAAAAGGT

401

AJ404630 TAAAAACATGGAACCTTTGGCCCTGTCCATTTTCCGGAATCA  
 JX046923 TAAAAACATGGAACCTTTGGCCCTGTCCATTTTCCGGAATCA  
 CY049984 TAAAAACATGGAACCTTTGGCCCTGTCCATTTTCCGGAATCA  
 GQ132138.1| TAAAAACATGGAACCTTTGGCCCTGTCCATTTTCCGGAATCA  
 CY006674 TAAAAACATGGAACCTTTGGCCCTGTCCATTTTCCGGAATCA  
 DQ208309 TAAAAACATGGAACCTTTGGCCCTGTCCATTTTCCGGAATCA  
 CY118921 TAAAAACATGGAACCTTTGGCCCTGTCCATTTTCCGGAATCA  
 CY113372 TAAAAACATGGAACCTTTGGCCCTGTCCATTTTCCGGAATCA  
 CY112844 TAAAAACATGGAACCTTTGGCCCTGTCCATTTTCCGGAATCA  
 CY020452 TAAAAACATGGAACCTTTGGCCCTGTCCATTTTCCGGAATCA  
 CY021964 TAAAAACATGGAACCTTTGGCCCTGTCCATTTTCCGGAATCA  
 CY009611 TAAAAACATGGAACCTTTGGCCCTGTCCATTTTCCGGAATCA  
 CY045779 TAAAAACATGGAACCTTTGGCCCTGTCCATTTTCCGGAATCA  
 CY010379 TAAAAACATGGAACCTTTGGCCCTGTCCATTTTCCGGAATCA  
 CY021044 TAAAAACATGGAACCTTTGGCCCTGTCCATTTTCCGGAATCA  
 CY032268 TAAAAACATGGAACCTTTGGCCCTGTCCATTTTCCGGAATCA  
 CY080530 TAAAAACATGGAACCTTTGGCCCTGTCCATTTTCCGGAATCA  
 CY087807 TAAAAACATGGAACCTTTGGCCCTGTCCATTTTCCGGAATCA  
 CY013278 TAAAAACATGGAACCTTTGGCCCTGTCCATTTTCCGGAATCA  
 CY009347 TAAAAACATGGAACCTTTGGCCCTGTCCATTTTCCGGAATCA

441

AJ404630 AGTCAAAATACGCCGAGAGTTGACATAAACCCCTGGTCAT  
 JX046923 AGTCAAAATACGCCGAGAGTTGACATAAACCCCTGGTCAT  
 CY049984 AGTCAAAATACGCCGAGAGTTGACATAAACCCCTGGTCAT  
 GQ132138.1| AGTCAAAATACGCCGAGAGTTGACATAAACCCCTGGTCAT  
 CY006674 AGTCAAAATACGCCGAGAGTTGACATAAACCCCTGGTCAT  
 DQ208309 AGTCAAAATACGCCGAGAGTTGACATAAACCCCTGGTCAT  
 CY118921 AGTCAAAATACGCCGAGAGTTGACATAAACCCCTGGTCAT  
 CY113372 AGTCAAAATACGCCGAGAGTTGACATAAACCCCTGGTCAT  
 CY112844 AGTCAAAATACGCCGAGAGTTGACATAAACCCCTGGTCAT  
 CY020452 AGTCAAAATACGCCGAGAGTTGACATAAACCCCTGGTCAT  
 CY021964 AGTCAAAATACGCCGAGAGTTGACATAAACCCCTGGTCAT  
 CY009611 AGTCAAAATACGCCGAGAGTTGACATAAACCCCTGGTCAT  
 CY045779 AGTCAAAATACGCCGAGAGTTGACATAAACCCCTGGTCAT  
 CY010379 AGTCAAAATACGCCGAGAGTTGACATAAACCCCTGGTCAT  
 CY021044 AGTCAAAATACGCCGAGAGTTGACATAAACCCCTGGTCAT  
 CY032268 AGTCAAAATACGCCGAGAGTTGACATAAACCCCTGGTCAT  
 CY080530 AGTCAAAATACGCCGAGAGTTGACATAAACCCCTGGTCAT  
 CY087807 AGTCAAAATACGCCGAGAGTTGACATAAACCCCTGGTCAT  
 CY013278 AGTCAAAATACGCCGAGAGTTGACATAAACCCCTGGTCAT  
 CY009347 AGTCAAAATACGCCGAGAGTTGACATAAACCCCTGGTCAT

481

AJ404630 GCAGATCTCAGTGCCTAAAGAGGCACAAGATGTCATCATGG  
 JX046923 GCAGATCTCAGTGCCAAGGAGGCACAGGATGTGATTATGG  
 CY049984 GCAGATCTCAGTGCCAAGGAGGCACAGGATGTGATTATGG  
 GQ132138.1| GCAGATCTCAGTGCCAAGGAGGCACAGGATGTGATTATGG  
 CY006674 GCAGACCTCAGTGCCTAAGGAGGCACAGGATGTAATTATGG  
 DQ208309 GCAGATCTCAGTGCCAAAAGAGGCACAGGATGTAATCATGG  
 CY118921 GCAGACCTCAGTGCCAAAAGAGGCACAAGATGTAATTATGG  
 CY113372 GCAGACCTCAGTGCCAAGGAGGCACAAGATGTAATTATGG  
 CY112844 GCAGACCTCAGTGCCAAGGAGGCACAAGATGTAATTATGG  
 CY020452 GCAGATCTCAGTGCCAAGGAGGCACAGGATGTAATCATGG  
 CY021964 GCAGATCTCAGTGCCAAGGAGGCACAGGATGTAATCATGG  
 CY009611 GCAGATCTCAGTGCCAAAAGAGGCACAGGATGTAATCATGG  
 CY045779 GCAGATCTCAGTGCCAAAAGAGGCACAGGATGTGATCATGG  
 CY010379 GCAGACCTCAGTGCCAAGGAGGCACAGGATGTAATTATGG  
 CY021044 GCAGACCTCAGTGCCAAGGAGGCACAGGATGTAATTATGG  
 CY032268 GCAGACCTCAGTGCCAAGGAGGCACAAGATGTAATCATGG  
 CY080530 GCAGACCTCAGTGCCAAGGAGGCACAAGATGTAATCATGG  
 CY087807 GCAGACCTCAGTGCCAAGGAGGCACAGGATGTAATCATGG  
 CY013278 GCAGACCTCAGTGCCAAGGAGGCACAGGATGTAATCATGG  
 CY009347 GCAGACCTCAGTGCCAAGGAGGCACAGGATGTAATTATGG

521

AJ404630 AAGTTCGTTTTCCTTCCCAAAATGAAGTTGGAGCCAGGATATTGAC  
 JX046923 AAGTTGTTTTCCTTCCCAAAATGAAGTTGGGGGCAAGAATACTGAC  
 CY049984 AAGTTGTTTTCCTTCCCAAAATGAAGTTGGGGGCAAGAATACTGAC  
 GQ132138.1| AAGTTGTTTTCCTTCCCAAAATGAAGTTGGGGGCAAGAATACTGAC  
 CY006674 AAGTTGTTTTCCTTCCCAAAATGAAGTTGGGAGCCAGAATACTAAC  
 DQ208309 AAGTTGTTTTCCTTCCCAAAATGAAGTTGGGAGCCAGGATACTAAC  
 CY118921 AAGTTGTTTTCCTTCCCAAAATGAAGTTGGGAGCCAGGATACTAAC  
 CY113372 AAGTTGTTTTCCTTCCCAAAATGAAGTTGGGAGCCAGGATACTAAC  
 CY112844 AAGTTGTTTTCCTTCCCAAAATGAAGTTGGGAGCCAGGATACTAAC  
 CY020452 AAGTTGTTTTCCTTCCCAAAATGAAGTTGGGAGCCAGGATACTAAC  
 CY021964 AAGTTGTTTTCCTTCCCAAAATGAAGTTGGGAGCCAGGATACTAAC  
 CY009611 AAGTTGTTTTCCTTCCCAAAATGAAGTTGGGAGCCAGGATACTAAC  
 CY045779 AAGTTGTTTTCCTTCCCAAAATGAAGTTGGGAGCCAGGATACTAAC  
 CY010379 AAGTTGTTTTCCTTCCCAAAATGAAGTTGGGAGCCAGGATACTAAC  
 CY021044 AAGTTGTTTTCCTTCCCAAAATGAAGTTGGGAGCCAGGATACTAAC  
 CY032268 AAGTTGTTTTCCTTCCCAAAATGAAGTTGGGGGCCAGGATACTAAC  
 CY080530 AAGTTGTTTTCCTTCCCAAAATGAAGTTGGGGGCCAGGATACTAAC  
 CY087807 AAGTTGTTTTCCTTCCCAAAATGAAGTTGGGGGCCAGGATACTAAC  
 CY013278 AAGTTGTTTTCCTTCCCAAAATGAAGTTGGGAGCCAGGATACTAAC  
 CY009347 AAGTTGTTTTCCTTCCCAAAATGAAGTTGGGAGCCAGGATACTAAC

561

AJ404630 ATCAGAATCACAGCTGACAAATAACAAAAGGAAAAAGAGGGAG  
 JX046923 ATCAGAGTCACAGCTGGCAATAACAAAAGAGAAGAAAAGAA  
 CY049984 ATCAGAGTCACAGCTGGCAATAACAAAAGAGAAGAAAAGAA  
 GQ132138.1| ATCAGAGTCACAGCTGGCAATAACAAAAGAGAAGAAAAGAA  
 CY006674 ATCAGAATCGCAATTAAACGATAAACCAGGAGAAAAAGAA  
 DQ208309 ATCGGAATCGCAACTGACAAATAACCAAGGAGAAAAAGAA  
 CY118921 ATCAGAATCGCAATTAAACAAATAACTAAGGAGAAAAAGAA  
 CY113372 ATCAGAATCACAAATTAAACAAATAACCAAGGAGAAAAAGAA  
 CY112844 ATCAGAATCACAAATTAAACAAATAACCAAGGAGAAAAAGAA  
 CY020452 ATCGGAATCGCAACTAACGATAAACCAGGAGAGAAGAAAAGAA  
 CY021964 ATCGGAATCGCAACTAACGATAAACCAGGAGAGAAGAAAAGAA  
 CY009611 ATCGGAATCGCAACTAACGATAAACCAGGAGAGAAGAAAAGAA  
 CY045779 ATCAGAATCGCAACTAACGATAAACCAGGAGAGAAGAAAAGAA  
 CY010379 ATCGGAATCGCAATTAAACGATAAACCAGGAGAGAAGAAAAGAA  
 CY021044 ATCAGAATCGCAATTAAACGATAAACCAGGAGAGAAGAAAAGAA  
 CY032268 GTCGGAATCACAAATTAAACAAATAACCAAGGAGAAAAAGAA  
 CY080530 GTCGGAATCACAAATTAAACAAATAACCAAGGAGAAAAAGAA  
 CY087807 GTCGGAATCGCAATTAAACAAATAACCAAGGAGAAAAAGAA  
 CY013278 GTCGGAATCGCAATTAAACGATAAACCAGGAGAAAAAGAA  
 CY009347 GTCGGAATCGCAATTAAATGGTAACCAAGGAGAGAAGAAAAGAA

601

AJ404630 GAACTCAAGAAATTGTAATAATTGOTCCCTTAAAGGTTGGCAT  
 JX046923 GAGCTCCAGGATTGTAAAAATTGCTCCCTTGATGGTGGCGT  
 CY049984 GAGCTCCAGGATTGTAAAAATTGCTCCCTTGATGGTGGCGT  
 GQ132138.1| GAGCTCCAGGATTGTAAAAATTGCTCCCTTGATGGTGGCGT  
 CY006674 GAACTCCAGAATTGCAAAAATTTCCCTTTGATGGTTGCAT  
 DQ208309 GAACTCCAGATTGTAAAAATTTCTCCTTTAAAGGTTGGCAT  
 CY118921 GAACTCCGAGATTGCAAAAATTTCTCCCTTGATGGTTGCAT  
 CY113372 GAACTCCGAGATTGCAAAAATTTCTCCTTTGATGGTTGCAT  
 CY112844 GAACTCCGAGATTGCAAAAATTTCTCCTTTGATGGTTGCAT  
 CY020452 GAACTCCAGGATTGCAAAAATTTCTCCTTTGATGGTTGCAT  
 CY021964 GAACTCCAGGATTGCAAAAATTTCTCCTTTGATGGTTGCAT  
 CY009611 GAACTCCAGGGTTGCAAAAATTTCTCCTTTGATGGTTGGCAT  
 CY045779 GAACTCCAGGATTGCAAAAATTTCCCTTTGATGGTGGCAT  
 CY010379 GAACTCCAGAATTGCAAAAATTTCTCCTTTGATGGTTGCAT  
 CY021044 GAACTCCAGAATTGCAAAAATTTCCCTTTGATGGTTGCAT  
 CY032268 GAACTCCAAGATTGCAAAAATTTCTCCTTTGATGGTTGCAT  
 CY080530 GAACTCCAAGATTGCAAAAATTTCTCCTTTGATGGTTGCAT  
 CY087807 GAACTCCAGGATTGCAAAAATTTCTCCTTTGATGGTTGCAT  
 CY013278 GAACTCCAGGATTGCAAAAATTTCTCCTTTGATGGTTGCAT  
 CY009347 GAACTCCAGGATTGCAAAAATTTCTCCTTTGATGGTTGCAT

641

AJ404630 ATATGTTGGAAAGAGAATTGGTTGCAAGACCAGATTCCCT  
 JX046923 ACATGCTAGAAAAGAGAATTGGTCCGTAAAAACAAGTTTCT  
 CY049984 ACATGCTAGAAAAGAGAATTGGTCCGTAAAAACAAGTTTCT  
 GQ132138.1| ACATGCTAGAAAAGAGAATTGGTCCGTAAAAACAAGTTTCT  
 CY006674 ACATGTTAGAGAGGGGAACTTGTCCGCAAAAACAAGATTCT  
 DQ208309 ACATGTTGGAGAGAGAAGCTGGTCCGAAAAACAAGATTCCCT  
 CY118921 ACATGTTAGAGAGAGAAGCTTGTACGAAAAACAAGATTCT  
 CY113372 ACATGTTAGAGAGAGAAGCTTGTCCGAAAAACAAGATTCT  
 CY112844 ACATGTTAGAGAGAGAAGCTTGTCCGAAAAACAAGATTCT  
 CY020452 ACATGTTGGAGAGAGAAGCTGGTCCGCAAAAACAAGATTCCCT  
 CY021964 ACATGTTGGAGAGAGAAGCTGGTCCGCAAAAACAAGATTCCCT  
 CY009611 ACATGTTGGAGAGAGAAGCTGGTCCGCAAAAACAAGATTCCCT  
 CY045779 ACATGTTGGAGAGAGAAGCTGGTCCGCAAAAACAAGATTCCCT  
 CY010379 ACATGTTAGAGAGAGAAGCTTGTCCGCAAAAACAAGATTCT  
 CY021044 ACATGTTAGAGAGAGAAGCTTGTCCGCAAAAACAAGATTCT  
 CY032268 ACATGTTAGAGAGAGAAGCTTGTCCGAAAAACAAGATTCT  
 CY080530 ACATGTTAGAGAGAGAAGCTTGTCCGAAAAACAAGATTCT  
 CY087807 ACATGTTAGAGAGAGAAGCTTGTCCGAAAAACAAGATTCT  
 CY013278 ACATGTTAGAGAGAGAAGCTTGTCCGCAAAAACAAGATTCT  
 CY009347 ACATGTTAGAGAGAGAAGCTTGTCCGCAAAAACAAGATTCT

681

AJ404630 ACCCGTGGCTGGCGGGACAAGCAGCGTATATATAGAAGTA  
 JX046923 CCCAGTAGCTGGTGGAACAGGCAGTGTATTATATTGAAGTG  
 CY049984 CCCGGTAGCCGGCGGAACAGGCAGTGTATTATATTGAAGTG  
 GQ132138.1| CCCAGTAGCCGGCGGAACAGGCAGTGTATTATATTGAAGTG  
 CY006674 CCCGGTTGCAGCTGGAACAAGCAGTGTGTACATTGAAGTT  
 DQ208309 CCCAGTGGCTGGTGGGACAAGCAGTGTGTATATTGAAGTG  
 CY118921 CCCAGTTGCTGGCGGAACAAGCAGTATATACATTGAAGTT  
 CY113372 CCCAGTTGCTGGTGGAACAGCAGTATATACATTGAAGTT  
 CY112844 CCCAGTTGCTGGCGGAACAAGCAGTATATACATTGAAGTT  
 CY020452 CCCAGTGGCTGGTGGAACAGCAGTGTGTACATTGAAGTG  
 CY021964 CCCAGTGGCTGGTGGAACAGCAGTGTGTACATTGAAGTG  
 CY009611 CCCAGTGGCTGGTGGAACAGCAGTGTGTACATTGAAGTG  
 CY045779 CCCAGTGGCTGGTGGAACAGCAGTGTGTACATTGAAGTG  
 CY010379 CCCAGTTGCTGGTGGAACAGCAGTGTGTACATTGAAGTT  
 CY021044 CCCAGTTGCTGGTGGAACAGCAGTGTGTACATTGAAGTT  
 CY032268 CCCAGTTGCTGGTGGAACAGCAGTGTGTACATTGAAGTG  
 CY080530 CCCAGTTGCTGGTGGAACAGCAGTGTATACATTGAAGTG  
 CY087807 CCCAGTTGCTGGTGGAACAGCAGTGTGTACATTGAAGTG  
 CY013278 CCCAGTTGCTGGTGGAACAGCAGTGTGTACATTGAAGTG  
 CY009347 CCCAGTTGCTGGTGGAACAGCAGTGTGTACATTGAAGTG

721

AJ404630 TTGCATTTGACTCAAGGAACATGCTGGGAGCAGATGTACA  
 JX046923 TTGCATTTAACCCCAAGGGACGTGCTGGGAGCAGATGTACA  
 CY049984 TTGCATTTAACCCCAAGGGACGTGCTGGGAGCAGATGTACA  
 GQ132138.1| TTGCATTTAACCCCAAGGGACGTGCTGGGAGCAGATGTACA  
 CY006674 TTGCATTTAACAACAGGGGACATGCTGGGAGCAGATGTACA  
 DQ208309 TTGCATTTGACTCAAGGAACATGCTGGGAACAGATGTACA  
 CY118921 TTACATTTGACTCAAGGAACGTGTTGGGAACAAATGTACA  
 CY113372 TTACATTTGACTCAAGGAACGTGTTGGGAACAAATGTACA  
 CY112844 TTACATTTGACTCAAGGAACGTGTTGGGAACAAATGTACA  
 CY020452 TTGCATTTGACTCAAGGAACATGCTGGGAACAGATGTACA  
 CY021964 TTGCATTTGACTCAAGGAACATGCTGGGAACAGATGTATA  
 CY009611 TTGCATTTGACTCAAGGAACATGCTGGGAACAGATGTACA  
 CY045779 TTGCATTTGACTCAAGGAACATGCTGGGAACAGATGTACA  
 CY010379 TTGCATTTAACAACAGGGAACATGCTGGGAACAGATGTACA  
 CY021044 TTGCATTTAACAACAGGGAACATGCTGGGAACAGATGTACA  
 CY032268 TTACATTTGACTCAAGGAACATGTTGGGAACAGATGTACA  
 CY080530 TTACATTTGACTCAAGGAACGTGTTGGGAACAGATGTACA  
 CY087807 TTGCATTTGACTCAAGGAACATGCTGGGAACAGATGTACA  
 CY013278 TTGCATTTGACTCAAGGAACATGCTGGGAACAGATGTACA  
 CY009347 TTGCATTTGACTCAAGGAACATGCTGGGAACAGATGTACA

761

AJ404630 CACCAGGAGGGGAGGTAAAGAAATGATGATGTTGACCAAAG  
 JX046923 CTCCAGGAGGAGAAAGTGAGAAATGATGATGTTGACCAAAG  
 CY049984 CTCCAGGAGGAGAAAGTGAGAAATGATGATGTTGACCAAAG  
 GQ132138.1| CTCCAGGAGGAGAAAGTGAGAAATGATGATGTTGACCAAAG  
 CY006674 CTCCAGGTGGGGAGGTGAGGAATGATGATGTTGATCAAAG  
 DQ208309 CTCCAGGAGGGGAAAGTGAGGAATGATGATGTTGATCAAAG  
 CY118921 CTCCAGGTGGAGAAAGTGAGGAATGACGATGTTGACCAAAG  
 CY113372 CTCCAGGTGGAGAAAGTGAGGAATGACGATGTTGACCAAAG  
 CY112844 CTCCAGGTGGAGAGGTGAGGAATGACGATGTTGACCAAAG  
 CY020452 CTCCAGGAGGGGAAAGTGAGGAATGATGATGTTGATCAAAG  
 CY021964 CTCCAGGAGGGGAAAGTGAGGAATGATGATGTTGATCAAAG  
 CY009611 CTCCAGGAGGGGAGGTGAGGAATGATGATGTTGATCAAAG  
 CY045779 CTCCAGGAGGGGAGGTGAAGAAATGATGATGTTGATCAAAG  
 CY010379 CTCCAGGTGGAGAAAGTGAGGAATGATGATGTTGATCAAAG  
 CY021044 CTCCAGGTGGAGAAAGTGAGGAATGATGATGTTGATCAAAG  
 CY032268 CTCCAGGTGGAGAAAGTGAGGAATGATGATGTTGATCAAAG  
 CY080530 CTCCAGGTGGAGAAAGTGAGGAATGATGATGTTGATCAAAG  
 CY087807 CTCCAGGTGGAGAAAGTGAGGAATGATGATGTTGATCAAAG  
 CY013278 CTCCAGGTGGAGAAAGTGAGGAATGATGATGTTGATCAAAG  
 CY009347 CTCCAGGTGGAGAAAGTGAGGAATGATGATGTTGATCAAAG

801

AJ404630 TTTAATTATTGCTGCTAGGAACATAGTGAGGAGAGCAACA  
 JX046923 TTTGATCATCGCTGCTAGAAAATATAGTAAGAAGAGCAGCA  
 CY049984 TTTGATTATCGCTGCTAGAAAACATAGTAAGAAGAGCAGCA  
 GQ132138.1| TTTGATTATCGCTGCTAGAAAACATAGTAAGAAGAGCAGCA  
 CY006674 CCTAATTATTGCTGCTAGGAACATAGTGAGAAGAGCTGCA  
 DQ208309 CTTAATTATTGCTGCTAGGAACATAGTGAGAAGAGCGACA  
 CY118921 CCTAATTATTGCGGCCAGGAACATAGTAAGAAGAGCCGCA  
 CY113372 CCTAATTATTGCAGCCAGGAACATAGTGAGAAGAGCCGCA  
 CY112844 CCTAATTATTGCAGCCAGGAACATAGTAAGAAGAGCCGCA  
 CY020452 CTTGATTATTGCTGCTAGGAACATAGTGAGAAGAGCTGCA  
 CY021964 CTTGATTATTGCTGCTAGGAACATAGTGAGAAGAGCTGCA  
 CY009611 CTTAATTATTGCTGCTAGGAACATAGTAAGAAGAGCCACA  
 CY045779 CTTAATTATTGCTGCTAGGAACATAGTGAGAAGAGCTACA  
 CY010379 CCTAATTATTGCTGCTAGGAACATAGTGAGAAGAGCTGCA  
 CY021044 CCTAATTATTGCTGCTAGGAACATAGTGAGAAGAGCTGCA  
 CY032268 TCTAATTATTGCAGCCAGGAACATAGTGAGAAGAGCAGCA  
 CY080530 TCTAATTATTGCAGCCAGGAACATAGTGAGAAGAGCTGCA  
 CY087807 TCTAATTATTGCAGCCAGGAACATAGTGAGAAGAGCAGCA  
 CY013278 CCTAATTATTGCTGCCAGGAACATAGTGAGAAGAGCTGCA  
 CY009347 CCTAATTATTGCTGCCAGGAACATAGTGAGAAGGGCCGCT

841

AJ404630 GTATCAGCAGACCCATTGGCTTCACTCCTGGAAATGTGCC  
 JX046923 GTGTCAGCAGACCCATTAGCATCTCTCTTGGAAATGTGCC  
 CY049984 GTGTCAGCAGACCCATTAGCATCTCTCTTGGAAATGTGCC  
 GQ132138.1| GTGTCAGCAGACCCATTAGCATCTCTCTTGGAAATGTGCC  
 CY006674 GTATCAGCAGATCCACTAGCATCTTTATTAGAAATGTGCC  
 DQ208309 GTGTCAGCAGATCCACTAGCATCTCTCTTGGAAATGTGCC  
 CY118921 GTATCAGCAGATCCACTAGCATCTTTATTGGAGATGTGCC  
 CY113372 GTATCGGCAGATCCACTAGCATCTTTATTAGAGATGTGCC  
 CY112844 GTATCAGCAGATCCACTAGCATCTTTATTGGAGATGTGCC  
 CY020452 GTATCAGCAGATCCACTAGCATCTTTATTGGAGATGTGCC  
 CY021964 GTATCAGCAGATCCACTAGCATCTTTATTGGAGATGTGCC  
 CY009611 GTATCAGCAGATCCACTAGCATCTTTATTGGAGATGTGCC  
 CY045779 GTATCAGCAGATCCACTAGCATCTTTATTGGAGATGTGCC  
 CY010379 GTATCAGCAGATCCACTAGCATCTTTATTGGAAATGTGCC  
 CY021044 GTATCAGCAGATCCACTAGCATCTTTATTGGAAATGTGCC  
 CY032268 GTATCAGCAGATCCACTAGCATCTTTATTGGAGATGTGCC  
 CY080530 GTATCAGCAGATCCACTAGCATCTTTATTGGAGATGTGCC  
 CY087807 GTATCAGCAGATCCACTAGCATCTTTATTGGAGATGTGCC  
 CY013278 GTATCAGCAGATCCACTAGCATCTTTATTGGAGATGTGCC  
 CY009347 GTATCAGCAGATCCACTAGCATCTTTATTGGAGATGTGCC

881

AJ404630 ATAGCACACAAATTGGCGGAGTAAGGAATGGTAGACATCCT  
 JX046923 ACAGCACACAGATTGGAGGAGTAAGGATGGTGGACATCCT  
 CY049984 ACAGCACACAGATTGGAGGAGTAAGGATGGTGGACATCCT  
 GQ132138.1| ACAGCACACAGATTGGAGGAGTAAGGATGGTGGACATCCT  
 CY006674 ATAGCACACAGATTGGTGGAAACAAGGAATGGTGGATATTCT  
 DQ208309 ACAGCACACAGATTGGTGGAAACAAGGATGGTAGACATCCT  
 CY118921 ACAGCACACAAATTGGCGGGACAAGGATGGTGGACATTCT  
 CY113372 ACAGCACACAAATTGGCGGGACAAGGATGGTGGACATTCT  
 CY112844 ACAGCACACAAATTGGCGGGACAAGGATGGTGGACATTCT  
 CY020452 ACAGCACACAGATTGGTGGAAATAGGATGGTAGACATCCT  
 CY021964 ACAGCACACAGATTGGTGGAAATAGGATGGTAGACATCCT  
 CY009611 ACAGCACGCAAGATTGGTGGAAACAAGGATGGTAGACATCCT  
 CY045779 ACAGCACACAAATTGGTGGAAACAAGGATGGTAGACATCCT  
 CY010379 ACAGCACACAGATTGGTGGAAACAAGGATGGTGGACATTCT  
 CY021044 ACAGCACACAGATTGGTGGAAACAAGGATGGTGGACATTCT  
 CY032268 ACAGCACACAGATTGGCGGGACAAGGATGGTGGACATTCT  
 CY080530 ACAGCACACAGATTGGCGGGACAAGGATGGTGGACATTCT  
 CY087807 ACAGCACACAGATTGGCGGGACAAGGATGGTGGACATTCT  
 CY013278 ATAGCACACAGATTGGTGGGACAAAGATGGTGGACATTCT  
 CY009347 ACAGCACACAGATTGGTGGGACAAGGATGGTGGACATTCT

921

AJ404630 TAAACAAAACCCAAACAGAAGAGCAAGCTGTAGATATATGC  
 JX046923 TAAACAGAATCCAACAGGAAACAAGCCGTAGACATATGC  
 CY049984 TAGACAGAATCCAACAGGAAACAAGCCGTAGACATATGC  
 GQ132138.1| TAGACAGAATCCAACAGGAAACAAGCCGTAGACATATGC  
 CY006674 CAGACAAAATCCAACAGAAGAACAAAGCTGTGGACATATGC  
 DQ208309 TAGGCAGAACCCGACAGAAGAGCAAGCCGTGGATATATGC  
 CY118921 TAGACAGAACCCGACTGAAGAACAAAGCTGTGGATATATGC  
 CY113372 TAGGCAGAACCCGACGGAAGAACAAAGCTGTGGATATATGC  
 CY112844 TAGGCAGAACCCGACGGAAGAACAAAGCTGTGGATATATGC  
 CY020452 TAGGCAGAACCCAAACAGAAGAGCAAGCCGTGGATATATGC  
 CY021964 TAGGCAGAACCCAAACAGAAGAGCAAGCCGTGGATATATGC  
 CY009611 TAGGCAGAACCCAAACAGAAGAGCAAGCCGTGGATATATGC  
 CY045779 TAGGCAGAACCCAAACAGAGGAGCAAGCCGTGGATATATGC  
 CY010379 TAGGCAGAACCCAAACAGAAGAGCAAGCTGTGGATATATGC  
 CY021044 TAGGCAAAATCCAACAGAAGAGCAAGCTGTGGATATATGC  
 CY032268 TAGGCAGAACCCAAACGGAAGAACAAAGCTGTGGATATATGC  
 CY080530 TAGGCAGAACCCAAACGGAAGAACAAAGCTGTGGATATATGC  
 CY087807 TAGGCAGAACCCAAACGGAAGAGCAAGCTGTGGATATATGC  
 CY013278 TAGGCAGAACCCAAACAGAAGAGCAAGCTGTGGATATATGC  
 CY009347 TAGGCAGAACCCAAACGGAAGAGCAAGCTGTGGATATATGC



961

AJ404630 AAGGCAGCAATGGGTTTGAAAAATCAGCTCATCCCTTCAGCT  
 JX046923 AAGGCAGCAATAGGGTTTGAGGATCAGCTCATCTTTTCAGTT  
 CY049984 AAGGCAGCAATAGGGTTTGAGGATTAGCTCATCTTTTCAGTT  
 GQ132138.1| AAGGCAGCAATAGGGTTTGAGGATTAGCTCATCTTTTCAGTT  
 CY006674 AAAGCAGCAATGGGGCTGAGAATCAGTTTCATCCCTTCAGTT  
 DQ208309 AAGGCAGCAATGGGCCTGAGAATTAGCTCATCCCTTCAGCT  
 CY118921 AAGGCTGCAATGGGATTGAGAATCAGCTCATCCCTTCAGCT  
 CY113372 AAGGCTGCAATGGGACTGAGAATCAGCTCATCCCTTCAGCT  
 CY112844 AAGGCTGCAATGGGATTGAGAATCAGCTCATCCCTTCAGCT  
 CY020452 AAGGCTGCAATGGGACTGAGAATTAGCTCATCCCTTCAGTT  
 CY021964 AAGGCTGCAATGGGACTGAGAATTAGCTCATCCCTTCAGTT  
 CY009611 AAGGCTGCAATGGGACTGAGAATTAGCTCATCCCTTCAGTT  
 CY045779 AAGGCTGCAATGGGACTGAGAATTAGCTCATCCCTTCAGTT  
 CY010379 AAGGCTGCAATGGGACTGAGAATCAGCTCATCCCTTCAGTT  
 CY021044 AAGGCAGCAATGGGACTGAGAATCAGCTCATCCCTTCAGTT  
 CY032268 AAGGCTGCAATGGGACTGAGAATCAGCTCATCCCTTCAGTT  
 CY080530 AAAGCTGCAATGGGACTGAGAATCAGCTCGTCCCTTCAGTT  
 CY087807 AAGGCTGCAATGGGACTGAGAATCAGCTCATCCCTTCAGTT  
 CY013278 AAGGCTGCAATGGGACTGAGAATCAGCTCATCCCTTCAGTT  
 CY009347 AAGGCTGCAATGGGACTGAGAATCAGCTCATCCCTTCAGTT

1001

AJ404630 TTGGAGGGTTTCACTTTTCAAAAAGAACAAAGGGGTCTTCTGT  
 JX046923 TTGGTGGGTTTCACTTTTCAAAAAGGACAAGCGGATCATCAGT  
 CY049984 TTGGTGGGTTTCACTTTTCAAAAAGGACAAGCGGATCATCAGT  
 GQ132138.1| TTGGTGGGTTTCACTTTTCAAAAAGGACAAGCGGATCATCAGT  
 CY006674 TTGGCGGATTTCACATTTAAGAGAACAAAGTGGATCATCAGT  
 DQ208309 TTGGCGGATTTCACATTTAAGAGGACAAGTGGCTCATCAGT  
 CY118921 TTGGTGGGTTTACATTTTAAAAGAACAAAGCGGGTCATCAGT  
 CY113372 TTGGTGGGTTTACATTTTAAAAGAACAAAGCGGGTCCCTCAAT  
 CY112844 TTGGTGGGTTTACATTTTAAAAGAACAAAGCGGGTCATCAGT  
 CY020452 TTGGTGGATTTCACATTTAAGAGAACAAAGCGGATCATCAGT  
 CY021964 TTGGTGGATTTCACATTTAAGAGAACAAAGCGGATCATCAGT  
 CY009611 TTGGTGGATTTCACATTTAAGAGAACAAAGCGGATCATCAGT  
 CY045779 TTGGTGGATTTCACATTTAAGAGAACAAAGCGGATCATCAGT  
 CY010379 TTGGCGGGTTTCACATTTAAGAGAACAAAGCGGATCATCAGT  
 CY021044 TTGGCGGGTTTCACATTTAAGAGAACAAAGCGGATCATCAGT  
 CY032268 TTGGCGGGTTTCACATTTAAGAGAACAAAGCGGGTCATCAAT  
 CY080530 TTGGCGGATTTCACATTTAAGAGAACAAAGCGGGTCATCAAT  
 CY087807 TTGGCGGGTTTCACATTTAAGAGAACAAAGCGGATCATCAGT  
 CY013278 TTGGCGGATTTCACATTTAAGAGAACAAAGCGGATCATCAGT  
 CY009347 TTGGCGGGTTTCACATTTAAGAGAACAAAGCGGATCATCAGT

1041

AJ404630 CAAAAGAGAGGAAGAAGTGTGTTACAGGCAACCTCCAAACA  
 JX046923 CAAGAAAGAAGAAGAAATGCTAACGGGCAACCTCCAAACA  
 CY049984 CAAGAAAAGAAGAAGAAGTGTGTTACGGGCAACCTCCAAACA  
 GQ132138.1| CAAGAAAAGAAGAAGAAGTGTGTTACGGGCAACCTCCAAACA  
 CY006674 CAAAAGGGAGGAAGAAGTGTGTTACGGGCAATCTGCAAACA  
 DQ208309 CAAGAGAGAGGAAGAAGTGTGTTACAGGCAATCTTCAAACA  
 CY118921 CAAAAAAGAGGAAGAAGTGTGTTACAGGCAATCTCCAAACA  
 CY113372 CAAAAAAGAGGAAGAAGTGTGTTACAGGCAATCTCCAAACA  
 CY112844 CAAAAGAGATGAAGAAGTGTGTTACAGGCAATCTCCAAACA  
 CY020452 CAAGAGAGAGGAAGAAGTGTGTTACGGGCAATCTTCAAACA  
 CY021964 CAAGAGAGAGGAAGAAGTGTGTTACGGGCAATCTTCAAACG  
 CY009611 CAAGAGAGAGGAAGAAGTGTGTTACGGGCAATCTTCAGACA  
 CY045779 CAAGAGAGAGGAAGAAGTGTGTTACGGGCAATCTTCAGACA  
 CY010379 CAAGAGAGAGGAAGAAGTGTGTTACGGGCAATCTTCAAACA  
 CY021044 CAAGAGAGAGGAAGAAGTGTGTTACGGGCAATCTGCAAACA  
 CY032268 CAAGAGAGAGGAAGAAGTGTGTTACGGGCAATCTCCAAACA  
 CY080530 CAAGAGAGAGGAAGAAGTGTGTTACGGGCAATCTCCAAACA  
 CY087807 CAAGAGAGAGGAAGAAGTGTGTTACGGGCAATCTTCAAACA  
 CY013278 CAAGAGAGAGGAAGAAGTGTGTTACGGGCAATCTTCAAACA  
 CY009347 CAAGAGAGAGGAAGAAGTGTGTTACGGGCAATCTTCAAACA

1081

AJ404630 TTGAAGATATAAAGTACATGAAGGATATGAGGAATTACAA  
 JX046923 CTGAAATTAAAGACTACATGAAGGGTATGAAGAAATTCACAA  
 CY049984 CTGAAAAATAAGAGTACATGAAGGGTATGAAGAAATTCACAA  
 GQ132138.1| CTGAAAAATAAGAGTACATGAAGGGTATGAAGAAATTCACAA  
 CY006674 TTGAAGCTAACTGTCATGAGGGATATGAAGAAATTCACAA  
 DQ208309 TTGAAGATAAAGAGTGCATGAGGGATATGAAGAGTTACAA  
 CY118921 TTGAAGATAAAGGCTACATGAGGGGTATGAGGAGTTACAA  
 CY113372 TTGAAAAATAAGAGTGCATGAGGGGTACGAGGAGTTACAA  
 CY112844 TTGAAAAATAAGAGTACATGAGGGGTATGAGGAGTTACAA  
 CY020452 TTGAAGATAAAGAGTGCATGAGGGATATGAAGAGTTACAA  
 CY021964 TTGAAGATAAAGAGTGCATGAGGGATATGAAGAGTTACAA  
 CY009611 TTGAAGATAAAGAGTGCATGAGGGATATGAAGAGTTACAA  
 CY045779 TTGAAGATAAAGAGTACATGAGGGATATGAAGAGTTACAA  
 CY010379 TTGAAGATAAAGGTGCATGAGGGATATGAAGAGTTACAA  
 CY021044 TTGAAGCTAAAGGTGCATGAGGGGTTTGAAGAGTTACAA  
 CY032268 TTGAAAAATAAGGCTGCATGAGGGGTACGAGGAATTCACAA  
 CY080530 TTGAAAAATAAGGCTGCATGAGGGATACGAGGAATTCACAA  
 CY087807 TTGAAAAATAAGGGTGCATGAGGGATACGAGGAGTTACAA  
 CY013278 TTGAAGATAAAGGCTGCATGATGGATATGAAGAGTTACAA  
 CY009347 TTGAAGATAAAGGCTGCATGAGGGATATGAGGAGTTACAA

1121

AJ404630 TGGTTGGACGAAGAGCAACAGCCATTCTAAGAAAAGCAAC  
 JX046923 TGGTTGGGAGAAGAGCAACAGCTATTCTCAGAAAGGCAAC  
 CY049984 TGGTTGGGAGAAGAGCAACAGCTATTCTCAGAAAGGCAAC  
 GQ132138.1| TGGTTGGGAGAAGAGCAACAGCTATTCTCAGAAAGGCAAC  
 CY006674 TGGTTGGGAAAAAGGGCAACAGCTATACTCAGAAAAGCAAC  
 DQ208309 TGGTTGGGAGAAGAGCAACAGCTATACTCAGAAAAGCGAC  
 CY118921 TGGTTGGGGAAAAAGAGCAACAGCTATACTCAGAAAAGCAAC  
 CY113372 TGGTTGGGGAAAAAGGGCAACAGCTATACTCAGAAAAGCAAC  
 CY112844 TGGTTGGGAAAAAGAGCAACAGCCATACTCAGAAAAGCAAC  
 CY020452 TGGTTGGGAGAAGAGCAACAGCTATACTCAGAAAAGCAAC  
 CY021964 TGGTTGGGAGAAGAGCAACAGCCATACTCAGAAAAGCAAC  
 CY009611 TGGTTGGGAGAAGAGCAACAGCTATACTCAGAAAAGCAAC  
 CY045779 TGGTTGGGAGAAGAGCAACAGCTATACTCAGAAAAGCAAC  
 CY010379 TGGTTGGGAAAAAGGGCAACAGCGATACTCAGAAAAGCAAC  
 CY021044 TGGTTGGGAAAAAGGGCAACAGCTATACTCAGAAAAGCAAC  
 CY032268 TGGTTGGGGAAAAAGGGCAACAGCTATACTCAGAAAAGCAAC  
 CY080530 TGGTTGGGGAAAAAGGGCAACAGCTATACTCAGAAAAGCAAC  
 CY087807 TGGTTGGGAAAAAGGGCAACAGCTATACTCAGAAAAGCAAC  
 CY013278 TGGTTGGGAAAAAGGGCAACAGCTATACTCAGAAAAGCAAC  
 CY009347 TGGTTGGGAAAAAGGGCAACAGCTATACTCAGAAAAGAAAC

1161

AJ404630 CAGAAGGATGATCCAATGATAGTCAGCGGAAGGGACGAG  
 JX046923 CAGGAGATTGATCCAATTGATAGTAAGCGGGAGAGACGAG  
 CY049984 CAGGAGATTGATCCAGTTGATAGTAAGCGGGAGAGACGAG  
 GQ132138.1| CAGGAGATTGATCCAGTTGATAGTAAGCGGGAGAGACGAG  
 CY006674 CAGGAGATTGATTCAACTAATAGTGAGTGGAAAGAGACGAA  
 DQ208309 CAGGAGATTGATTCAGCTGATAGTGAGTGGGAGAGACGAA  
 CY118921 CAGAAGATTGGTTCAACTCATAGTGAGTGGAAAGAGACGAA  
 CY113372 CAGGAGATTGGTTCAAGCTTATAGTGAGTGGAAAGGGACGAA  
 CY112844 CAGGAGATTGGTTCAAGCTCATAGTGAGTGGAAAGGGACGAA  
 CY020452 CAGGAGATTGATTCAGCTGATAGTGAGTGGGAGAGACGAA  
 CY021964 CAGGAGATTGATTCAGCTGATAGTGAGTGGGAGAGACGAA  
 CY009611 CAGGAGATTGATTCAGCTGATAGTGAGTGGGAGAGACGAA  
 CY045779 AAGGAGATTGATTCAGCTGATAGTGAGTGGGAGAGATTGAA  
 CY010379 CAGGAGATTGATTCAACTGATAGTGAGTGGAAAGAGACGAA  
 CY021044 CAGGAGATTGATTCAACTGATAGTGAGTGGAAAGAGACGAA  
 CY032268 CAGGAGATTGGTTCAAGCTGATAGTGAGTGGAAAGAGACGAA  
 CY080530 CAGGAGATTGGTTCAAGCTGATAGTGAGTGGAAAGAGACGAA  
 CY087807 CAGGAGATTGATTCAGCTGATAGTGAGTGGAAAGAGACGAA  
 CY013278 CAGGAGATTGATTCAGCTGATAGTGAGTGGAAAGAGACGAA  
 CY009347 CAGGAGATTGATTCAACTGATTGTGAGTGGAAAGAGACGAA

1201

AJ404630  
 JX046923  
 CY049984  
 GQ132138.1|  
 DQ208309  
 CY118921  
 CY113372  
 CY112844  
 CY020452  
 CY021964  
 CY009611  
 CY045779  
 CY010379  
 CY021044  
 CY032268  
 CY080530  
 CY087807  
 CY013278  
 CY009347

1241

AJ404630  
 JX046923  
 CY049984  
 GQ132138.1|  
 CY006674  
 DQ208309  
 CY118921  
 CY113372  
 CY112844  
 CY020452  
 CY021964  
 CY009611  
 CY045779  
 CY010379  
 CY021044  
 CY032268  
 CY080530  
 CY087807  
 CY013278  
 CY009347

1281

AJ404630  
 JX046923  
 CY049984  
 GQ132138.1|  
 CY006674  
 DQ208309  
 CY118921  
 CY113372  
 CY112844  
 CY020452  
 CY021964  
 CY009611  
 CY045779  
 CY010379  
 CY021044  
 CY032268  
 CY080530  
 CY087807  
 CY013278  
 CY009347

1321

AJ404630 CACCAACTCTTGAGACATTTTCAAAAAGGATGCAAAAGTGC  
JX046923 CACCAACTCTTGAGGCATTTTCAAAAAGATGCAAAAGTGC  
CY049984 CACCAACTCTTGAGGCATTTTCAAAAAGATGCAAAAGTGC  
GQ132138.1| CACCAACTCTTGAGGCATTTTCAAAAAGATGCAAAAGTGC  
CY006674 CATCAACTTTTGAGACATTTTCAGAAAGGATGCTAAAAGTAC  
DQ208309 CATCAACTTTTGAGGCATTTTCAAAAAGGATGCGAAAGTGC  
CY118921 CACCAGCTTTTAAAGGCATTTTCAGAAAAGATGCGAAAGTGC  
CY113372 CATCAGCTTTTAAAGGCATTTTCAGAAAAGATGCGAAAGTGC  
CY112844 CATCAACTTTTAAAGGCATTTTCAGAAAAGATGCGAAAGTGC  
CY020452 CATCAACTTTTAAAGACATTTTCAGAAAGGATGCGAAAGTGC  
CY021964 CATCAACTTTTAAAGACATTTTCAGAAAGGATGCGAAAGTGC  
CY009611 CACCAACTTTTGAGACATTTTCAGAAAGGATGCAAAAGTGC  
CY045779 CACCAACTTTTGAGACATTTTCAGAAAGGATGCGAAAGTGC  
CY010379 CATCAACTTTTGAGACATTTTCAGAAAGGATGCTAAAAGTGC  
CY021044 CATCAACTTTTGAGACATTTTCAGAAAAGATGCTAAAAGTGC  
CY032268 CATCAACTTTTAAAGACATTTTCAGAAAAGATGCGAAAGTGC  
CY080530 CATCAACTTTTAAAGGCATTTTCAGAAAAGATGCGAAAGTGC  
CY087807 CATCAACTTTTAAAGACATTTTCAGAAAGGATGCGAAAGTGC  
CY013278 CATCAACTTTTAAAGACATTTTCAGAAAGGATGCGAAAGTGC  
CY009347 CATCAACTTTTAAAGACATTTTCAGAAAGGATGCGAAAGTGC

1361

AJ404630 TGTTCCTTCAAAACTGGGGAATTGAACCCATCGACAATGTGAT  
JX046923 TTTTCCAGAAGTGGGGAATTGAATCCATCGACAGTGTGAT  
CY049984 TTTTCCAGAAGTGGGGAATTGAATCCATCGACAATGTGAT  
GQ132138.1| TTTTCCAGAAGTGGGGAATTGAATCCATCGACAATGTGAT  
CY006674 TTTTCTTAAATTTGGGGAATTGAACATATTCGACAATGTGAT  
DQ208309 TTTTTCAAAATTTGGGGAATTGAACCCATCGACAATGTGAT  
CY118921 TTTTTCAAAATTTGGGGAATTGAACACATCGACAGTGTGAT  
CY113372 TTTTTCAGAATTTGGGGAATTGAACATATTCGACAGTGTGAT  
CY112844 TTTTTCAGAATTTGGGGAATTGAACACATCGACAGTGTGAT  
CY020452 TTTTTCAAAATTTGGGGAGTTGAACCTATCGACAATGTGAT  
CY021964 TTTTTCAAAATTTGGGGAGTTGAACCTATCGACAATGTGAT  
CY009611 TCTTTCAAAAATTTGGGGAATTGAATCCATCGACAATGTGAT  
CY045779 TCTTTCAAAAATTTGGGGAATTGAACCCATCGACAATGTGAT  
CY010379 TTTTCCAAAATTTGGGGAATTGAACCTATCGACAATGTGAT  
CY021044 TTTTCCAAAATTTGGGGAATTGAACCTATCGACAATGTGAT  
CY032268 TTTTTCAAAATTTGGGGAATTGAACATATTCGACAATGTAAT  
CY080530 TTTTTCAAAATTTGGGGAATTGAACATATTCGACAATGTAAT  
CY087807 TTTTTCAAAATTTGGGGAATTGAACATATTCGACAATGTGAT  
CY013278 TTTTTCAAAATTTGGGGAATTGAGCATATCGACAGTGTGAT  
CY009347 TTTTTCAAAATTTGGGGAATTGAACATATTCGACAATGTGAT

1401

AJ404630 GGGTATGATTGGAATATTGCGTGACATGACCCCCAGCAGC  
JX046923 GGGAAATGATCGGAATACTGCCCGACATGACCCCCAAGCAGC  
CY049984 GGGAAATGATCGGAATACTGCCCGACATGACCCCCAAGCAGC  
GQ132138.1| GGGAAATGATCGGAATAATGCCCGACATGACCCCCAAGCAGC  
CY006674 GGGAAATGATTGGGATATTACCTGATATGACTCCAAGTACC  
DQ208309 GGGAAATGATTGGGATATTGCCCGACATGACTCCAAGTACT  
CY118921 GGGAAATGGTTGGAGTATTACCAAGATATGACTCCAAGCACA  
CY113372 GGGAAATGGTTGGAGTATTACCAAGATATGACTCCAAGCACA  
CY112844 GGGAAATGGTTGGAGTATTACCAAGATATGACTCCAAGCACA  
CY020452 GGGAAATGATTGGGATATTGCCCGACATGACTCCAAGCATC  
CY021964 GGGAAATGATTGGGATATTGCCCGACATGACTCCAAGCATC  
CY009611 GGGAAATGATTGGGATATTGCCCGACATGACTCCAAGCACC  
CY045779 GGGGATGATTGGGATATTGCCCGACATGACTCCAAGCACC  
CY010379 GGGAAATGATTGGGATATTACCGACATGACTTCAAGCACC  
CY021044 GGGAAATGATTGGGATATTACCGACATGACTCCAAGCACC  
CY032268 GGGAAATGATTGGAGTATTACCAAGACATGACTCCAAGCACA  
CY080530 GGGGATGATTGGAGTATTACCAAGACATGACTCCAAGCACA  
CY087807 GGGAAATGATTGGGGTATTACCAAGACATGACTCCAAGCACA  
CY013278 GGGAAATGATTGGGATATTACCAAGACATGACTCCAAGCACA  
CY009347 GGGAAATGATTGGGATATTACCAAGACATGACTCCAAGCACA

1441

AJ404630 GAAATGTCACCTAAGAGGAGTGAGAGTTAGCAAAATGGGGG  
JX046923 GAGATGTCGCTGAGAGGGATAAGAGTCAGCAAGATGGGGG  
CY049984 GAGATGTCGCTGAGAGGGATAAGAGTCAGCAAAATGGGAG  
GQ132138.1| GAGATGTCGCTGAGAGGGATAAGAGTCAGCAAAATGGGAG  
CY006674 GAGATGTCAAATGAGAGGAGTGAGAGTCAGCAAAATGGGTG  
DQ208309 GAGATGTCAAATGAGAGGAGTGAGAGTCAGCAAAATGGGAG  
CY118921 GAGATGTCAAATGAGAGGAATAAGAGTCAGCAAAATGGGTG  
CY113372 GAAATGTCAAATGAGAGGAATAAGAGTCAGCAAAATGGGCG  
CY112844 GAGATGTCAAATGAGAGGAATAAGAGTCAGCAAAATGGGCG  
CY020452 GAGATGTCAAATGAGAGGAGTGAGAGTCAGCAAAATGGGTG  
CY021964 GAGATGTCAAATGAGAGGAGTGAGAGTCAGCAAAATGGGTG  
CY009611 GAGATGTCAAATGAGAGGAGTGAGAGTCAGCAAAATGGGGG  
CY045779 GAGATGTCAAATGAGAGGAGTAAGAGTCAGCAAAATGGGTG  
CY010379 GAGATGTCAAATGAGAGGAGTGAGAGTCAGCAAAATGGGTG  
CY021044 GAGATGTCAAATGAGAGGAGTGAGAGTCAGCAAAATGGGTG  
CY032268 GAGATGTCAAATGAGAGGGATAAGAGTCAGCAAAATGGGCG  
CY080530 GAGATGTCAAATGAGAGGGATAAGAGTCAGCAAAATGGGCG  
CY087807 GAGATGTCAAATGAGAGGGGTAAAGAGTCAGCAAAATGGGCG  
CY013278 GAGATGTCAAATGAGAGGAGTGAGAGTCAGCAAAATGGGCG  
CY009347 GAGATGTCAAATGAGAGGAATAAGAGTCAGCAAAATGGGCG

1481

AJ404630 TGGATGAATATTCTAGCACTGAAAGGGTGGTCTGAGCAT  
JX046923 TGGATGAATACTCCAGCACGGAGAGTGGTAGTGAGTAT  
CY049984 TAGATGAATACTCCAGCACGGAGAGTGGTAGTGAGTAT  
GQ132138.1| TAGATGAATACTCCAGCACGGAGAGTGGTAGTGAGTAT  
CY006674 TAGATGAATACTCCAATGCTGAAAGGGTAGTGGTGAGCAT  
DQ208309 TAGATGAGTACTCCAGCACAGAGAGGGTGGTGGTGAGCAT  
CY118921 TGGATGAATACTCCAGTACAGAGAGGGTGGTGGTTAGCAT  
CY113372 TGGATGAATACTCCAGCACAGAGAGGGTGGTGGTTAGCAT  
CY112844 TGGACGAATACTCCAGTACAGAGAGGGTGGTGGTTAGCAT  
CY020452 TAGATGAGTACTCCAGCATGGAGAGGGTAGTGGTGAGCAT  
CY021964 TAGATGAGTACTCCAGCACGGAGAGGGTAGTGGTGAGCAT  
CY009611 TAGATGAGTATTCCAGCGCGGAGAAAGTAGTGGTGAGCAT  
CY045779 TAGATGAATACTCCAGCGCGGAGAGGGTAATGGTGAGCAT  
CY010379 TAGATGAATACTCCAACGCGGAGAGGGTAGTGGTGAGCAT  
CY021044 TAGATGAATACTCCAATGCGGAAAGAGTAGTGGTGAGCAT  
CY032268 TGGATGAATACTCCAGCACAGAGAGGGTAGTGGTGAGCAT  
CY080530 TGGATGAATACTCCAGCACAGAGAGGGTTGTGGTGAGCAT  
CY087807 TAGATGAATACTCCAGCGCGGAGAGAGTAGTGGTGAGCAT  
CY013278 TAGATGAATACTCCAGCGCGGAGAGGGTAGTGGTGAGCAT  
CY009347 TAGATGAATACTCCAGCGCGGAGAGGGTAGTGGTGAGCAT

1521

AJ404630 TGACCGTTTCTTAAGGGTCCGAGATCAGCGAGGAAATGTA  
JX046923 TGACCGATTTTTAAAGGGTTAGAGATCAAAGAGGGAACGTA  
CY049984 TGACCGATTTTTAAAGGGTTAGAGATCAAAGAGGGAACGTA  
GQ132138.1| TGACCGATTTTTAAAGGGTTAGAGATCAAAGAGGGAACGTA  
CY006674 TGACCGTTTTTTGAGAGTCCGGGACCAAAGAGGAAATGTA  
DQ208309 TGACCGCTTTTTTAAGAGTCCGGGACCAACGAGGAAACGTA  
CY118921 TGATCGGTTTTTTGAGAGTTGAGACCAACGTGGGAATGTA  
CY113372 TGACCGGTTTTTTGAGAGTTGAGACCAACGTGGGAATGTA  
CY112844 TGATCGGTTTTTTGAGAGTTGAGACCAACGTGGGAATGTA  
CY020452 TGACCGTTTTTTTTGAGAGTCCGGGACCAACGAGGAAATGTA  
CY021964 TGACCGTTTTTTTTGAGAATCCGGGACCAACGAGGAAATGTA  
CY009611 TGACCGTTTTTTTTGAGAGTCAGGGACCAACGTGGGAATGTA  
CY045779 TGACCGTTTTTTTTGAGAGTTCCGGGACCAACGAGGAAATGTA  
CY010379 TGACCGTTTTTTTTGAGAGTCCGGGACCAACGAGGAAATGTA  
CY021044 TGACCGTTTTTTTTGAGAGTCCGGGACCAAGAGGAAATGTA  
CY032268 TGACCGGTAATTTGAGAGTTGAGACCAACGAGGAAATGTA  
CY080530 TGACCGGTTTTTTGAGAGTTGAGACCAACGAGGAAATGTA  
CY087807 TGACCGGTTTTTTGAGAGTTGAGACCAACGAGGAAATGTA  
CY013278 TGACCGTTTTTTTTGAGAGTTCCGGGACCAACGAGGAAATGTA  
CY009347 TGACCGTTTTTTTTGAGAGTTCCGGGACCAACGAGGAAATGTA

1561

AJ404630 CTCTATCCCTGAAGAAGTTAGTGAAACACAGGGAAATGG  
 JX046923 CTATTGTCTCCCGAAGAAGTCAGTGAAACGCAAGGAACTG  
 CY049984 CTATTGTCTCCCGAAGAAGTCAGTGAAACGCAAGGAACTG  
 GQ132138.1| CTATTGTCTCCCGAAGAAGTCAGTGAAACGCAAGGAACTG  
 CY006674 CTACTGTCTCCAGAGGAAGTCAGTGAAACACAGGGAACAG  
 DQ208309 CTACTGTCTCCTGAGGAGGTCAGTGAAACACAGGGAACAG  
 CY118921 TTATTATCTCCTGAGGAGGTCAGTGAAACACAGGGAACAG  
 CY113372 TTACTATCTCCTGAGGAGGTCAGTGAAACACAGGGAACAG  
 CY112844 TTATTATCTCCTGAGGAGGTCAGTGAAACACAGGGAACAG  
 CY020452 CTACTGTCTCCCGAGGAGGTCAGTGAAACACAGGGAACAG  
 CY021964 CTACTGTCTCCCGAGGAGGTCAGTGAGACACAGGGAACAG  
 CY009611 CTACTGTCTCCCGAGGAGGTCAGTGAAACACAGGGAACAG  
 CY045779 CTACTGTCTCCCGAGGAGGTCAGTGAAACACAGGGAACAG  
 CY010379 CTACTGTCTCCAGAGGAGGTCAGTGAAACACAGGGAACAG  
 CY021044 CTACTGTCTCCAGAGGAGGTCAGTGAAACACAGGGAACAG  
 CY032268 TTACTATCTCCTGAGGAGGTCAGTGAAACACAGGGGACAG  
 CY080530 TTACTATCTCCTGAGGAGGTCAGTGAAACACAGGGGACAG  
 CY087807 CTACTATCTCCTGAGGAGGTCAGTGAAACACAGGGAACAG  
 CY013278 CTACTGTCTCCCGAGGAGGTCAGTGAAACACAGGGAACGG  
 CY009347 CTACTATCTCCCGAGGAGGTCAGTGAAACACAGGGAACAG

1601

AJ404630 AAAAGTTGACGATAAAGTTATTCATCGTCTATGATGTGGGA  
 JX046923 AGAAGTTGACAATAAAGTTATTCATCAATGATGTGGGA  
 CY049984 AGAAGTTGACAATAAAGTTATTCATCAATGATGTGGGA  
 GQ132138.1| AGAAGTTGACAATAAAGTTATTCATCAATGATGTGGGA  
 CY006674 AGAAACTGACAATAAAGTTACTCTTCATCAATGATGTGGGA  
 DQ208309 AGAAATTGACGATAAAGTTATTCATCGTCAATGATGTGGGA  
 CY118921 AGAGACTGACAATAAAGTTATTCATCGTCAATGATGTGGGA  
 CY113372 AGAGACTGACAATAAAGTTACTCATCGTCAATGATGTGGGA  
 CY112844 AGAGACTGACAATAAAGTTACTCATCGTCAATGATGTGGGA  
 CY020452 AGAAACTGACAATAAAGTTACTCATCGTCAATGATGTGGGA  
 CY021964 AGAAACTGACAATAAAGTTACTCATCGTCAATGATGTGGGA  
 CY009611 AGAAACTGACAATAAAGTTACTCATCGTCAATGATGTGGGA  
 CY045779 AGAAACTGACAATAAAGTTACTCATCGTCAATGATGTGGGA  
 CY010379 AGAAACTGACAATAAAGTTACTCTTCGTCAATGATGTGGGA  
 CY021044 AGAAACTGACAATAAAGTTACTCTTCGTCAATGATGTGGGA  
 CY032268 AGAAACTGACAATAAAGTTACTCATCGTCAATGATGTGGGA  
 CY080530 AGAAACTGACAATAAAGTTACTCATCGTCAATGATGTGGGA  
 CY087807 AGAAACTGACAATAAAGTTACTCATCGTCAATGATGTGGGA  
 CY013278 AGAAACTGACAATAAAGTTACTCATCGTCAATGATGTGGGA  
 CY009347 AGAAACTGACAATAAAGTTACTCATCTTCATGATGTGGGA

1641

AJ404630 GATTAACGGGCCGAGATCAGTGCTAGTTAACACATATCAA  
 JX046923 GATCAATGGCCCTGAGTCAGTGCTAGTCAACACTTATCAA  
 CY049984 GATCAATGGCCCTGAGTCAGTGCTAGTCAACACTTATCAA  
 GQ132138.1| GATCAATGGCCCTGAGTCAGTGTTGATCAATACCTATCAG  
 CY006674 GATTAATGGCCCTGAGTCAGTGTTGATCAATACCTATCAG  
 DQ208309 GGTTAATGGCCCTGAATCAGTGTTGGTCAACACCTATCAG  
 CY118921 GATTAACGGTCCTGAGTCGGTTTGGTCAATACCTATCAA  
 CY113372 GATTAACGGCCCTGAGTCGGTGTTGGTCAATACCTATCAA  
 CY112844 GATTAACGGTCCTGAGTCGGTTTGGTCAATACCTATCAA  
 CY020452 GATTAATGGTCCTGAATCAGTGTTGGTCAATACCTATCAA  
 CY021964 GATTAATGGTCCTGAATCAGTGTTGGTCAATACCTATCAA  
 CY009611 GATTAATGGTCCTGAATCAGTGTTGGTCAATACCTATCAG  
 CY045779 GATTAATGGTCCTGAATCAGTGTTGGTCAATACCTATCAG  
 CY010379 GATTAATGGCCCTGAGTCAGTGTTGGTCAATACCTATCAG  
 CY021044 GATTAATGGCCCTGAGTCAGTGTTGGTCAATACCTATCAG  
 CY032268 GATTAATGGCCCTGAGTCAGTGTTGGTCAATACCTATCAG  
 CY080530 GATTAATGGCCCTGAGTCAGTGTTGGTCAATACCTATCAG  
 CY087807 GATTAATGGCCCTGAGTCAGTGTTGGTCAATACCTATCAG  
 CY013278 GATTAATGGCCCTGAATCAGTGTTGGTCAATACCTATCAG  
 CY009347 GATTAATGGCCCTGAATCAGTATTGGTCAATACCTATCAG

1681

AJ404630 TGGATCATTAGGAATTGGGAGACTGTAAAGATCCAAATGGT  
 JX046923 TGGATAATCAGGAACTGGGAAATTTGTGAAAAATTCAAATGGT  
 CY049984 TGGATAATCAGGAACTGGGAAATTTGTGAAAAATTCAAATGGT  
 GQ132138.1| TGGATAATCAGGAACTGGGAAATTTGTGAAAAATTCAAATGGT  
 CY006674 TGGATCATCAGAAACTGGGAGACTGTTAAAAATTCAGTGGT  
 DQ208309 TGGATCATCAGAAACTGGGAAACTGTTAAAAATTCAGTGGT  
 CY118921 TGGATCATCAGAAATTTGGGAACTGTCAAAAAATTCAAATGGT  
 CY113372 TGGATCATCAGAAATTTGGGAAACTGTTAAAAATTCAAATGGT  
 CY112844 TGGATCATCAGAAATTTGGGAAACTGTCAAAAAATTCAAATGGT  
 CY020452 TGGATCATCAGAACTGGGAAACTGTTAAAAATTCAGTGGT  
 CY021964 TGGATCATCAGAAACTGGGAAACTGTTAAAAATTCAGTGGT  
 CY009611 TGGATCATCAGAACTGGGAAACTGTTAAAAATTCAGTGGT  
 CY045779 TGGATCATCAGAACTGGGAAACTGTTAAAAATTCAGTGGT  
 CY010379 TGGATCATCAGAACTGGGAGACTGTTAAAAATTCAGTGGT  
 CY021044 TGGATCATCAGAACTGGGAGACTGTTAAAAATTCAGTGGT  
 CY032268 TGGATCATCAGAACTGGGAAACTGTTAAAAATTCAAATGGT  
 CY080530 TGGATCATCAGAACTGGGAAACTGTCAAAAAATTCAAATGGT  
 CY087807 TGGATCATCAGAACTGGGAAACTGTTAAAAATCCAGTGGT  
 CY013278 TGGATCATCAGAACTGGGAAACTGTTAAAAATTCAGTGGT  
 CY009347 TGGATCATCAGAACTGGGAAACTGTTAAAAATTCAGTGGT

1721

AJ404630 CCCAAGAACCCACCATGCTATACAATAAGATGGAGTTTGA  
 JX046923 CACAAGATCCCACAATGTTATACAACAAAAATGGAAATTTGA  
 CY049984 CACAAGATCCCACAATGTTATACAACAAAAATGGAAATTTGA  
 GQ132138.1| CACAAGATCCCACAATGTTATACAACAAAAATGGAAATTTGA  
 CY006674 CTCAGAACCCCAACGATGCTATACAATAAAATGGAAATTTGA  
 DQ208309 CACAGAATCCTACAATGCTATACAATAAAATGGAAATTTGA  
 CY118921 CTCAGAATCCTGCAATGTTGTACAACAAAAATGGAAATTTGA  
 CY113372 CTCAGAATCCTGCAATGTTGTACAACAAAAATGGAAATTTGA  
 CY112844 CTCAGAATCCTGCAATGTTGTACAACAAAAATGGAAATTTGA  
 CY020452 CCCAGAACCCTACAATGCTATACAATAAAATGGAAATTTGA  
 CY021964 CCCAGAACCCTACAATGCTATACAATAAAATGGAAATTTGA  
 CY009611 CCCAGAATCCTGCAATGCTGTACAATAAAATGGAAATTTGA  
 CY045779 CTCAGAATCCTACAATGCTATACAATAAAATGGAAATTTGA  
 CY010379 CTCAGAACCCTACAATGCTATACAATAAAATGGAAATTTGA  
 CY021044 CTCAGAACCCTACAATGCTATACAATAAAATGGAAATTTGA  
 CY032268 CTCAGAACCCTACAATGCTATACAACAAAAATGGAAATTTGA  
 CY080530 CTCAGAATCCTACAATGTTATACAACAAAAATGGAAATTTGA  
 CY087807 CTCAGAATCCTACAATGCTATACAATAAAATGGAAATTTGA  
 CY013278 CTCAGAATCCTACAATGCTATACAATAAAATGGAAATTTGA  
 CY009347 CTCAGAATCCTACAATGCTATACAATAAACTGGAAATTTGA

1761

AJ404630 ACCATTTCAATCTTTAGTACCAAAGGCTGCCAGAAGCCAA  
 JX046923 ACCATTTTCAGTCTCTTGTCCCTAAGGCAACCAGAAGCCGG  
 CY049984 ACCATTTTCAGTCTCTTGTCCCTAAGGCAACCAGAAGCCGG  
 GQ132138.1| ACCATTTTCAGTCTCTTGTCCCTAAGGCAACCAGAAGCCGG  
 CY006674 ACCATTTCAATCTCTAGTCCCCAAGGCCATTAGAGGCCAA  
 DQ208309 GCCATTTTCAGTCTTTAGTTCCCTAAGGCCGCTAGAGGTCAA  
 CY118921 ACCATTTCAATCTTTAGTCCCCAAGGCCATTAGAGGCCAA  
 CY113372 ACCATTTTCAGTCTTTAGTTCCCTAAGGCCATTAGAGGCCAA  
 CY112844 ACCATTTCAATCTTTAGTTCCCTAAGGCCATTAGAGGCCAA  
 CY020452 ACCATTTTCAGTCTTTAGTACCTAAGGCCATTAGAGGCCAA  
 CY021964 ACCATTTTCAGTCTTTAGTACCTAAGGCCATTAGAGGCCAA  
 CY009611 GCCATTTTCAGTCTTTAGTTCCCAAAGGCCGCTAGAGGCCAA  
 CY045779 GCCATTTTCAGTCTTTAGTTCCCTAAGGCCGCTAGAGGCCAA  
 CY010379 GCCATTTTCAGTCTCTAGTTCCCTAAGGCCATTAGAGGCCAA  
 CY021044 ACCATTTTCAGTCTCTAGTTCCCAAGGCCATTAGAGGCCAA  
 CY032268 GCCATTTTCAGTCTTTAATTCCTAAGGCCATTAGAGGCCAA  
 CY080530 GCCATTTTCAGTCTTTAGTTCCCTAAGGCCATTAGAGGCCAA  
 CY087807 GCCATTTTCAGTCTTTAGTTCCCTAAGGCCATTAGAGGCCAA  
 CY013278 GCCATTTTCAGTCTTTAGTTCCCTAAGGCCATTAGAGGCCAA  
 CY009347 GCCATTTTCAGTCAATTAGTTCCCTAAGGCCATTAGAGGCCAA

1801

AJ404630 TATAGTGGATTTCGTGAGAACGOTATTCAGCAGATGGCTG  
JX046923 TACAGTGGATTTCGTAAGGACACTATTCAGCAAATGCGGG  
CY049984 TACAGTGGATTTCGTAAGGACACTGTTCCAGCAAATGCGGG  
GQ132138.1| TACAGTGGATTTCGTAAGGACACTGTTCCAGCAAATGCGGG  
CY006674 TACAGTGGGTTTGTGAGAACTCTATTTCAAACAAATGAGGG  
DQ208309 TACAGTGGGTTTGTGAGAACTCTGTTCCAGCAAATGAGGG  
CY118921 TACAGTGGGTTTGTGAGAACTCTATTTCAAACAAATGAGAG  
CY113372 TACAGTGGATTTCGTCAGAACTCTATTTCAAACAAATGAGAG  
CY112844 TACAGTGGATTTCGTCAGAACTCTATTTCAAACAAATGAGAG  
CY020452 TACAGTGGGTTTGTGAGAACTCTGTTCCAACAAATGAGGG  
CY021964 TACAGTGGGTTTGTGAGAACTCTGTTCCAACAAATGAGGG  
CY009611 TACAGTGGGTTTGTGAGAACTCTGTTCCAACAAATGAGGG  
CY045779 TACAGTGGGTTTGTGAGAACTCTGTTCCAACAAATGAGGG  
CY010379 TACAGTGGGTTTGTGAGAACTCTGTTCCAACAAATGAGGG  
CY021044 TACAGTGGGTTTGTGAGAACTCTGTTCCAACAAATGAGGG  
CY032268 TACAGTGGATTTCGTTAGGACTCTATTTCAAACAAATGAGGG  
CY080530 TACAGTGGATTTCGTTAGGACTCTATTTCAAACAAATGAGGG  
CY087807 TACAGTGGGTTTGTGAGAACTCTATTTCAAACAAATGAGGG  
CY013278 TACAGTGGGTTTGTGAGAACTCTGTTCCAACAAATGAGAG  
CY009347 TACAGTGGGTTTGTGAGAACTCTGTTCCAACAAATGAGGG

1841

AJ404630 ATGTTTTGGGAACGTTGACACTGTTCAAATAATCAAACCT  
JX046923 ATGTGCTTGGGACATTTGACACTGTCCAAATAATAAAACT  
CY049984 ATGTGCTTGGGACATTTGACACTGTCCAAATAATAAAACT  
GQ132138.1| ATGTGCTTGGGACATTTGACACTGTCCAAATAATAAAACT  
CY006674 ATGTGCTCGGGACCTTTGACACAACTCAGATAATAAAACT  
DQ208309 ATGTGCTTGGGACATTTGACACCGTTTCAGATAATAAAACT  
CY118921 ATGTACTTGGGACATTTGACACCAACCCAGATAATAAAAGCT  
CY113372 ATGTACTTGGGACATTTGATACCAACCCAGATAATAAAAGCT  
CY112844 ATGTACTTGGGACATTTGATACCATCCAGATAATAAAAGCT  
CY020452 ATGTGCTTGGGACATTTGACACCGCACAGATAATAAAACT  
CY021964 ATGTGCTTGGGACATTTGATACCGCACAGATAATAAAACT  
CY009611 ATGTGCTTGGGACATTTGATACCGCTCAGATAATAAAACT  
CY045779 ATGTGCTTGGGACATTTGACACCGCTCAGATAATAAAACT  
CY010379 ATGTGCTTGGGACTTTTTCACACCAACCCAGATAATAAAACT  
CY021044 ATGTGCTTGGGACTTTTTCACACCAACCCAGATAATAAAACT  
CY032268 ATGTACTTGGGACATTTGATACCAACCCAGATAATAAAAGCT  
CY080530 ATGTACTTGGGACATTTGATACCAACCCAGATAATAAAAGCT  
CY087807 ATGTACTTGGGACATTTGATACCAACCCAGATAATAAAACT  
CY013278 ATGTGCTTGGGACATTTGACACCAACCCAAATAATAAAACT  
CY009347 ATGTACTTGGGACATTTGATACCAACCCAGATAATAAAACT

1881

AJ404630 ACTACCATTTGCAGCAGCCCCACCGGAACAGAGTAGGATG  
JX046923 TCTCCCCTTTGCTGCTGCTCCACCAGAACAGAGTAGGATG  
CY049984 TCTCCCCTTTGCTGCTGCTCCACCAGAACAGAGTAGGATG  
GQ132138.1| TCTCCCCTTTGCTGCTGCTCCACCAGAACAGAGTAGGATG  
CY006674 TCTTCCCTTTGCAGCCGCTCCACCAAAGCAAAGTAGAATG  
DQ208309 TCTTCCCTTTGCAGCCGCTCCACCAAAGCAAAGTAGAATG  
CY118921 TCTCCCCTTTGAGCCGCTCCACCAAAGCAAAGCAGAAATG  
CY113372 TCTCCCCTTTGAGCCGCTCCACCAAAGCAAAGCAGGATG  
CY112844 TCTCCCCTTTGAGCCGCTCCACCAAAGCAAAGCAGAAATG  
CY020452 TCTTCCCTTTGCAGCCGCTCCACCAAAGCAAAGTAGAATG  
CY021964 TCTTCCCTTTGCAGCCGCTCCACCAAAGCAAAGTAGAATG  
CY009611 TCTTCCCTTTGCAGCCGCTCCACCAAAGCAAAGTAGAATG  
CY045779 TCTTCCCTTTGCAGCCGCTCCACCAAAGCAAAGTAGAATG  
CY010379 TCTTCCCTTTGCAGCCGCTCCACCAAAGCAAAGTAGAATG  
CY021044 TCTTCCCTTTGCAGCCGCTCCACCAAAGCAAAGTAGAATG  
CY032268 TCTTCCCTTTGCAGCCGCCCCACCAAAGCAAAGTAGAATG  
CY080530 TCTCCCCTTTGAGCCGCCCCACCAAAGCAAAGCAGGATG  
CY087807 TCTTCCCTTTGCAGCCGCCCCACCAAAGCAAAGTAGAATG  
CY013278 TCTTCCCTTTGCAGCCGCTCCACCAAAGCAAAGTAGAATG  
CY009347 TCTTCCCTTTGCAGCCGCTCCACCAAAGCAAAGTAGAATG



1921

AJ404630  
JX046923  
CY049984  
GQ132138.1|  
CY006674  
DQ208309  
CY118921  
CY113372  
CY112844  
CY020452  
CY021964  
CY009611  
CY045779  
CY010379  
CY021044  
CY032268  
CY080530  
CY087807  
CY013278  
CY009347

1961

AJ404630  
JX046923  
CY049984  
GQ132138.1|  
CY006674  
DQ208309  
CY118921  
CY113372  
CY112844  
CY020452  
CY021964  
CY009611  
CY045779  
CY010379  
CY021044  
CY032268  
CY080530  
CY087807  
CY013278  
CY009347

2001

AJ404630  
JX046923  
CY049984  
GQ132138.1|  
CY006674  
DQ208309  
CY118921  
CY113372  
CY112844  
CY020452  
CY021964  
CY009611  
CY045779  
CY010379  
CY021044  
CY032268  
CY080530  
CY087807  
CY013278  
CY009347

2041

AJ404630 GCAGGTGCCTTACAGAGGACCCAGATGAAGGAACAGCAG  
JX046923 GCAGGTGCATTGACTGAAGATCCAGATGAAGGCACATCTG  
CY049984 GCAGGTGCATTGACTGAAGATCCAGATGAAGGCACATCTG  
GQ132138.1| GCAGGTGCATTGACTGAAGATCCAGATGAAGGCACATCTG  
CY006674 GCTGGCACTTTAACTGAAGACCCAGATGAAGGCACAGCTG  
DQ208309 GCAGGTGCCTTAACTGAAGACCCAGATGAAGGCACAGCTG  
CY118921 GCCGGCACTTTAATTGAAGACCCAGATGAAAGCACATCAG  
CY113372 GCTGGCACTTTAATTGAAGACCCAGATGAAAGCACATCCG  
CY112844 GCCGGCACTTTAATTGAAGACCCAGATGAAAGCACATCCG  
CY020452 GCTGGCACTTTAACTGAAGACCCAGATGAAGGCACAGCTG  
CY021964 GCTGGCACTTTAACTGAAGACCCAGATGAAGGCACAGCTG  
CY009611 GCTGGCACTTTAACTGAAGACCCAGATGAAGGCACAGCTG  
CY045779 GCTGGCACTTTAACTGAAGACCCAGATGAAGGCACAGATG  
CY010379 GCTGGCACTTTAACTGAAGACCCAGATGAAGGCACAGCTG  
CY021044 GCTGGCACTTTAACTGAAGACCCGGATGAAGGCACAGCTG  
CY032268 GCTGGCACTTTAATTGAAGACCCAGATGAAGGCACATCCG  
CY080530 GCTGGCACTTTAATTGAAGACCCAGATGAAGGTACATCCG  
CY087807 GCTGGCACTTTAACTGAAGACCCAGATGAAGGCACATCTG  
CY013278 GCTGGCACTTTAACTGAAGACCCAGATGAAGGCACAGCTG  
CY009347 GCTGGCACTTTAACTGAAGACCCAGATGAAGGCACAGCTG

2081

AJ404630 GAGTAGAGTCTGCAGTATTGAGAGGATTTCCTAATCCTCGG  
JX046923 GGGTGGAGTCTGCTGTCCGAGAGGATTTCCTCATTTTAGG  
CY049984 GGGTGGAGTCTGCTGTCCGAGAGGATTTCCTCATTTTAGG  
GQ132138.1| GGGTGGAGTCTGCTGTCCGAGAGGATTTCCTCATTTTAGG  
CY006674 GAGTGGAAATCTGCTGTTTAAAGGGGATTCCCTCATTTCTAGG  
DQ208309 GAGTGGAGTCTGCTGTTCTGAGAGGATTCCCTCATTTCTGGG  
CY118921 GAGTGGAGTCCGCGCTGCTGAGAGGGTTTCTCATTTATAGG  
CY113372 GAGTGGAGTCCGCTGCTGTTGAGAGGATTTCCTCATTTCTAGG  
CY112844 GAGTGGAGTCCGCTGCTGTTGAGAGGATTTCCTCATTTATAGG  
CY020452 GAGTGGAGTCCGCTGTTCTGAGGGGATTCCCTCATTTCTGGG  
CY021964 GAGTGGAGTCCGCTGTTCTGAGGGGATTCCCTCATTTCTGGG  
CY009611 GAGTGGAGTCCGAGTTCTGAGAGGATTCCCTCATTTCTGGG  
CY045779 GAGTGGAGTCCGAGTTCTGAGAGGATTCCCTCATTTCTGGG  
CY010379 GAGTGGAGTCCGCTGTTCTAAGGGGATTCCCTCATTTCTGGG  
CY021044 GAGTGGAAATCCGCTGTTCTAAGGGGATTCCCTCATTTCTGGG  
CY032268 GAAATGGAGTCCGCTGTTCTGAGAGGATTCCCTCATTTCTGGG  
CY080530 GAGTGGAGTCAAGTGTTCGAGAGGGTTCCCTCATTTCTGGG  
CY087807 GAGTGGAGTCCGCTGTTCTGAGAGGATTCCCTCATTTCTGGG  
CY013278 GAGTGGAGTCCGCTGTTCTGAGGGGATTCCCTCATTTCTGGG  
CY009347 GAGTGGAGTCCGCTGTTCTGAGAGGATTCCCTCATTTCTGGG

2121

AJ404630 CAAAGAAAGACAAAAGATATGGACCAGCATTAAAGCATCAAT  
JX046923 CAAAGAAAGACAAAGAGATATGGCCCAGCATTAAAGCATCAAT  
CY049984 CAAAGAAAGACAAAGAGATATGGCCCAGCATTAAAGCATCAAT  
GQ132138.1| CAAAGAAAGACAAAGAGATATGGCCCAGCATTAAAGCATCAAT  
CY006674 CAAAGAAAGATAGAAGATATGGGCCAGCATTAAAGCATCAAT  
DQ208309 CAAAGAAAGACAGGAGATATGGGCCAGCATTAAAGCATCAAT  
CY118921 TAAGGAAGACAGAAGATACGGACCAGCATTAAAGCATCAAT  
CY113372 TAAGGAAGACAGAAGATACGGACCAGCATTAAAGCATCAAT  
CY112844 TAAGGAAGACAGAAGATACGGACCAGCATTAAAGCATCAAT  
CY020452 CAAAGAAAGACAGGAGATATGGGCCAGCATTAAAGCATCAAT  
CY021964 CAAAGAAAGACAAAGAGATATGGGCCAGCACTAAAGCATCAAT  
CY009611 CAAAGAAAGACAGGAGATATGGAACCAGCATTAAAGCATAAAT  
CY045779 CAAAGAAAGACAGGAGATATGGGCCAGCATTAAACATCAAT  
CY010379 CAAAGAAAGATAGGAGATATGGGCCAGCATTAAAGCATCAAT  
CY021044 CAAAGAAAGATAGGAGATATGGGCCAGCATTAAAGCATCAAT  
CY032268 TAAGGAAGATAGAAGATATGGGCCAGCATTAAAGCATCAAT  
CY080530 TAAGGAAGATAGAAGATATGGAACCAGCATTAAAGCATCAAT  
CY087807 CAAAGAAAGATAGGAGATATGGAACCAGCATTAAAGCATCAAT  
CY013278 CAAAGAAAGATAGGAGATATGGAACCAGCATTAAAGCATCAAT  
CY009347 CAAAGAAAGATAGGAGATATGGGCCAGCATTAAAGCATCAAT

2161

AJ404630  
 JX046923  
 CY049984  
 GQ132138.1|  
 CY006674  
 DQ208309  
 CY118921  
 CY113372  
 CY112844  
 CY020452  
 CY021964  
 CY009611  
 CY045779  
 CY010379  
 CY021044  
 CY032268  
 CY080530  
 CY087807  
 CY013278  
 CY009347

2201

AJ404630  
 JX046923  
 CY049984  
 GQ132138.1|  
 CY006674  
 DQ208309  
 CY118921  
 CY113372  
 CY112844  
 CY020452  
 CY021964  
 CY009611  
 CY045779  
 CY010379  
 CY021044  
 CY032268  
 CY080530  
 CY087807  
 CY013278  
 CY009347

2241

AJ404630  
 JX046923  
 CY049984  
 GQ132138.1|  
 CY006674  
 DQ208309  
 CY118921  
 CY113372  
 CY112844  
 CY020452  
 CY021964  
 CY009611  
 CY045779  
 CY010379  
 CY021044  
 CY032268  
 CY080530  
 CY087807  
 CY013278  
 CY009347

2281

|            |                                            |
|------------|--------------------------------------------|
| AJ404630   | AAAAGAATTTCGGATGGCCATCAATTAGTGTGGAATTGTTT  |
| JX046923   | AAAAGAATTTCGGATGGCCATCAATTAG-----          |
| CY049984   | AAAAGAATTTCGGATGGCCATCAATTAG-----          |
| GQ132138.1 | AAAAGAATTTCGGATGGCCATCAATTAGTGTGGAATTGTTT  |
| CY006674   | AAAAGAATTTCGGATGGCCATCAATTAAATTTCGAATAAATT |
| DQ208309   | AAAAGAATTTCGGATGGCCATCAATTAG-----          |
| CY118921   | AAAAGAATTTCGGATGGCCATCAATTAAATGTTGAATAGTTT |
| CY113372   | AAAAGAATTTCGGATGGCCATCAATTAAATGTTGAATAGTTT |
| CY112844   | AAAAGAATTTCGGATGGCCATTAATTAAATGTTGAATAGTTT |
| CY020452   | AAAAGAATTTCGGATGGCCATCAATTAGTGTGGAATAG---  |
| CY021964   | AAAAGAATTTCGGATGGCCATCAATTAGTGTGGAATAG---  |
| CY009611   | AAAAGAATTTCGGATGGCCATCAATTAGTGTGGAATAGTTT  |
| CY045779   | AAAAGAATTTCGGATGGCCATCAATTAGTGTGGAATAGTTT  |
| CY010379   | AAAAGAATTTCGGATGGCCATCAATTAA-----          |
| CY021044   | AAAAGAATTTCGGATGGCCATCAATTAGTGTGGAATAAATT  |
| CY032268   | AAAAGAATTTCGGATGGCCATCAATTAAATGTTGAATAGTTT |
| CY080530   | AAAAGAATTTCGGATGGCCATCAATTAAATGTTGAATAGTTT |
| CY087807   | AAAAGAATTTCGGATGGCCATCAATTAAATGTTGAATAGTTT |
| CY013278   | AAAAGAATTTCGGATGGCCATCAATTAGTGTGGAATAGTTT  |
| CY009347   | AAAAGAATTTCGGATGGCCATCAATTAAATGTTGAATAGTTT |

2321

|            |                       |
|------------|-----------------------|
| AJ404630   | AAAAACGACCTTGTTCCTACT |
| JX046923   | -----                 |
| CY049984   | -----                 |
| GQ132138.1 | AA-----               |
| CY006674   | AAAAA-----            |
| DQ208309   | -----                 |
| CY118921   | AAAAACGAC-----        |
| CY113372   | AAAAACG-----          |
| CY112844   | AAAAACGAC-----        |
| CY020452   | -----                 |
| CY021964   | -----                 |
| CY009611   | AAAAA-----            |
| CY045779   | AAAAACA-----          |
| CY010379   | -----                 |
| CY021044   | A-----                |
| CY032268   | AAAAA-----            |
| CY080530   | AAAAACGA-----         |
| CY087807   | AAAAAC-----           |
| CY013278   | AA-----               |
| CY009347   | AAAAA-----            |
