# Supplementary material
Source: MDPI journal article supplement (https://www.mdpi.com/1099-4300/15/8/3065)
Supplement: s1 [file s1]

|                                                                  |    |                              |
|------------------------------------------------------------------|----|------------------------------|
| AJ404629_H9N2_A/Hong_Kong/1073/99_Hong_Kong_6_(NA)               | 1  | -----ATGAATCCAAATCAAA        |
| CY087802_H2N2_A/Japan/305-MA12/1957_Japan_6_(NA)                 |    | --AGTGAAAAATGAATCCAAATCAAA   |
| CY032263_H2N2_A/Cottbus/1/1964_Germany_6_(NA)                    |    | -----ATGAATCCAAATCAAA        |
| CY080525_H3N2_A/Hong_Kong/1-10-MA21-1/1968_Hong_Kong_6_(NA)      |    | --AGTGAAAAATGAATCCAAATCAAA   |
| CY118916_H3N2_A/Malaysia/1665090/2006_Malaysia_6_(NA)            |    | -----AAGATGAATCCAAATCAAA     |
| CY113367_H3N2_A/Shanghai/11/1987_China_6_(NA)                    |    | -----AAGATGAATCCAAATCAAA     |
| CY112839_H3N2_A/Hong_Kong/1/1997_Hong_Kong_6_(NA)                |    | -----AGATGAATCCAAATCAAA      |
| JX046928_H1N1_A/Moscow/IIV-45/2012_Russia_6_(NA)                 |    | -----ATGAATCCAAACCAAA        |
| CY049989_H1N1_A/Mexico_City/WR1087T/2009_Mexico_6_(NA)           |    | -----ATGAATCCAAACCAAA        |
| GQ132138.1 _H1N1_A/Mexico/IndRE4114/2009                         |    | -----TTAAAAATGAATCCAAACCAAA  |
| CY021959_H1N1_A/New_Jersey/1976_USA_6_(NA)                       |    | GAGTTTAAAAATGAATACAAATCAAA   |
| AF250356_H1N1_A/Brevig_Mission/1/1918_USA_6_(NA)                 |    | -----ATGAATCCAAATCAAA        |
| CY013273_H1N1_A/Hickox/1940_USA_6_(NA)                           |    | -----AATGAATCCAAATCAGA       |
| CY009606_H1N1_A/Wilson-Smith/1933_United_Kingdom_6_(NA)          |    | ----TTTTAAATGAATCCAAACCAAA   |
| CY045774_H1N1_A/Melbourne/1/1946_Australia_6_(NA)                |    | -----ATGAATCCAAATCAGA        |
| CY020447_H1N1_A/Henry/1936_USA_6_(NA)                            |    | -----ATGAATCCAAATCAGA        |
| CY006669_H1N1_A/New_York/493/2003_USA_6_(NA)                     |    | GAGTTTAAAAATGAATCCAAATCAAA   |
| CY009342_H1N1_A/Malaysia/1954_Malaysia_6_(NA)                    |    | -----ATGAATCCAAATCAGA        |
| CY010374_H1N1_A/USSR/90/1977_Russia_6_(NA)                       |    | GAGTTTAAAAATGAATCCAAATCAGA   |
| CY021039_H1N1_A/Christ's_Hospital/157/1982_United_Kingdom_6_(NA) |    | ---TTTTAAAAATGAATCCAAATCAGA  |
|                                                                  |    |                              |
| AJ404629_H9N2_A/Hong_Kong/1073/99_Hong_Kong_6_(NA)               | 26 | AGATAATAGCACITGGCTCTGTTTC    |
| CY087802_H2N2_A/Japan/305-MA12/1957_Japan_6_(NA)                 |    | AGACAATAACAATTTGGCTCTGTCTC   |
| CY032263_H2N2_A/Cottbus/1/1964_Germany_6_(NA)                    |    | AGATAATAACAATTTGGCTCTGTCTC   |
| CY080525_H3N2_A/Hong_Kong/1-10-MA21-1/1968_Hong_Kong_6_(NA)      |    | AGATAATAACAATTTGGCTCTGTCTC   |
| CY118916_H3N2_A/Malaysia/1665090/2006_Malaysia_6_(NA)            |    | AGATAATAACGATTTGGCTCTGTTTC   |
| CY113367_H3N2_A/Shanghai/11/1987_China_6_(NA)                    |    | AGATAATAACAATTTGGCTCTGTTTC   |
| CY112839_H3N2_A/Hong_Kong/1/1997_Hong_Kong_6_(NA)                |    | AGATAATAACAATTTGGCTCTGTTTC   |
| JX046928_H1N1_A/Moscow/IIV-45/2012_Russia_6_(NA)                 |    | AGATAATAACCAATTTGGTTCCGCTCTG |
| CY049989_H1N1_A/Mexico_City/WR1087T/2009_Mexico_6_(NA)           |    | AGATAATAACCAATTTGGTTCCGCTCTG |
| GQ132138.1 _H1N1_A/Mexico/IndRE4114/2009                         |    | AGATAATAACCAATTTGGTTCCGCTCTG |
| CY021959_H1N1_A/New_Jersey/1976_USA_6_(NA)                       |    | GAATAATAACCAATTTGGGACAATCTG  |
| AF250356_H1N1_A/Brevig_Mission/1/1918_USA_6_(NA)                 |    | AAATAATAACCAATTTGGGTCAATCTG  |
| CY013273_H1N1_A/Hickox/1940_USA_6_(NA)                           |    | AAATAATAACCAATTTGGATCAATCTG  |
| CY009606_H1N1_A/Wilson-Smith/1933_United_Kingdom_6_(NA)          |    | AAATAATAACCAATTTGGGTCAATCTG  |
| CY045774_H1N1_A/Melbourne/1/1946_Australia_6_(NA)                |    | AAATAATAACCAATTTGGGTCAATCTG  |
| CY020447_H1N1_A/Henry/1936_USA_6_(NA)                            |    | AAATAATAACCAATTTGGATCAATCTG  |
| CY006669_H1N1_A/New_York/493/2003_USA_6_(NA)                     |    | AAATAATAACCAATTTGGATCAATCAG  |
| CY009342_H1N1_A/Malaysia/1954_Malaysia_6_(NA)                    |    | AAATAATAACCAATTTGGATCAATCTG  |
| CY010374_H1N1_A/USSR/90/1977_Russia_6_(NA)                       |    | AAATAATAACCAATTTGGATCAATCTG  |
| CY021039_H1N1_A/Christ's_Hospital/157/1982_United_Kingdom_6_(NA) |    | AAATAATAACCAATTTGGATCGATCTG  |
|                                                                  |    |                              |
| AJ404629_H9N2_A/Hong_Kong/1073/99_Hong_Kong_6_(NA)               | 51 | TATAACTATTGCGACAATATGTTTA    |
| CY087802_H2N2_A/Japan/305-MA12/1957_Japan_6_(NA)                 |    | TCTCACCATTGAAACAGTATGCTTC    |
| CY032263_H2N2_A/Cottbus/1/1964_Germany_6_(NA)                    |    | TCTCACCATTGCAACAGCATGCTTC    |
| CY080525_H3N2_A/Hong_Kong/1-10-MA21-1/1968_Hong_Kong_6_(NA)      |    | TCTCACCATTGCAACAGTATGCTTC    |
| CY118916_H3N2_A/Malaysia/1665090/2006_Malaysia_6_(NA)            |    | TCTCACCATTGCCACAATATGCTTC    |
| CY113367_H3N2_A/Shanghai/11/1987_China_6_(NA)                    |    | TCTCACTATTGCCACAATATGCTTT    |
| CY112839_H3N2_A/Hong_Kong/1/1997_Hong_Kong_6_(NA)                |    | TCTCACTATTACCACAATATGCTTC    |
| JX046928_H1N1_A/Moscow/IIV-45/2012_Russia_6_(NA)                 |    | TATGACAATTGGAATAGCTAAGCTTA   |
| CY049989_H1N1_A/Mexico_City/WR1087T/2009_Mexico_6_(NA)           |    | TATGACAATTGGAATGGCTAAGCTTA   |
| GQ132138.1 _H1N1_A/Mexico/IndRE4114/2009                         |    | TATGACAATTGGAATGGCTAAGCTTA   |
| CY021959_H1N1_A/New_Jersey/1976_USA_6_(NA)                       |    | TCTAATAGTTTGGGAATAATTAGTCTA  |
| AF250356_H1N1_A/Brevig_Mission/1/1918_USA_6_(NA)                 |    | TATGGTAGTCGGAATAATTAGCCTA    |
| CY013273_H1N1_A/Hickox/1940_USA_6_(NA)                           |    | TATGGTAGTCGGAATAATTAGCCTA    |
| CY009606_H1N1_A/Wilson-Smith/1933_United_Kingdom_6_(NA)          |    | TATGGTAGTCGGAATAATTAGCCTA    |
| CY045774_H1N1_A/Melbourne/1/1946_Australia_6_(NA)                |    | TATGGTAGTCGGAATAATTAGCCTA    |
| CY020447_H1N1_A/Henry/1936_USA_6_(NA)                            |    | TATGGTAGTCGGAATAATTAGCCTA    |
| CY006669_H1N1_A/New_York/493/2003_USA_6_(NA)                     |    | TATGACAATCGGAATAATTAGTCTA    |
| CY009342_H1N1_A/Malaysia/1954_Malaysia_6_(NA)                    |    | TATGACAATCGGAACAATTAGTCTA    |
| CY010374_H1N1_A/USSR/90/1977_Russia_6_(NA)                       |    | TATGGCAATCGGAATAATTAGTCTA    |
| CY021039_H1N1_A/Christ's_Hospital/157/1982_United_Kingdom_6_(NA) |    | TATGACAATCGGAATAATTAGTCTA    |

AJ404629\_H9N2\_A/Hong\_Kong/1073/99\_Hong\_Kong\_6\_(NA)  
CY087802\_H2N2\_A/Japan/305-MA12/1957\_Japan\_6\_(NA)  
CY032263\_H2N2\_A/Cottbus/1/1964\_Germany\_6\_(NA)  
CY080525\_H3N2\_A/Hong\_Kong/1-10-MA21-1/1968\_Hong\_Kong\_6\_(NA)  
CY118916\_H3N2\_A/Malaysia/1665090/2006\_Malaysia\_6\_(NA)  
CY113367\_H3N2\_A/Shanghai/11/1987\_China\_6\_(NA)  
CY112839\_H3N2\_A/Hong\_Kong/1/1997\_Hong\_Kong\_6\_(NA)  
JX046928\_H1N1\_A/Moscow/IIV-45/2012\_Russia\_6\_(NA)  
CY049989\_H1N1\_A/Mexico\_City/WR1087T/2009\_Mexico\_6\_(NA)  
GQ132138.1|\_H1N1\_A/Mexico/InDRE4114/2009  
CY021959\_H1N1\_A/New\_Jersey/1976\_USA\_6\_(NA)  
AF250356\_H1N1\_A/Brevig\_Mission/1/1918\_USA\_6\_(NA)  
CY013273\_H1N1\_A/Hickox/1940\_USA\_6\_(NA)  
CY009606\_H1N1\_A/Wilson-Smith/1933\_United\_Kingdom\_6\_(NA)  
CY045774\_H1N1\_A/Melbourne/1/1946\_Australia\_6\_(NA)  
CY020447\_H1N1\_A/Henry/1936\_USA\_6\_(NA)  
CY006669\_H1N1\_A/New\_York/493/2003\_USA\_6\_(NA)  
CY009342\_H1N1\_A/Malaysia/1954\_Malaysia\_6\_(NA)  
CY010374\_H1N1\_A/USSR/90/1977\_Russia\_6\_(NA)  
CY021039\_H1N1\_A/Christ's\_Hospital/157/1982\_United\_Kingdom\_6\_(NA)

CTCATGCAGAT-----TGCCATCT  
CTCATGCAGAT-----TGCCATCC  
CTCATGCAGAT-----TGCCATCC  
CTCATGCAGAT-----TGCCATCT  
TTCATGCAAAAT-----TGCCATCT  
CTTATGCAAAAT-----TGCCATCC  
CTTATGCAAAAT-----TGCCATCC  
ATATTACAAATTTGAAACATAATCT  
ATATTACAAATTTGAAACATAATCT  
ATATTACAAATTTGAAACATAATCT  
TTATTGCAGATAGGAAATATAATCT  
ATATTGCAAAATAGGGAATATAATCT  
ATATTGCAAAATAGGGAATATTGTCT  
ATATTGCAAAATAGGGAATATAATCT  
ATATTGCAAAATAGGGAATATAATCT  
ATATTGCAAAATAGGGAATATAATCT  
ATATTGCAAAATAGGGAATATAATCT  
ATGTTGCAAAATAGGAAATATTATT  
ATATTGCAAAATAGGGAATATTATCT  
ATATTGCAAAATAGGGAATATTATCT  
ATATTGCAAAATAGGAAATATTATT

AJ404629\_H9N2\_A/Hong\_Kong/1073/99\_Hong\_Kong\_6\_(NA)  
CY087802\_H2N2\_A/Japan/305-MA12/1957\_Japan\_6\_(NA)  
CY032263\_H2N2\_A/Cottbus/1/1964\_Germany\_6\_(NA)  
CY080525\_H3N2\_A/Hong\_Kong/1-10-MA21-1/1968\_Hong\_Kong\_6\_(NA)  
CY118916\_H3N2\_A/Malaysia/1665090/2006\_Malaysia\_6\_(NA)  
CY113367\_H3N2\_A/Shanghai/11/1987\_China\_6\_(NA)  
CY112839\_H3N2\_A/Hong\_Kong/1/1997\_Hong\_Kong\_6\_(NA)  
JX046928\_H1N1\_A/Moscow/IIV-45/2012\_Russia\_6\_(NA)  
CY049989\_H1N1\_A/Mexico\_City/WR1087T/2009\_Mexico\_6\_(NA)  
GQ132138.1|\_H1N1\_A/Mexico/InDRE4114/2009  
CY021959\_H1N1\_A/New\_Jersey/1976\_USA\_6\_(NA)  
AF250356\_H1N1\_A/Brevig\_Mission/1/1918\_USA\_6\_(NA)  
CY013273\_H1N1\_A/Hickox/1940\_USA\_6\_(NA)  
CY009606\_H1N1\_A/Wilson-Smith/1933\_United\_Kingdom\_6\_(NA)  
CY045774\_H1N1\_A/Melbourne/1/1946\_Australia\_6\_(NA)  
CY020447\_H1N1\_A/Henry/1936\_USA\_6\_(NA)  
CY006669\_H1N1\_A/New\_York/493/2003\_USA\_6\_(NA)  
CY009342\_H1N1\_A/Malaysia/1954\_Malaysia\_6\_(NA)  
CY010374\_H1N1\_A/USSR/90/1977\_Russia\_6\_(NA)  
CY021039\_H1N1\_A/Christ's\_Hospital/157/1982\_United\_Kingdom\_6\_(NA)

AJ404629\_H9N2\_A/Hong\_Kong/1073/99\_Hong\_Kong\_6\_(NA)  
CY087802\_H2N2\_A/Japan/305-MA12/1957\_Japan\_6\_(NA)  
CY032263\_H2N2\_A/Cottbus/1/1964\_Germany\_6\_(NA)  
CY080525\_H3N2\_A/Hong\_Kong/1-10-MA21-1/1968\_Hong\_Kong\_6\_(NA)  
CY118916\_H3N2\_A/Malaysia/1665090/2006\_Malaysia\_6\_(NA)  
CY113367\_H3N2\_A/Shanghai/11/1987\_China\_6\_(NA)  
CY112839\_H3N2\_A/Hong\_Kong/1/1997\_Hong\_Kong\_6\_(NA)  
JX046928\_H1N1\_A/Moscow/IIV-45/2012\_Russia\_6\_(NA)  
CY049989\_H1N1\_A/Mexico\_City/WR1087T/2009\_Mexico\_6\_(NA)  
GQ132138.1|\_H1N1\_A/Mexico/InDRE4114/2009  
CY021959\_H1N1\_A/New\_Jersey/1976\_USA\_6\_(NA)  
AF250356\_H1N1\_A/Brevig\_Mission/1/1918\_USA\_6\_(NA)  
CY013273\_H1N1\_A/Hickox/1940\_USA\_6\_(NA)  
CY009606\_H1N1\_A/Wilson-Smith/1933\_United\_Kingdom\_6\_(NA)  
CY045774\_H1N1\_A/Melbourne/1/1946\_Australia\_6\_(NA)  
CY020447\_H1N1\_A/Henry/1936\_USA\_6\_(NA)  
CY006669\_H1N1\_A/New\_York/493/2003\_USA\_6\_(NA)  
CY009342\_H1N1\_A/Malaysia/1954\_Malaysia\_6\_(NA)  
CY010374\_H1N1\_A/USSR/90/1977\_Russia\_6\_(NA)  
CY021039\_H1N1\_A/Christ's\_Hospital/157/1982\_United\_Kingdom\_6\_(NA)

CAA --- TGAATGTACCAACCCATC  
 TAAGCAACATGAGTGC GACTCCCCC  
 TAAGCAACATGAGTGC GACTCCCCC  
 TAAGCAATATGAGTGC GACTCCCCC  
 CAAGCAATATGAATTCAACTCCCCC  
 CAAGCAATATGAGTGC GACTCCCCC  
 CAAGCAATGTGAATGCAACTCCCCC  
 CAACT--TGGGAATCAAAATCAGAT  
 CAACT--TGGGAATCAAAATCAGAT  
 CAACT--TGGGAATCAAAATCAGAT  
 CAGAC--TGGGAGAAAAAGCCATCC  
 CAAAC--TGGGAATCAAAACCATCC  
 CAAAC--TGGAAATCAAAACCATAC  
 CAAAC--CGGAAATCAAAACCATAC  
 CAAGC--TGGGAGT-----  
 CAAAC--TGGGAAGTCAAAACCATAC  
 CAAAC--TGGGAAGTCAAAACCATAC  
 CAAAC--TGGGAAGTCAAAACCATAC  
 CAAAC--TGGGAAGTCAAAACCATAC  
 CAAAC--TGGGAAGTCAAAACCATAC

AJ404629\_H9N2\_A/Hong\_Kong/1073/99\_Hong\_Kong\_6\_(NA)  
 CY087802\_H2N2\_A/Japan/305-MA12/1957\_Japan\_6\_(NA)  
 CY032263\_H2N2\_A/Cottbus/1/1964\_Germany\_6\_(NA)  
 CY080525\_H3N2\_A/Hong\_Kong/1-10-MA21-1/1968\_Hong\_Kong\_6\_(NA)  
 CY118916\_H3N2\_A/Malaysia/1665090/2006\_Malaysia\_6\_(NA)  
 CY113367\_H3N2\_A/Shanghai/11/1987\_China\_6\_(NA)  
 CY112839\_H3N2\_A/Hong\_Kong/1/1997\_Hong\_Kong\_6\_(NA)  
 JX046928\_H1N1\_A/Moscow/IIV-45/2012\_Russia\_6\_(NA)  
 CY049989\_H1N1\_A/Mexico\_City/WR1087T/2009\_Mexico\_6\_(NA)  
 GQ132138.1|\_H1N1\_A/Mexico/InDRE4114/2009  
 CY021959\_H1N1\_A/New\_Jersey/1976\_USA\_6\_(NA)  
 AF250356\_H1N1\_A/Brevig\_Mission/1/1918\_USA\_6\_(NA)  
 CY013273\_H1N1\_A/Hickox/1940\_USA\_6\_(NA)  
 CY009606\_H1N1\_A/Wilson-Smith/1933\_United\_Kingdom\_6\_(NA)  
 CY045774\_H1N1\_A/Melbourne/1/1946\_Australia\_6\_(NA)  
 CY020447\_H1N1\_A/Henry/1936\_USA\_6\_(NA)  
 CY006669\_H1N1\_A/New\_York/493/2003\_USA\_6\_(NA)  
 CY009342\_H1N1\_A/Malaysia/1954\_Malaysia\_6\_(NA)  
 CY010374\_H1N1\_A/USSR/90/1977\_Russia\_6\_(NA)  
 CY021039\_H1N1\_A/Christ's\_Hospital/157/1982\_United\_Kingdom\_6\_(NA)

151

```
--GAACAATCAAGCAGTGCCATGTG
GCGAGCAACCAAGTAATGCCATGTG
GCGAGCAACCAAGTAATGCCGTGTG
GCGAGCAACCAAGTAATGCCGTGTG
CCAAACAACCAAGTATGCTGTGTG
CCAAACAACCAAGTATGCTGTGTG
CCAAACAACCAAGTATGCTGTGTG
TGAAACATGCAATCAAAGCGTCATT
TGAAACATGCAATCAAAGCGTCATT
TAAGGTATGCAACCAAGTGTTCATT
TGAAACATGCAACCAAGCATCATT
TGGAACCTTGCAACCAAGCATCATT
TGGAATATGCAACCAAGGCATCATT

TGGAATATGCAACCAAAACATCATT
TGGAATATGCAACCAAGGAATCATC
TGGAATATGCAACCAAGGAATCATT
AGGAATATGCAACCAAGGAATCATT
TGGAATATGCAACCAAGGAATCATT
```

AJ404629\_H9N2\_A/Hong\_Kong/1073/99\_Hong\_Kong\_6\_(NA)  
 CY087802\_H2N2\_A/Japan/305-MA12/1957\_Japan\_6\_(NA)  
 CY032263\_H2N2\_A/Cottbus/1/1964\_Germany\_6\_(NA)  
 CY080525\_H3N2\_A/Hong\_Kong/1-10-MA21-1/1968\_Hong\_Kong\_6\_(NA)  
 CY118916\_H3N2\_A/Malaysia/1665090/2006\_Malaysia\_6\_(NA)  
 CY113367\_H3N2\_A/Shanghai/11/1987\_China\_6\_(NA)  
 CY112839\_H3N2\_A/Hong\_Kong/1/1997\_Hong\_Kong\_6\_(NA)  
 JX046928\_H1N1\_A/Moscow/IIV-45/2012\_Russia\_6\_(NA)  
 CY049989\_H1N1\_A/Mexico\_City/WR1087T/2009\_Mexico\_6\_(NA)  
 GQ132138.1|\_H1N1\_A/Mexico/InDRE4114/2009  
 CY021959\_H1N1\_A/New\_Jersey/1976\_USA\_6\_(NA)  
 AF250356\_H1N1\_A/Brevig\_Mission/1/1918\_USA\_6\_(NA)  
 CY013273\_H1N1\_A/Hickox/1940\_USA\_6\_(NA)  
 CY009606\_H1N1\_A/Wilson-Smith/1933\_United\_Kingdom\_6\_(NA)  
 CY045774\_H1N1\_A/Melbourne/1/1946\_Australia\_6\_(NA)  
 CY020447\_H1N1\_A/Henry/1936\_USA\_6\_(NA)  
 CY006669\_H1N1\_A/New\_York/493/2003\_USA\_6\_(NA)  
 CY009342\_H1N1\_A/Malaysia/1954\_Malaysia\_6\_(NA)  
 CY010374\_H1N1\_A/USSR/90/1977\_Russia\_6\_(NA)  
 CY021039\_H1N1\_A/Christ's\_Hospital/157/1982\_United\_Kingdom\_6\_(NA)

176

```
AACCAATCATAATAGAAAGGAACAT
AACCAATAATAATAGAAAGGAACAT
AACCAATAATAATAGAAAGGAACAT
AACCAATAATAATAGAAAGGAACAT
AACCAACAATAATAGAAAAAACAT
AACCAACAATAATAGAAAGAACAT
AACCAACAATAATAGAAAGAACAT
ACTTATGAAAAAACACTTGGGTAA
ACTTATGAAAAAACACTTGGGTAA
ACTTATGAAAAAACACTTGGGTAA
ACCTATGAAAAAACACATGGGTGA
ACCTATGAAAAAACAACCTGGGTGA
ACCTATAAAAAATAGCACCTGGGTAA
ACCTA-----AGCACCTGGGTGA
ACCTATAAAAAATAGCACCTGGGTAA
ACATATGAAAAACAGCACCTGGGTGA
ACCTATGAAAAAACAACCTGGGTAA
ACCTATGAAAAAATAGCACCTGGGTAA
ACCTATGAAAAATAGCACCTGGGTAA
```

AJ404629\_H9N2\_A/Hong\_Kong/1073/99\_Hong\_Kong\_6\_(NA)  
 CY087802\_H2N2\_A/Japan/305-MA12/1957\_Japan\_6\_(NA)  
 CY032263\_H2N2\_A/Cottbus/1/1964\_Germany\_6\_(NA)  
 CY080525\_H3N2\_A/Hong\_Kong/1-10-MA21-1/1968\_Hong\_Kong\_6\_(NA)  
 CY118916\_H3N2\_A/Malaysia/1665090/2006\_Malaysia\_6\_(NA)  
 CY113367\_H3N2\_A/Shanghai/11/1987\_China\_6\_(NA)  
 CY112839\_H3N2\_A/Hong\_Kong/1/1997\_Hong\_Kong\_6\_(NA)  
 JX046928\_H1N1\_A/Moscow/IIV-45/2012\_Russia\_6\_(NA)  
 CY049989\_H1N1\_A/Mexico\_City/WR1087T/2009\_Mexico\_6\_(NA)  
 GQ132138.1|\_H1N1\_A/Mexico/InDRE4114/2009  
 CY021959\_H1N1\_A/New\_Jersey/1976\_USA\_6\_(NA)  
 AF250356\_H1N1\_A/Brevig\_Mission/1/1918\_USA\_6\_(NA)  
 CY013273\_H1N1\_A/Hickox/1940\_USA\_6\_(NA)  
 CY009606\_H1N1\_A/Wilson-Smith/1933\_United\_Kingdom\_6\_(NA)  
 CY045774\_H1N1\_A/Melbourne/1/1946\_Australia\_6\_(NA)  
 CY020447\_H1N1\_A/Henry/1936\_USA\_6\_(NA)  
 CY006669\_H1N1\_A/New\_York/493/2003\_USA\_6\_(NA)  
 CY009342\_H1N1\_A/Malaysia/1954\_Malaysia\_6\_(NA)  
 CY010374\_H1N1\_A/USSR/90/1977\_Russia\_6\_(NA)  
 CY021039\_H1N1\_A/Christ's\_Hospital/157/1982\_United\_Kingdom\_6\_(NA)

201

```
AACAGAGATA-GTGCATTTGAATAA
AACAGAGATA-GTGTATTTGAATAA
AACAGAGATA-GTGTATTTGAATAA
AACAGAGATA-GTGTATTTGAATAA
AACAGAGATA-GTGTATCTGACCAA
AACAGAGATA-GTGTATCTGACCAA
ATCAGACATATGTTAACATCAGCAA
ATCAGACATATGTTAACATCAGCAA
ACCAGACTTATGTTAACATTAGCAA
ATCAAACATATGTTAACATTAGCAA
ATCAGACATATGTTAATATTAGCAA
ATCAAACATATGTTAATATTAGCAA
ATCAGACATATGTTAATATTAGCAA
ATCAAACATATGTTAATATTAGCAA
ATCAAACATATGTTAATATTAGCAA
ATCAAACATATGTTAATATTAGCAA
ATCAAACATATGTTAATATTAGCAA
```

AJ404629\_H9N2\_A/Hong\_Kong/1073/99\_Hong\_Kong\_6\_(NA)  
CY087802\_H2N2\_A/Japan/305-MA12/1957\_Japan\_6\_(NA)  
CY032263\_H2N2\_A/Cottbus/1/1964\_Germany\_6\_(NA)  
CY080525\_H3N2\_A/Hong\_Kong/1-10-MA21-1/1968\_Hong\_Kong\_6\_(NA)  
CY118916\_H3N2\_A/Malaysia/1665090/2006\_Malaysia\_6\_(NA)  
CY113367\_H3N2\_A/Shanghai/11/1987\_China\_6\_(NA)  
CY112839\_H3N2\_A/Hong\_Kong/1/1997\_Hong\_Kong\_6\_(NA)  
JX046928\_H1N1\_A/Moscow/IIV-45/2012\_Russia\_6\_(NA)  
CY049989\_H1N1\_A/Mexico\_City/WR1087T/2009\_Mexico\_6\_(NA)  
GQ132138.1|\_H1N1\_A/Mexico/InDRE4114/2009  
CY021959\_H1N1\_A/New\_Jersey/1976\_USA\_6\_(NA)  
AF250356\_H1N1\_A/Brevig\_Mission/1/1918\_USA\_6\_(NA)  
CY013273\_H1N1\_A/Hickox/1940\_USA\_6\_(NA)  
CY009606\_H1N1\_A/Wilson-Smith/1933\_United\_Kingdom\_6\_(NA)  
CY045774\_H1N1\_A/Melbourne/1/1946\_Australia\_6\_(NA)  
CY020447\_H1N1\_A/Henry/1936\_USA\_6\_(NA)  
CY006669\_H1N1\_A/New\_York/493/2003\_USA\_6\_(NA)  
CY009342\_H1N1\_A/Malaysia/1954\_Malaysia\_6\_(NA)  
CY010374\_H1N1\_A/USSR/90/1977\_Russia\_6\_(NA)  
CY021039\_H1N1\_A/Christ's\_Hospital/157/1982\_United\_Kingdom\_6\_(NA)

[illegible]

AJ404629\_H9N2\_A/Hong\_Kong/1073/99\_Hong\_Kong\_6\_(NA)  
CY087802\_H2N2\_A/Japan/305-MA12/1957\_Japan\_6\_(NA)  
CY032263\_H2N2\_A/Cottbus/1/1964\_Germany\_6\_(NA)  
CY080525\_H3N2\_A/Hong\_Kong/1-10-MA21-1/1968\_Hong\_Kong\_6\_(NA)  
CY118916\_H3N2\_A/Malaysia/1665090/2006\_Malaysia\_6\_(NA)  
CY113367\_H3N2\_A/Shanghai/11/1987\_China\_6\_(NA)  
CY112839\_H3N2\_A/Hong\_Kong/1/1997\_Hong\_Kong\_6\_(NA)  
JX046928\_H1N1\_A/Moscow/IIV-45/2012\_Russia\_6\_(NA)  
CY049989\_H1N1\_A/Mexico\_City/WR1087T/2009\_Mexico\_6\_(NA)  
GQ132138.1|\_H1N1\_A/Mexico/InDRE4114/2009  
CY021959\_H1N1\_A/New\_Jersey/1976\_USA\_6\_(NA)  
AF250356\_H1N1\_A/Brevig\_Mission/1/1918\_USA\_6\_(NA)  
CY013273\_H1N1\_A/Hickox/1940\_USA\_6\_(NA)  
CY009606\_H1N1\_A/Wilson-Smith/1933\_United\_Kingdom\_6\_(NA)  
CY045774\_H1N1\_A/Melbourne/1/1946\_Australia\_6\_(NA)  
CY020447\_H1N1\_A/Henry/1936\_USA\_6\_(NA)  
CY006669\_H1N1\_A/New\_York/493/2003\_USA\_6\_(NA)  
CY009342\_H1N1\_A/Malaysia/1954\_Malaysia\_6\_(NA)  
CY010374\_H1N1\_A/USSR/90/1977\_Russia\_6\_(NA)  
CY021039\_H1N1\_A/Christ's\_Hospital/157/1982\_United\_Kingdom\_6\_(NA)

GAAAGTTGTCCTAAAGTAGCAGAAT  
 GAGATTTGCCCGAAGTAGTGAAT  
 GAGATCTGCCCGAAAGTAGTGAAT  
 GAGATATGCCCGAAAGTAGTGAAT  
 GAAATATGCCCGAAACTAGCAGAAT  
 GAGATATGCCCGAAACTAGTGAAT  
 GAAATATGCCCGAAACTAGCAGAAT  
 GTGGTTTCCGTGAAATTAGC-----  
 GTGGTTTCCGTGAAATTAGC-----  
 GTGGTTTCCGTGAAATTAGC-----  
 GTGACTCCAATAACTAGC-----  
 GCAACTTCAGTGATATTAAAC-----  
 ACAACTTCAGTGATATTAGC-----  
 TCAACTTCAGTGATATTAAAC-----  
 GCAACTTCAGTGATATTAAAC-----  
 ACAACTTCAGTGATATTAAAC-----  
 AAAACTTCAGTGACATTGGC-----  
 ACAACTTCAATGATATTAGC-----  
 ACAACTTCAATGATATTAGC-----  
 ACAACTTCAGTGACATTAGC-----

AJ404629\_H9N2\_A/Hong\_Kong/1073/99\_Hong\_Kong\_6\_(NA)  
CY087802\_H2N2\_A/Japan/305-MA12/1957\_Japan\_6\_(NA)  
CY032263\_H2N2\_A/Cottbus/1/1964\_Germany\_6\_(NA)  
CY080525\_H3N2\_A/Hong\_Kong/1-10-MA21-1/1968\_Hong\_Kong\_6\_(NA)  
CY118916\_H3N2\_A/Malaysia/1665090/2006\_Malaysia\_6\_(NA)  
CY113367\_H3N2\_A/Shanghai/11/1987\_China\_6\_(NA)  
CY112839\_H3N2\_A/Hong\_Kong/1/1997\_Hong\_Kong\_6\_(NA)  
JX046928\_H1N1\_A/Moscow/IIV-45/2012\_Russia\_6\_(NA)  
CY049989\_H1N1\_A/Mexico\_City/WR1087T/2009\_Mexico\_6\_(NA)  
GQ132138.1|\_H1N1\_A/Mexico/InDRE4114/2009  
CY021959\_H1N1\_A/New\_Jersey/1976\_USA\_6\_(NA)  
AF250356\_H1N1\_A/Brevig\_Mission/1/1918\_USA\_6\_(NA)  
CY013273\_H1N1\_A/Hickox/1940\_USA\_6\_(NA)  
CY009606\_H1N1\_A/Wilson-Smith/1933\_United\_Kingdom\_6\_(NA)  
CY045774\_H1N1\_A/Melbourne/1/1946\_Australia\_6\_(NA)  
CY020447\_H1N1\_A/Henry/1936\_USA\_6\_(NA)  
CY006669\_H1N1\_A/New\_York/493/2003\_USA\_6\_(NA)  
CY009342\_H1N1\_A/Malaysia/1954\_Malaysia\_6\_(NA)  
CY010374\_H1N1\_A/USSR/90/1977\_Russia\_6\_(NA)  
CY021039\_H1N1\_A/Christ's\_Hospital/157/1982\_United\_Kingdom\_6\_(NA)

Sequence logo for the 10bp motif. The logo shows the conservation of nucleotides at each position. The top sequence is ACAAGAAATTGGTCAAAAGCCGCAATG. The logo indicates that positions 1-4 (ACAAG) and positions 9-10 (CAAT) are highly conserved, while positions 5-8 (AATTGGTCAA) show more variability. The bottom sequence is GGGCAATTTCCTCTCTCTG.

301

AJ404629\_H9N2\_A/Hong\_Kong/1073/99\_Hong\_Kong\_6\_(NA)  
 CY087802\_H2N2\_A/Japan/305-MA12/1957\_Japan\_6\_(NA)  
 CY032263\_H2N2\_A/Cottbus/1/1964\_Germany\_6\_(NA)  
 CY080525\_H3N2\_A/Hong\_Kong/1-10-MA21-1/1968\_Hong\_Kong\_6\_(NA)  
 CY118916\_H3N2\_A/Malaysia/1665090/2006\_Malaysia\_6\_(NA)  
 CY113367\_H3N2\_A/Shanghai/11/1987\_China\_6\_(NA)  
 CY112839\_H3N2\_A/Hong\_Kong/1/1997\_Hong\_Kong\_6\_(NA)  
 JX046928\_H1N1\_A/Moscow/IIV-45/2012\_Russia\_6\_(NA)  
 CY049989\_H1N1\_A/Mexico\_City/WR1087T/2009\_Mexico\_6\_(NA)  
 GQ132138.1|\_H1N1\_A/Mexico/InDRE4114/2009  
 CY021959\_H1N1\_A/New\_Jersey/1976\_USA\_6\_(NA)  
 AF250356\_H1N1\_A/Brevig\_Mission/1/1918\_USA\_6\_(NA)  
 CY013273\_H1N1\_A/Hickox/1940\_USA\_6\_(NA)  
 CY009606\_H1N1\_A/Wilson-Smith/1933\_United\_Kingdom\_6\_(NA)  
 CY045774\_H1N1\_A/Melbourne/1/1946\_Australia\_6\_(NA)  
 CY020447\_H1N1\_A/Henry/1936\_USA\_6\_(NA)  
 CY006669\_H1N1\_A/New\_York/493/2003\_USA\_6\_(NA)  
 CY009342\_H1N1\_A/Malaysia/1954\_Malaysia\_6\_(NA)  
 CY010374\_H1N1\_A/USSR/90/1977\_Russia\_6\_(NA)  
 CY021039\_H1N1\_A/Christ's\_Hospital/157/1982\_United\_Kingdom\_6\_(NA)

TCAAATTACAGGGTTGCCCCCTTTT  
 TCAAATTACAGGATTTGCACCTTTT  
 TCAAATTACAGGATTTGCACCTTTT  
 TCAAATTACAGGATTTGCACCTTTT  
 TGACATTACAGGATTTGCACCTTTT  
 TAAATTTACAGGATTTGCACCTTTT  
 TAAATTTACAGGATTTGCACCTTTT  
 CCCTGTTAGTGGATGGGCTATATAC  
 CCCTGTTAGTGGATGGGCTATATAC  
 CCCAATCAGTGGGTGGGCTATATAC  
 TCCCATCAGTGGGTGGGCTATATAC  
 CCCTATCCGTGGGTGGGCTATATAC  
 TCCCATCCGTGGGTGGGCTATACAC  
 TCCCATCCGTGGGTGGGCTATATAC  
 TCCCATCCGTGGGTGGGCTATATAC  
 TTCTATCAGTGGATGGGCTATATAC  
 TCCTATCCGTGGGTGGGCTATATAC  
 TCCTATCCGTGGGTGGGCTATATAC  
 TCCTATCCGTGGGTGGGCTATATAC

326

AJ404629\_H9N2\_A/Hong\_Kong/1073/99\_Hong\_Kong\_6\_(NA)  
 CY087802\_H2N2\_A/Japan/305-MA12/1957\_Japan\_6\_(NA)  
 CY032263\_H2N2\_A/Cottbus/1/1964\_Germany\_6\_(NA)  
 CY080525\_H3N2\_A/Hong\_Kong/1-10-MA21-1/1968\_Hong\_Kong\_6\_(NA)  
 CY118916\_H3N2\_A/Malaysia/1665090/2006\_Malaysia\_6\_(NA)  
 CY113367\_H3N2\_A/Shanghai/11/1987\_China\_6\_(NA)  
 CY112839\_H3N2\_A/Hong\_Kong/1/1997\_Hong\_Kong\_6\_(NA)  
 JX046928\_H1N1\_A/Moscow/IIV-45/2012\_Russia\_6\_(NA)  
 CY049989\_H1N1\_A/Mexico\_City/WR1087T/2009\_Mexico\_6\_(NA)  
 GQ132138.1|\_H1N1\_A/Mexico/InDRE4114/2009  
 CY021959\_H1N1\_A/New\_Jersey/1976\_USA\_6\_(NA)  
 AF250356\_H1N1\_A/Brevig\_Mission/1/1918\_USA\_6\_(NA)  
 CY013273\_H1N1\_A/Hickox/1940\_USA\_6\_(NA)  
 CY009606\_H1N1\_A/Wilson-Smith/1933\_United\_Kingdom\_6\_(NA)  
 CY045774\_H1N1\_A/Melbourne/1/1946\_Australia\_6\_(NA)  
 CY020447\_H1N1\_A/Henry/1936\_USA\_6\_(NA)  
 CY006669\_H1N1\_A/New\_York/493/2003\_USA\_6\_(NA)  
 CY009342\_H1N1\_A/Malaysia/1954\_Malaysia\_6\_(NA)  
 CY010374\_H1N1\_A/USSR/90/1977\_Russia\_6\_(NA)  
 CY021039\_H1N1\_A/Christ's\_Hospital/157/1982\_United\_Kingdom\_6\_(NA)

TCCAAGGACAACCTCAATTAGGCTTTT  
 TCTAAGGACAATTCAATCCGGCTTTT  
 TCTAAGGACAATTCAATCCGGCTTTT  
 TCTAAGGACAATTCAATCCGGATTTT  
 TCTAAGGACAACCTCGATTAGGCTTTT  
 TCTAAGGACAACCTCAATTCCGGCTTTT  
 AGTAAAGACAACAGTATAAGAATCG  
 AGTAAAGACAACAGTATAAGAATCG  
 AGTAAAGACAACAGTATAAGAATCG  
 AGCAAAGACAATAGCATAAGGATTG  
 AGCAAAGACAATGGCATAAGAATTG  
 AGCAAAGACAATGGCGTAAAGAATTG  
 AGCAAAGACAATGGCATAAGAATTG  
 AGCAAAGACAATGGCATAAGAATTG  
 AGCAAAGACAATAGCATAAGAATTG  
 ACAAAGACAACAGCATAAGAATTG  
 AGCAAAGACAACAGCATAAGGATTG  
 AGCAAAGACAACAGCATAAGAATTG  
 AGCAAAGACAACAGCATAAGAATTG

351

AJ404629\_H9N2\_A/Hong\_Kong/1073/99\_Hong\_Kong\_6\_(NA)  
 CY087802\_H2N2\_A/Japan/305-MA12/1957\_Japan\_6\_(NA)  
 CY032263\_H2N2\_A/Cottbus/1/1964\_Germany\_6\_(NA)  
 CY080525\_H3N2\_A/Hong\_Kong/1-10-MA21-1/1968\_Hong\_Kong\_6\_(NA)  
 CY118916\_H3N2\_A/Malaysia/1665090/2006\_Malaysia\_6\_(NA)  
 CY113367\_H3N2\_A/Shanghai/11/1987\_China\_6\_(NA)  
 CY112839\_H3N2\_A/Hong\_Kong/1/1997\_Hong\_Kong\_6\_(NA)  
 JX046928\_H1N1\_A/Moscow/IIV-45/2012\_Russia\_6\_(NA)  
 CY049989\_H1N1\_A/Mexico\_City/WR1087T/2009\_Mexico\_6\_(NA)  
 GQ132138.1|\_H1N1\_A/Mexico/InDRE4114/2009  
 CY021959\_H1N1\_A/New\_Jersey/1976\_USA\_6\_(NA)  
 AF250356\_H1N1\_A/Brevig\_Mission/1/1918\_USA\_6\_(NA)  
 CY013273\_H1N1\_A/Hickox/1940\_USA\_6\_(NA)  
 CY009606\_H1N1\_A/Wilson-Smith/1933\_United\_Kingdom\_6\_(NA)  
 CY045774\_H1N1\_A/Melbourne/1/1946\_Australia\_6\_(NA)  
 CY020447\_H1N1\_A/Henry/1936\_USA\_6\_(NA)  
 CY006669\_H1N1\_A/New\_York/493/2003\_USA\_6\_(NA)  
 CY009342\_H1N1\_A/Malaysia/1954\_Malaysia\_6\_(NA)  
 CY010374\_H1N1\_A/USSR/90/1977\_Russia\_6\_(NA)  
 CY021039\_H1N1\_A/Christ's\_Hospital/157/1982\_United\_Kingdom\_6\_(NA)

CTGCAAGGCGGGGATATTTGGGTGAC  
 CTGCTGGTGGGGACATTTGGGTGAC  
 CTGCTGGTGGGGACATTTGGGTGAC  
 CTGCTGGTGGGGACATTTGGGTGAC  
 CAGCTGGTGGGGACATCTGGGTGAC  
 CCGCTGGTGGGACATTTGGGTGAC  
 CCGCTGGTGGGACATTTGGGTGAC  
 GTTCCAAGGGGGATGTGTTTGTTCAT  
 GTTCCAAGGGGGATGTGTTTGTTCAT  
 GTTCCAAGGGAGACATTTTGTTCAT  
 GTTCCAAGGGAGACGTTTTTGTTCAT  
 GTTCCAAGGGAGATGTTTTTGTTCAT  
 GTTCCAAGGGAGACATTTTGTTCAT  
 GTTCCAAGGGAGACATTTTGTTCAT  
 GTTCCAAGGGAGATGTTTTTGTTCAT  
 GTTCCAAGGGAGATGTTTTTGTTCAT  
 GTTCCAAGGGAGATGTTTTTGTTCAT  
 GTTCCAAGGGAGATGTTTTTGTTCAT



AJ404629\_H9N2\_A/Hong\_Kong/1073/99\_Hong\_Kong\_6\_(NA)  
CY087802\_H2N2\_A/Japan/305-MA12/1957\_Japan\_6\_(NA)  
CY032263\_H2N2\_A/Cottbus/1/1964\_Germany\_6\_(NA)  
CY080525\_H3N2\_A/Hong\_Kong/1-10-MA21-1/1968\_Hong\_Kong\_6\_(NA)  
CY118916\_H3N2\_A/Malaysia/1665090/2006\_Malaysia\_6\_(NA)  
CY113367\_H3N2\_A/Shanghai/11/1987\_China\_6\_(NA)  
CY112839\_H3N2\_A/Hong\_Kong/1/1997\_Hong\_Kong\_6\_(NA)  
JX046928\_H1N1\_A/Moscow/IIV-45/2012\_Russia\_6\_(NA)  
CY049989\_H1N1\_A/Mexico\_City/WR1087T/2009\_Mexico\_6\_(NA)  
GQ132138.1|\_H1N1\_A/Mexico/InDRE4114/2009  
CY021959\_H1N1\_A/New\_Jersey/1976\_USA\_6\_(NA)  
AF250356\_H1N1\_A/Brevig\_Mission/1/1918\_USA\_6\_(NA)  
CY013273\_H1N1\_A/Hickox/1940\_USA\_6\_(NA)  
CY009606\_H1N1\_A/Wilson-Smith/1933\_United\_Kingdom\_6\_(NA)  
CY045774\_H1N1\_A/Melbourne/1/1946\_Australia\_6\_(NA)  
CY020447\_H1N1\_A/Henry/1936\_USA\_6\_(NA)  
CY006669\_H1N1\_A/New\_York/493/2003\_USA\_6\_(NA)  
CY009342\_H1N1\_A/Malaysia/1954\_Malaysia\_6\_(NA)  
CY010374\_H1N1\_A/USSR/90/1977\_Russia\_6\_(NA)  
CY021039\_H1N1\_A/Christ's\_Hospital/157/1982\_United\_Kingdom\_6\_(NA)

AAGAGAAACCTTATGATGTCATGCGAT  
GAGAGAAACCTTATGATGTCATGCGAT  
GAGAGAAACCTTATGATGTCATGCGAT  
GAGAGAAACCTTATGATGTCATGCGAT  
AAGAGAAACCTTATGATGTCATGCGAT  
AAGAGAAACCTTATGATGTCATGCGAT  
AAGAGAAACCTTATGATGTCATGCGAT  
AAGAGAAACCTTATGATGTCATGCGAT  
AAGGGAAACCATTCATATCATGCTCC  
AAGGGAAACCATTCATATCATGCTCC  
AAGGGAAACCATTCATATCATGCTCC  
GAGAGAGCCATTCATTCATGCTCT  
AAGAGAGCCATTTTATTTTCATGTTCT  
AAGAGAAACCTTTTATTTTCATGTTCT  
AAGAGAGCCTTTATTTTCATGTTCT  
AAGAGAGCCTTTATTTTCATGTTCT  
AAGAGAGCCCTTTTATTTTCATGTTCT  
AAGAGAGCCCTTTTATTTTCATGTTCT  
AAGAGAAACCTTTTATATATCATGTTCT  
AAGAGAAACCTTTTATATATCATGTTCT  
AAGAGAAACCTTTTATATATCATGTTCT

AJ404629\_H9N2\_A/Hong\_Kong/1073/99\_Hong\_Kong\_6\_(NA)  
CY087802\_H2N2\_A/Japan/305-MA12/1957\_Japan\_6\_(NA)  
CY032263\_H2N2\_A/Cottbus/1/1964\_Germany\_6\_(NA)  
CY080525\_H3N2\_A/Hong\_Kong/1-10-MA21-1/1968\_Hong\_Kong\_6\_(NA)  
CY118916\_H3N2\_A/Malaysia/1665090/2006\_Malaysia\_6\_(NA)  
CY113367\_H3N2\_A/Shanghai/11/1987\_China\_6\_(NA)  
CY112839\_H3N2\_A/Hong\_Kong/1/1997\_Hong\_Kong\_6\_(NA)  
JX046928\_H1N1\_A/Moscow/IIV-45/2012\_Russia\_6\_(NA)  
CY049989\_H1N1\_A/Mexico\_City/WR1087T/2009\_Mexico\_6\_(NA)  
GQ132138.1|\_H1N1\_A/Mexico/InDRE4114/2009  
CY021959\_H1N1\_A/New\_Jersey/1976\_USA\_6\_(NA)  
AF250356\_H1N1\_A/Brevig\_Mission/1/1918\_USA\_6\_(NA)  
CY013273\_H1N1\_A/Hickox/1940\_USA\_6\_(NA)  
CY009606\_H1N1\_A/Wilson-Smith/1933\_United\_Kingdom\_6\_(NA)  
CY045774\_H1N1\_A/Melbourne/1/1946\_Australia\_6\_(NA)  
CY020447\_H1N1\_A/Henry/1936\_USA\_6\_(NA)  
CY006669\_H1N1\_A/New\_York/493/2003\_USA\_6\_(NA)  
CY009342\_H1N1\_A/Malaysia/1954\_Malaysia\_6\_(NA)  
CY010374\_H1N1\_A/USSR/90/1977\_Russia\_6\_(NA)  
CY021039\_H1N1\_A/Christ's\_Hospital/157/1982\_United\_Kingdom\_6\_(NA)

AJ404629\_H9N2\_A/Hong\_Kong/1073/99\_Hong\_Kong\_6\_(NA)  
CY087802\_H2N2\_A/Japan/305-MA12/1957\_Japan\_6\_(NA)  
CY032263\_H2N2\_A/Cottbus/1/1964\_Germany\_6\_(NA)  
CY080525\_H3N2\_A/Hong\_Kong/1-10-MA21-1/1968\_Hong\_Kong\_6\_(NA)  
CY118916\_H3N2\_A/Malaysia/1665090/2006\_Malaysia\_6\_(NA)  
CY113367\_H3N2\_A/Shanghai/11/1987\_China\_6\_(NA)  
CY112839\_H3N2\_A/Hong\_Kong/1/1997\_Hong\_Kong\_6\_(NA)  
JX046928\_H1N1\_A/Moscow/IIV-45/2012\_Russia\_6\_(NA)  
CY049989\_H1N1\_A/Mexico\_City/WR1087T/2009\_Mexico\_6\_(NA)  
GQ132138.1|\_H1N1\_A/Mexico/InDRE4114/2009  
CY021959\_H1N1\_A/New\_Jersey/1976\_USA\_6\_(NA)  
AF250356\_H1N1\_A/Brevig\_Mission/1/1918\_USA\_6\_(NA)  
CY013273\_H1N1\_A/Hickox/1940\_USA\_6\_(NA)  
CY009606\_H1N1\_A/Wilson-Smith/1933\_United\_Kingdom\_6\_(NA)  
CY045774\_H1N1\_A/Melbourne/1/1946\_Australia\_6\_(NA)  
CY020447\_H1N1\_A/Henry/1936\_USA\_6\_(NA)  
CY006669\_H1N1\_A/New\_York/493/2003\_USA\_6\_(NA)  
CY009342\_H1N1\_A/Malaysia/1954\_Malaysia\_6\_(NA)  
CY010374\_H1N1\_A/USSR/90/1977\_Russia\_6\_(NA)  
CY021039\_H1N1\_A/Christ's\_Hospital/157/1982\_United\_Kingdom\_6\_(NA)

Sequence logo for the 10bp motif. The y-axis represents information content in bits (0.00 to 0.40). The x-axis shows positions 1 to 10. The sequence logo shows a strong preference for T at position 1, G at position 2, A at position 3, C at position 4, and G at position 5. Positions 6-10 show a strong preference for T, G, C, T, A respectively.

| Position | T    | C    | G    | A    |
|----------|------|------|------|------|
| 1        | 0.38 | 0.02 | 0.02 | 0.02 |
| 2        | 0.02 | 0.02 | 0.38 | 0.02 |
| 3        | 0.02 | 0.02 | 0.02 | 0.38 |
| 4        | 0.02 | 0.38 | 0.02 | 0.02 |
| 5        | 0.02 | 0.02 | 0.38 | 0.02 |
| 6        | 0.38 | 0.02 | 0.02 | 0.02 |
| 7        | 0.02 | 0.02 | 0.38 | 0.02 |
| 8        | 0.02 | 0.38 | 0.02 | 0.02 |
| 9        | 0.02 | 0.02 | 0.02 | 0.38 |
| 10       | 0.02 | 0.02 | 0.02 | 0.38 |

AJ404629\_H9N2\_A/Hong\_Kong/1073/99\_Hong\_Kong\_6\_(NA)  
CY087802\_H2N2\_A/Japan/305-MA12/1957\_Japan\_6\_(NA)  
CY032263\_H2N2\_A/Cottbus/1/1964\_Germany\_6\_(NA)  
CY080525\_H3N2\_A/Hong\_Kong/1-10-MA21-1/1968\_Hong\_Kong\_6\_(NA)  
CY118916\_H3N2\_A/Malaysia/1665090/2006\_Malaysia\_6\_(NA)  
CY113367\_H3N2\_A/Shanghai/11/1987\_China\_6\_(NA)  
CY112839\_H3N2\_A/Hong\_Kong/1/1997\_Hong\_Kong\_6\_(NA)  
JX046928\_H1N1\_A/Moscow/IIV-45/2012\_Russia\_6\_(NA)  
CY049989\_H1N1\_A/Mexico\_City/WR1087T/2009\_Mexico\_6\_(NA)  
GQ132138.1|\_H1N1\_A/Mexico/InDRE4114/2009  
CY021959\_H1N1\_A/New\_Jersey/1976\_USA\_6\_(NA)  
AF250356\_H1N1\_A/Brevig\_Mission/1/1918\_USA\_6\_(NA)  
CY013273\_H1N1\_A/Hickox/1940\_USA\_6\_(NA)  
CY009606\_H1N1\_A/Wilson-Smith/1933\_United\_Kingdom\_6\_(NA)  
CY045774\_H1N1\_A/Melbourne/1/1946\_Australia\_6\_(NA)  
CY020447\_H1N1\_A/Henry/1936\_USA\_6\_(NA)  
CY006669\_H1N1\_A/New\_York/493/2003\_USA\_6\_(NA)  
CY009342\_H1N1\_A/Malaysia/1954\_Malaysia\_6\_(NA)  
CY010374\_H1N1\_A/USSR/90/1977\_Russia\_6\_(NA)  
CY021039\_H1N1\_A/Christ's\_Hospital/157/1982\_United\_Kingdom\_6\_(NA)

[illegible]

AJ404629\_H9N2\_A/Hong\_Kong/1073/99\_Hong\_Kong\_6\_(NA)  
CY087802\_H2N2\_A/Japan/305-MA12/1957\_Japan\_6\_(NA)  
CY032263\_H2N2\_A/Cottbus/1/1964\_Germany\_6\_(NA)  
CY080525\_H3N2\_A/Hong\_Kong/1-10-MA21-1/1968\_Hong\_Kong\_6\_(NA)  
CY118916\_H3N2\_A/Malaysia/1665090/2006\_Malaysia\_6\_(NA)  
CY113367\_H3N2\_A/Shanghai/11/1987\_China\_6\_(NA)  
CY112839\_H3N2\_A/Hong\_Kong/1/1997\_Hong\_Kong\_6\_(NA)  
JX046928\_H1N1\_A/Moscow/IIV-45/2012\_Russia\_6\_(NA)  
CY049989\_H1N1\_A/Mexico\_City/WR1087T/2009\_Mexico\_6\_(NA)  
GQ132138.1|\_H1N1\_A/Mexico/InDRE4114/2009  
CY021959\_H1N1\_A/New\_Jersey/1976\_USA\_6\_(NA)  
AF250356\_H1N1\_A/Brevig\_Mission/1/1918\_USA\_6\_(NA)  
CY013273\_H1N1\_A/Hickox/1940\_USA\_6\_(NA)  
CY009606\_H1N1\_A/Wilson-Smith/1933\_United\_Kingdom\_6\_(NA)  
CY045774\_H1N1\_A/Melbourne/1/1946\_Australia\_6\_(NA)  
CY020447\_H1N1\_A/Henry/1936\_USA\_6\_(NA)  
CY006669\_H1N1\_A/New\_York/493/2003\_USA\_6\_(NA)  
CY009342\_H1N1\_A/Malaysia/1954\_Malaysia\_6\_(NA)  
CY010374\_H1N1\_A/USSR/90/1977\_Russia\_6\_(NA)  
CY021039\_H1N1\_A/Christ's\_Hospital/157/1982\_United\_Kingdom\_6\_(NA)

GATAGGAGTCCCATAGAACCCTTT  
GATAGAATCCCTCATCGAACCCATAT  
GATAGAATCCCTCATCGAACCCATAT  
GATAGAATCCCTCATCGAACCCATAT  
GATAGGACCCCTTATCGGACCCATAT  
GATAGGACCCCTTATCGAACCCCTCT  
GATAGGACCCCTTATCGAACCCATAT  
GACAGGAGCCCATATCGAACCTT--  
GACAGGAGCCCATATCGAACCCCT--  
GACAGGAGCCCATATCGAACCCCT--  
GACAGGAGTCCCTTATAGAACCCTT--  
GACAGAAGCCCCATATAGAACCCTT--  
GACAGAAGCCCTTATAGGGCCTT--  
GACAGAAGCCCTTATAGGGCCTT--  
GACAGAAGCCCTTATAGGGCCTT--  
GACAGAAGCCCTTATAGGGCCTT--  
GACAGAAGTCCCTTATAGGGCCTT--  
GACAGAAGCCCTTATAGGGCCTT--  
GACAGAAGCCCTTATAGGGCCTT--  
GACAGAAGCCCTTATAGGGCCTT--

AJ404629\_H9N2\_A/Hong\_Kong/1073/99\_Hong\_Kong\_6\_(NA)  
CY087802\_H2N2\_A/Japan/305-MA12/1957\_Japan\_6\_(NA)  
CY032263\_H2N2\_A/Cottbus/1/1964\_Germany\_6\_(NA)  
CY080525\_H3N2\_A/Hong\_Kong/1-10-MA21-1/1968\_Hong\_Kong\_6\_(NA)  
CY118916\_H3N2\_A/Malaysia/1665090/2006\_Malaysia\_6\_(NA)  
CY113367\_H3N2\_A/Shanghai/11/1987\_China\_6\_(NA)  
CY112839\_H3N2\_A/Hong\_Kong/1/1997\_Hong\_Kong\_6\_(NA)  
JX046928\_H1N1\_A/Moscow/IIV-45/2012\_Russia\_6\_(NA)  
CY049989\_H1N1\_A/Mexico\_City/WR1087T/2009\_Mexico\_6\_(NA)  
GQ132138.1|\_H1N1\_A/Mexico/InDRE4114/2009  
CY021959\_H1N1\_A/New\_Jersey/1976\_USA\_6\_(NA)  
AF250356\_H1N1\_A/Brevig\_Mission/1/1918\_USA\_6\_(NA)  
CY013273\_H1N1\_A/Hickox/1940\_USA\_6\_(NA)  
CY009606\_H1N1\_A/Wilson-Smith/1933\_United\_Kingdom\_6\_(NA)  
CY045774\_H1N1\_A/Melbourne/1/1946\_Australia\_6\_(NA)  
CY020447\_H1N1\_A/Henry/1936\_USA\_6\_(NA)  
CY006669\_H1N1\_A/New\_York/493/2003\_USA\_6\_(NA)  
CY009342\_H1N1\_A/Malaysia/1954\_Malaysia\_6\_(NA)  
CY010374\_H1N1\_A/USSR/90/1977\_Russia\_6\_(NA)  
CY021039\_H1N1\_A/Christ's\_Hospital/157/1982\_United\_Kingdom\_6\_(NA)

Sequence logo for the 10bp motif. The y-axis shows information content in bits (0.00 to 1.50). The x-axis shows positions 1 to 10. The logo is color-coded: blue for A, red for G, green for C, and yellow for T. The sequence TAATGAATGAGTTG is highlighted in blue. The sequence TGATGAATGAGTTA is highlighted in red. The sequence TGAATGAATGAGTTG is highlighted in green. The sequence TGAATGAATGAGTTG is highlighted in yellow.

AJ404629\_H9N2\_A/Hong\_Kong/1073/99\_Hong\_Kong\_6\_(NA)  
 CY087802\_H2N2\_A/Japan/305-MA12/1957\_Japan\_6\_(NA)  
 CY032263\_H2N2\_A/Cottbus/1/1964\_Germany\_6\_(NA)  
 CY080525\_H3N2\_A/Hong\_Kong/1-10-MA21-1/1968\_Hong\_Kong\_6\_(NA)  
 CY118916\_H3N2\_A/Malaysia/1665090/2006\_Malaysia\_6\_(NA)  
 CY113367\_H3N2\_A/Shanghai/11/1987\_China\_6\_(NA)  
 CY112839\_H3N2\_A/Hong\_Kong/1/1997\_Hong\_Kong\_6\_(NA)  
 JX046928\_H1N1\_A/Moscow/IIV-45/2012\_Russia\_6\_(NA)  
 CY049989\_H1N1\_A/Mexico\_City/WR1087T/2009\_Mexico\_6\_(NA)  
 GQ132138.1|\_H1N1\_A/Mexico/InDRE4114/2009  
 CY021959\_H1N1\_A/New\_Jersey/1976\_USA\_6\_(NA)  
 AF250356\_H1N1\_A/Brevig\_Mission/1/1918\_USA\_6\_(NA)  
 CY013273\_H1N1\_A/Hickox/1940\_USA\_6\_(NA)  
 CY009606\_H1N1\_A/Wilson-Smith/1933\_United\_Kingdom\_6\_(NA)  
 CY045774\_H1N1\_A/Melbourne/1/1946\_Australia\_6\_(NA)  
 CY020447\_H1N1\_A/Henry/1936\_USA\_6\_(NA)  
 CY006669\_H1N1\_A/New\_York/493/2003\_USA\_6\_(NA)  
 CY009342\_H1N1\_A/Malaysia/1954\_Malaysia\_6\_(NA)  
 CY010374\_H1N1\_A/USSR/90/1977\_Russia\_6\_(NA)  
 CY021039\_H1N1\_A/Christ's\_Hospital/157/1982\_United\_Kingdom\_6\_(NA)

Sequence logo for the 10bp region 5'-GTGTTCCATTTC-3'. The logo shows the conservation of each base position. The first 10 positions (GTGTTCCATTTC) are highly conserved, with 'T' at position 10 being the most frequent. The last 10 positions (AATTAGGAGAGAGAG) are less conserved, with 'A' at position 20 being the most frequent. The y-axis represents information content in bits, ranging from 0 to 2.5. The x-axis represents the 20 positions of the sequence.

AJ404629\_H9N2\_A/Hong\_Kong/1073/99\_Hong\_Kong\_6\_(NA)  
CY087802\_H2N2\_A/Japan/305-MA12/1957\_Japan\_6\_(NA)  
CY032263\_H2N2\_A/Cottbus/1/1964\_Germany\_6\_(NA)  
CY080525\_H3N2\_A/Hong\_Kong/1-10-MA21-1/1968\_Hong\_Kong\_6\_(NA)  
CY118916\_H3N2\_A/Malaysia/1665090/2006\_Malaysia\_6\_(NA)  
CY113367\_H3N2\_A/Shanghai/11/1987\_China\_6\_(NA)  
CY112839\_H3N2\_A/Hong\_Kong/1/1997\_Hong\_Kong\_6\_(NA)  
JX046928\_H1N1\_A/Moscow/IIV-45/2012\_Russia\_6\_(NA)  
CY049989\_H1N1\_A/Mexico\_City/WR1087T/2009\_Mexico\_6\_(NA)  
GQ132138.1|\_H1N1\_A/Mexico/InDRE4114/2009  
CY021959\_H1N1\_A/New\_Jersey/1976\_USA\_6\_(NA)  
AF250356\_H1N1\_A/Brevig\_Mission/1/1918\_USA\_6\_(NA)  
CY013273\_H1N1\_A/Hickox/1940\_USA\_6\_(NA)  
CY009606\_H1N1\_A/Wilson-Smith/1933\_United\_Kingdom\_6\_(NA)  
CY045774\_H1N1\_A/Melbourne/1/1946\_Australia\_6\_(NA)  
CY020447\_H1N1\_A/Henry/1936\_USA\_6\_(NA)  
CY006669\_H1N1\_A/New\_York/493/2003\_USA\_6\_(NA)  
CY009342\_H1N1\_A/Malaysia/1954\_Malaysia\_6\_(NA)  
CY010374\_H1N1\_A/USSR/90/1977\_Russia\_6\_(NA)  
CY021039\_H1N1\_A/Christ's\_Hospital/157/1982\_United\_Kingdom\_6\_(NA)

51

|   |   |   |   |   |   |   |   |   |   |   |   |   |     |     |     |     |   |   |   |   |   |   |
|---|---|---|---|---|---|---|---|---|---|---|---|---|-----|-----|-----|-----|---|---|---|---|---|---|
| A | A | C | C | A | A | A | C | A | G | T | G | C | A   | T   | A   | G   | C | A | T | G | G |   |
| A | A | C | C | A | A | A | C | A | G | T | G | T | G   | T   | A   | G   | C | A | T | G | G |   |
| A | A | C | C | A | G | G | C | A | G | T | G | T | A   | T   | A   | G   | C | A | T | G | G |   |
| A | A | C | C | A | G | G | C | A | G | T | G | T | A   | T   | A   | G   | C | A | T | G | G |   |
| G | A | C | C | A | A | G | C | A | A | G | T | G | C   | A   | T   | A   | G | C | A | T | G | G |
| A | A | C | C | A | A | G | C | A | A | G | T | G | C   | A   | T   | A   | G | C | A | T | G | G |
| A | A | C | C | A | A | G | C | A | A | G | T | G | C   | A   | T   | A   | G | C | A | T | G | G |
| A | T | T | T | G | A | G | T | C | A | G | T | C | --- | --- | --- | --- | G | O | T | T | G | G |
| A | T | T | T | G | A | G | T | C | A | G | T | C | --- | --- | --- | --- | G | O | T | T | G | G |
| A | T | T | T | G | A | G | T | C | A | G | T | C | --- | --- | --- | --- | G | O | T | T | G | G |
| G | T | T | C | G | A | A | T | C | A | G | T | T | --- | --- | --- | --- | G | O | T | T | G | G |
| G | T | T | C | G | A | A | T | C | G | G | T | T | --- | --- | --- | --- | G | O | T | T | G | G |
| G | T | T | T | G | A | A | T | C | G | G | T | T | --- | --- | --- | --- | G | O | T | T | G | G |
| G | T | T | T | G | A | A | T | C | G | G | T | T | --- | --- | --- | --- | G | O | T | T | G | G |
| G | T | T | T | G | A | A | T | C | G | G | T | T | --- | --- | --- | --- | G | O | T | T | G | G |
| A | T | T | T | G | A | A | T | C | G | G | T | T | --- | --- | --- | --- | G | O | T | T | G | G |
| G | T | T | T | G | A | A | T | C | A | G | T | T | --- | --- | --- | --- | G | C | A | T | G | G |
| A | T | T | T | G | A | A | T | C | G | G | T | T | --- | --- | --- | --- | G | O | T | T | G | G |
| G | T | T | T | G | A | A | T | C | G | G | T | T | --- | --- | --- | --- | G | O | T | T | G | G |
| G | T | T | T | G | A | A | T | C | A | G | T | T | --- | --- | --- | --- | G | O | T | T | G | G |

AJ404629\_H9N2\_A/Hong\_Kong/1073/99\_Hong\_Kong\_6\_(NA)  
CY087802\_H2N2\_A/Japan/305-MA12/1957\_Japan\_6\_(NA)  
CY032263\_H2N2\_A/Cottbus/1/1964\_Germany\_6\_(NA)  
CY080525\_H3N2\_A/Hong\_Kong/1-10-MA21-1/1968\_Hong\_Kong\_6\_(NA)  
CY118916\_H3N2\_A/Malaysia/1665090/2006\_Malaysia\_6\_(NA)  
CY113367\_H3N2\_A/Shanghai/11/1987\_China\_6\_(NA)  
CY112839\_H3N2\_A/Hong\_Kong/1/1997\_Hong\_Kong\_6\_(NA)  
JX046928\_H1N1\_A/Moscow/IIV-45/2012\_Russia\_6\_(NA)  
CY049989\_H1N1\_A/Mexico\_City/WR1087T/2009\_Mexico\_6\_(NA)  
GQ132138.1|\_H1N1\_A/Mexico/InDRE4114/2009  
CY021959\_H1N1\_A/New\_Jersey/1976\_USA\_6\_(NA)  
AF250356\_H1N1\_A/Brevig\_Mission/1/1918\_USA\_6\_(NA)  
CY013273\_H1N1\_A/Hickox/1940\_USA\_6\_(NA)  
CY009606\_H1N1\_A/Wilson-Smith/1933\_United\_Kingdom\_6\_(NA)  
CY045774\_H1N1\_A/Melbourne/1/1946\_Australia\_6\_(NA)  
CY020447\_H1N1\_A/Henry/1936\_USA\_6\_(NA)  
CY006669\_H1N1\_A/New\_York/493/2003\_USA\_6\_(NA)  
CY009342\_H1N1\_A/Malaysia/1954\_Malaysia\_6\_(NA)  
CY010374\_H1N1\_A/USSR/90/1977\_Russia\_6\_(NA)  
CY021039\_H1N1\_A/Christ's\_Hospital/157/1982\_United\_Kingdom\_6\_(NA)

[illegible]



AJ404629\_H9N2\_A/Hong\_Kong/1073/99\_Hong\_Kong\_6\_(NA)  
CY087802\_H2N2\_A/Japan/305-MA12/1957\_Japan\_6\_(NA)  
CY032263\_H2N2\_A/Cottbus/1/1964\_Germany\_6\_(NA)  
CY080525\_H3N2\_A/Hong\_Kong/1-10-MA21-1/1968\_Hong\_Kong\_6\_(NA)  
CY118916\_H3N2\_A/Malaysia/1665090/2006\_Malaysia\_6\_(NA)  
CY113367\_H3N2\_A/Shanghai/11/1987\_China\_6\_(NA)  
CY112839\_H3N2\_A/Hong\_Kong/1/1997\_Hong\_Kong\_6\_(NA)  
JX046928\_H1N1\_A/Moscow/IIV-45/2012\_Russia\_6\_(NA)  
CY049989\_H1N1\_A/Mexico\_City/WR1087T/2009\_Mexico\_6\_(NA)  
GQ132138.1|\_H1N1\_A/Mexico/InDRE4114/2009  
CY021959\_H1N1\_A/New\_Jersey/1976\_USA\_6\_(NA)  
AF250356\_H1N1\_A/Brevig\_Mission/1/1918\_USA\_6\_(NA)  
CY013273\_H1N1\_A/Hickox/1940\_USA\_6\_(NA)  
CY009606\_H1N1\_A/Wilson-Smith/1933\_United\_Kingdom\_6\_(NA)  
CY045774\_H1N1\_A/Melbourne/1/1946\_Australia\_6\_(NA)  
CY020447\_H1N1\_A/Henry/1936\_USA\_6\_(NA)  
CY006669\_H1N1\_A/New\_York/493/2003\_USA\_6\_(NA)  
CY009342\_H1N1\_A/Malaysia/1954\_Malaysia\_6\_(NA)  
CY010374\_H1N1\_A/USSR/90/1977\_Russia\_6\_(NA)  
CY021039\_H1N1\_A/Christ's\_Hospital/157/1982\_United\_Kingdom\_6\_(NA)

[illegible]

AJ404629\_H9N2\_A/Hong\_Kong/1073/99\_Hong\_Kong\_6\_(NA)  
CY087802\_H2N2\_A/Japan/305-MA12/1957\_Japan\_6\_(NA)  
CY032263\_H2N2\_A/Cottbus/1/1964\_Germany\_6\_(NA)  
CY080525\_H3N2\_A/Hong\_Kong/1-10-MA21-1/1968\_Hong\_Kong\_6\_(NA)  
CY118916\_H3N2\_A/Malaysia/1665090/2006\_Malaysia\_6\_(NA)  
CY113367\_H3N2\_A/Shanghai/11/1987\_China\_6\_(NA)  
CY112839\_H3N2\_A/Hong\_Kong/1/1997\_Hong\_Kong\_6\_(NA)  
JX046928\_H1N1\_A/Moscow/IIV-45/2012\_Russia\_6\_(NA)  
CY049989\_H1N1\_A/Mexico\_City/WR1087T/2009\_Mexico\_6\_(NA)  
GQ132138.1|\_H1N1\_A/Mexico/InDRE4114/2009  
CY021959\_H1N1\_A/New\_Jersey/1976\_USA\_6\_(NA)  
AF250356\_H1N1\_A/Brevig\_Mission/1/1918\_USA\_6\_(NA)  
CY013273\_H1N1\_A/Hickox/1940\_USA\_6\_(NA)  
CY009606\_H1N1\_A/Wilson-Smith/1933\_United\_Kingdom\_6\_(NA)  
CY045774\_H1N1\_A/Melbourne/1/1946\_Australia\_6\_(NA)  
CY020447\_H1N1\_A/Henry/1936\_USA\_6\_(NA)  
CY006669\_H1N1\_A/New\_York/493/2003\_USA\_6\_(NA)  
CY009342\_H1N1\_A/Malaysia/1954\_Malaysia\_6\_(NA)  
CY010374\_H1N1\_A/USSR/90/1977\_Russia\_6\_(NA)  
CY021039\_H1N1\_A/Christ's\_Hospital/157/1982\_United\_Kingdom\_6\_(NA)

CACTGGGGGATGATAGAAATGCAACT  
CACTGGGGGATGATAGAAATGCAACT  
CACTGGGGGATGATAAAAAATGCAACT  
CACTGGGGGATGACAAAAATGCAACT  
AAAGGGGGGATGATAAAAAATGCAACT  
CACTGGGGGATGATAAAAAATGCAACT  
AACTGGGCATAAATGAAAAATGCAACT  
TTCTGGGCCAGACAATGGGGCAGTGT  
TTCTGGGCCAGACAATGGGGCAGTGT  
TTCTGGGCCAGACAATGGGGCAGTGT  
TTCCGGTCCAGATAAATGGAGCAGTGT  
TTCAGGTCCAGATAAATGGAGCAGTGT  
TTCTGGTCCAGATGATGGAGCAGTGT  
TTCTGGTCCAGATAAATGGAGCAGTGT  
TTCTGGTCCAGATAAATGGAGCAGTGT  
TTCAGGTCCAGATAAATGGAGCAGTGT  
TTCTGGTCCAGACAATGGAGCAGTGT  
TTCTGGTCCAGATGATGGAGCAGTGT  
TTCTGGTCCAGATGATGGAGCAGTGT  
TTCTGGTCCAGATGATGGAGCAGTGT

AJ404629\_H9N2\_A/Hong\_Kong/1073/99\_Hong\_Kong\_6\_(NA)  
CY087802\_H2N2\_A/Japan/305-MA12/1957\_Japan\_6\_(NA)  
CY032263\_H2N2\_A/Cottbus/1/1964\_Germany\_6\_(NA)  
CY080525\_H3N2\_A/Hong\_Kong/1-10-MA21-1/1968\_Hong\_Kong\_6\_(NA)  
CY118916\_H3N2\_A/Malaysia/1665090/2006\_Malaysia\_6\_(NA)  
CY113367\_H3N2\_A/Shanghai/11/1987\_China\_6\_(NA)  
CY112839\_H3N2\_A/Hong\_Kong/1/1997\_Hong\_Kong\_6\_(NA)  
JX046928\_H1N1\_A/Moscow/IIV-45/2012\_Russia\_6\_(NA)  
CY049989\_H1N1\_A/Mexico\_City/WR1087T/2009\_Mexico\_6\_(NA)  
GQ132138.1|\_H1N1\_A/Mexico/InDRE4114/2009  
CY021959\_H1N1\_A/New\_Jersey/1976\_USA\_6\_(NA)  
AF250356\_H1N1\_A/Brevig\_Mission/1/1918\_USA\_6\_(NA)  
CY013273\_H1N1\_A/Hickox/1940\_USA\_6\_(NA)  
CY009606\_H1N1\_A/Wilson-Smith/1933\_United\_Kingdom\_6\_(NA)  
CY045774\_H1N1\_A/Melbourne/1/1946\_Australia\_6\_(NA)  
CY020447\_H1N1\_A/Henry/1936\_USA\_6\_(NA)  
CY006669\_H1N1\_A/New\_York/493/2003\_USA\_6\_(NA)  
CY009342\_H1N1\_A/Malaysia/1954\_Malaysia\_6\_(NA)  
CY010374\_H1N1\_A/USSR/90/1977\_Russia\_6\_(NA)  
CY021039\_H1N1\_A/Christ's\_Hospital/157/1982\_United\_Kingdom\_6\_(NA)

GCTAGCATCATTTATGATGGGATGC  
GCTAGCTTCATTTATGACGGGAGGC  
GCTAGCTTCATTTATGACGGGAGGC  
GCTAGCTTCATTTATGACGGGAGGC  
GCTAGCTTCATTTACAGTGGGAGGC  
GCTAGCTTCATTTACGATGGGAGGC  
GCTGTGTTTAAAGTACAACGGCATAA  
GCTGTGTTTAAAGTACAACGGCATAA  
GCTGTGTTTAAAGTACAACGGCATAA  
GCTGTTTTTAAAAATACAATGGTATAA  
GCTGTGTTTAAAAATACAACGGTATAA  
GCTGTGTTTAAAAATACAACGGCATAA  
GCTGTATTTAAAAATACAACGGCATAA  
GCTGTATTTAAAAATACAACGGCATAA  
GCTGTATTTAAAAATACAACGGCATAA  
GCTGTATTTAAAAATACAACGGATAA  
GCTGTATTTAAAAATACAATGGCATAA  
GCTGTACTTAAAAATACAACGGCATAA  
GCTGTACTTAAAAATACAACGGCATAA

AJ404629\_H9N2\_A/Hong\_Kong/1073/99\_Hong\_Kong\_6\_(NA)  
CY087802\_H2N2\_A/Japan/305-MA12/1957\_Japan\_6\_(NA)  
CY032263\_H2N2\_A/Cottbus/1/1964\_Germany\_6\_(NA)  
CY080525\_H3N2\_A/Hong\_Kong/1-10-MA21-1/1968\_Hong\_Kong\_6\_(NA)  
CY118916\_H3N2\_A/Malaysia/1665090/2006\_Malaysia\_6\_(NA)  
CY113367\_H3N2\_A/Shanghai/11/1987\_China\_6\_(NA)  
CY112839\_H3N2\_A/Hong\_Kong/1/1997\_Hong\_Kong\_6\_(NA)  
JX046928\_H1N1\_A/Moscow/IIV-45/2012\_Russia\_6\_(NA)  
CY049989\_H1N1\_A/Mexico\_City/WR1087T/2009\_Mexico\_6\_(NA)  
GQ132138.1|\_H1N1\_A/Mexico/InDRE4114/2009  
CY021959\_H1N1\_A/New\_Jersey/1976\_USA\_6\_(NA)  
AF250356\_H1N1\_A/Brevig\_Mission/1/1918\_USA\_6\_(NA)  
CY013273\_H1N1\_A/Hickox/1940\_USA\_6\_(NA)  
CY009606\_H1N1\_A/Wilson-Smith/1933\_United\_Kingdom\_6\_(NA)  
CY045774\_H1N1\_A/Melbourne/1/1946\_Australia\_6\_(NA)  
CY020447\_H1N1\_A/Henry/1936\_USA\_6\_(NA)  
CY006669\_H1N1\_A/New\_York/493/2003\_USA\_6\_(NA)  
CY009342\_H1N1\_A/Malaysia/1954\_Malaysia\_6\_(NA)  
CY010374\_H1N1\_A/USSR/90/1977\_Russia\_6\_(NA)  
CY021039\_H1N1\_A/Christ's\_Hospital/157/1982\_United\_Kingdom\_6\_(NA)

[illegible]

AJ404629\_H9N2\_A/Hong\_Kong/1073/99\_Hong\_Kong\_6\_(NA)  
CY087802\_H2N2\_A/Japan/305-MA12/1957\_Japan\_6\_(NA)  
CY032263\_H2N2\_A/Cottbus/1/1964\_Germany\_6\_(NA)  
CY080525\_H3N2\_A/Hong\_Kong/1-10-MA21-1/1968\_Hong\_Kong\_6\_(NA)  
CY118916\_H3N2\_A/Malaysia/1665090/2006\_Malaysia\_6\_(NA)  
CY113367\_H3N2\_A/Shanghai/11/1987\_China\_6\_(NA)  
CY112839\_H3N2\_A/Hong\_Kong/1/1997\_Hong\_Kong\_6\_(NA)  
JX046928\_H1N1\_A/Moscow/IIV-45/2012\_Russia\_6\_(NA)  
CY049989\_H1N1\_A/Mexico\_City/WR1087T/2009\_Mexico\_6\_(NA)  
GQ132138.1|\_H1N1\_A/Mexico/InDRE4114/2009  
CY021959\_H1N1\_A/New\_Jersey/1976\_USA\_6\_(NA)  
AF250356\_H1N1\_A/Brevig\_Mission/1/1918\_USA\_6\_(NA)  
CY013273\_H1N1\_A/Hickox/1940\_USA\_6\_(NA)  
CY009606\_H1N1\_A/Wilson-Smith/1933\_United\_Kingdom\_6\_(NA)  
CY045774\_H1N1\_A/Melbourne/1/1946\_Australia\_6\_(NA)  
CY020447\_H1N1\_A/Henry/1936\_USA\_6\_(NA)  
CY006669\_H1N1\_A/New\_York/493/2003\_USA\_6\_(NA)  
CY009342\_H1N1\_A/Malaysia/1954\_Malaysia\_6\_(NA)  
CY010374\_H1N1\_A/USSR/90/1977\_Russia\_6\_(NA)  
CY021039\_H1N1\_A/Christ's\_Hospital/157/1982\_United\_Kingdom\_6\_(NA)

TAAGAAATATCCTCAGAACTCAGGAG  
TCAAAAATATCCTCAGGACCCAGGAG  
TCAAAAATATCCTCAGGACCCAGGAG  
TCAAAAATATCCTCAGAACCCAGGAG  
CAAAAGAAATCCTCAGGACCCAGGAG  
CAAAAATATCCTCAGGACCCAGGAG  
CAAAAATATCCTCAGGACCCAGGAG  
AAAACAATATATTGAGAACACAAGAG  
AAACAATATATTGAGAACACAAGAG  
AAACAATATATTGAGAACACAAGAG  
AAACAAAATATTGAAGAACACAAGAG  
GAACACAATATTGAGAACACAAGAG  
GAAGGAAATATTGAGAACACAAGAG  
GAAGAAAAATATTGAGAACACAAGAG  
GAAGAAAAATATTGAGAACACAAGAG  
GAAGAAAAATATTGAGAACACAAGAG  
AAAGCGAATATTGAGAACACAAGAG  
GAAGCAAAATATTGAAGAACACAAGAG  
GAAGCAAAATATTGAAGAACACAAGAG  
GAAGCGAATATTGAAGAACACAAGAG

AJ404629\_H9N2\_A/Hong\_Kong/1073/99\_Hong\_Kong\_6\_(NA)  
CY087802\_H2N2\_A/Japan/305-MA12/1957\_Japan\_6\_(NA)  
CY032263\_H2N2\_A/Cottbus/1/1964\_Germany\_6\_(NA)  
CY080525\_H3N2\_A/Hong\_Kong/1-10-MA21-1/1968\_Hong\_Kong\_6\_(NA)  
CY118916\_H3N2\_A/Malaysia/1665090/2006\_Malaysia\_6\_(NA)  
CY113367\_H3N2\_A/Shanghai/11/1987\_China\_6\_(NA)  
CY112839\_H3N2\_A/Hong\_Kong/1/1997\_Hong\_Kong\_6\_(NA)  
JX046928\_H1N1\_A/Moscow/IIV-45/2012\_Russia\_6\_(NA)  
CY049989\_H1N1\_A/Mexico\_City/WR1087T/2009\_Mexico\_6\_(NA)  
GQ132138.1|\_H1N1\_A/Mexico/InDRE4114/2009  
CY021959\_H1N1\_A/New\_Jersey/1976\_USA\_6\_(NA)  
AF250356\_H1N1\_A/Brevig\_Mission/1/1918\_USA\_6\_(NA)  
CY013273\_H1N1\_A/Hickox/1940\_USA\_6\_(NA)  
CY009606\_H1N1\_A/Wilson-Smith/1933\_United\_Kingdom\_6\_(NA)  
CY045774\_H1N1\_A/Melbourne/1/1946\_Australia\_6\_(NA)  
CY020447\_H1N1\_A/Henry/1936\_USA\_6\_(NA)  
CY006669\_H1N1\_A/New\_York/493/2003\_USA\_6\_(NA)  
CY009342\_H1N1\_A/Malaysia/1954\_Malaysia\_6\_(NA)  
CY010374\_H1N1\_A/USSR/90/1977\_Russia\_6\_(NA)  
CY021039\_H1N1\_A/Christ's\_Hospital/157/1982\_United\_Kingdom\_6\_(NA)

AJ404629\_H9N2\_A/Hong\_Kong/1073/99\_Hong\_Kong\_6\_(NA)  
CY087802\_H2N2\_A/Japan/305-MA12/1957\_Japan\_6\_(NA)  
CY032263\_H2N2\_A/Cottbus/1/1964\_Germany\_6\_(NA)  
CY080525\_H3N2\_A/Hong\_Kong/1-10-MA21-1/1968\_Hong\_Kong\_6\_(NA)  
CY118916\_H3N2\_A/Malaysia/1665090/2006\_Malaysia\_6\_(NA)  
CY113367\_H3N2\_A/Shanghai/11/1987\_China\_6\_(NA)  
CY112839\_H3N2\_A/Hong\_Kong/1/1997\_Hong\_Kong\_6\_(NA)  
JX046928\_H1N1\_A/Moscow/IIV-45/2012\_Russia\_6\_(NA)  
CY049989\_H1N1\_A/Mexico\_City/WR1087T/2009\_Mexico\_6\_(NA)  
GQ132138.1|\_H1N1\_A/Mexico/InDRE4114/2009  
CY021959\_H1N1\_A/New\_Jersey/1976\_USA\_6\_(NA)  
AF250356\_H1N1\_A/Brevig\_Mission/1/1918\_USA\_6\_(NA)  
CY013273\_H1N1\_A/Hickox/1940\_USA\_6\_(NA)  
CY009606\_H1N1\_A/Wilson-Smith/1933\_United\_Kingdom\_6\_(NA)  
CY045774\_H1N1\_A/Melbourne/1/1946\_Australia\_6\_(NA)  
CY020447\_H1N1\_A/Henry/1936\_USA\_6\_(NA)  
CY006669\_H1N1\_A/New\_York/493/2003\_USA\_6\_(NA)  
CY009342\_H1N1\_A/Malaysia/1954\_Malaysia\_6\_(NA)  
CY010374\_H1N1\_A/USSR/90/1977\_Russia\_6\_(NA)  
CY021039\_H1N1\_A/Christ's\_Hospital/157/1982\_United\_Kingdom\_6\_(NA)

[illegible]

AJ404629\_H9N2\_A/Hong\_Kong/1073/99\_Hong\_Kong\_6\_(NA)  
CY087802\_H2N2\_A/Japan/305-MA12/1957\_Japan\_6\_(NA)  
CY032263\_H2N2\_A/Cottbus/1/1964\_Germany\_6\_(NA)  
CY080525\_H3N2\_A/Hong\_Kong/1-10-MA21-1/1968\_Hong\_Kong\_6\_(NA)  
CY118916\_H3N2\_A/Malaysia/1665090/2006\_Malaysia\_6\_(NA)  
CY113367\_H3N2\_A/Shanghai/11/1987\_China\_6\_(NA)  
CY112839\_H3N2\_A/Hong\_Kong/1/1997\_Hong\_Kong\_6\_(NA)  
JX046928\_H1N1\_A/Moscow/IIV-45/2012\_Russia\_6\_(NA)  
CY049989\_H1N1\_A/Mexico\_City/WR1087T/2009\_Mexico\_6\_(NA)  
GQ132138.1|\_H1N1\_A/Mexico/InDRE4114/2009  
CY021959\_H1N1\_A/New\_Jersey/1976\_USA\_6\_(NA)  
AF250356\_H1N1\_A/Brevig\_Mission/1/1918\_USA\_6\_(NA)  
CY013273\_H1N1\_A/Hickox/1940\_USA\_6\_(NA)  
CY009606\_H1N1\_A/Wilson-Smith/1933\_United\_Kingdom\_6\_(NA)  
CY045774\_H1N1\_A/Melbourne/1/1946\_Australia\_6\_(NA)  
CY020447\_H1N1\_A/Henry/1936\_USA\_6\_(NA)  
CY006669\_H1N1\_A/New\_York/493/2003\_USA\_6\_(NA)  
CY009342\_H1N1\_A/Malaysia/1954\_Malaysia\_6\_(NA)  
CY010374\_H1N1\_A/USSR/90/1977\_Russia\_6\_(NA)  
CY021039\_H1N1\_A/Christ's\_Hospital/157/1982\_United\_Kingdom\_6\_(NA)

```

---AAGTGCATCAGGAAGGGCTGAT
---AAGTGCATCAGGAAGAGCCGAT
---AAGTGCTTCAGGAAGAGCCGAT
---AAGTGCTTCAGGAAGAGCCGAT
---GAGTGCTTCAGGAAGAGCTGAT
---AAGTGCTTCAGGAAGAGCTGAT
---AAGTGCTTCAGGAAGAGCTGAT
ACCAAGTGAT--GGACAGGCCTCAT
ACCAAGTGAT--GGACAGGCCTCAT
ACCAAGTAAT--GGACAGGCCTCAT
CCCAAGCAAT--GGGCAAGCCTCGT
CCCAAGTAAT--GGGACAGGCCTCGT
CCCGAGTGGT--GGGCCGGCCTCGT
CCCAGTAAT--GGGCTGGCCTCGT
CCCAGTGAT--GGGCCGGCCTCGT
CCCGAGTAAT--GGGCTGGCCTCGT
CCCGAGTAAT--GGGGCCGCCTCGT
CCCGAGTGAT--GGGCCGGCCTCGT
CCCGAGTGAT--GGGCCGGCCTCGT
CCCGAGTAAT--GGACCTGCCTCGT

```

AJ404629\_H9N2\_A/Hong\_Kong/1073/99\_Hong\_Kong\_6\_(NA)  
CY087802\_H2N2\_A/Japan/305-MA12/1957\_Japan\_6\_(NA)  
CY032263\_H2N2\_A/Cottbus/1/1964\_Germany\_6\_(NA)  
CY080525\_H3N2\_A/Hong\_Kong/1-10-MA21-1/1968\_Hong\_Kong\_6\_(NA)  
CY118916\_H3N2\_A/Malaysia/1665090/2006\_Malaysia\_6\_(NA)  
CY113367\_H3N2\_A/Shanghai/11/1987\_China\_6\_(NA)  
CY112839\_H3N2\_A/Hong\_Kong/1/1997\_Hong\_Kong\_6\_(NA)  
JX046928\_H1N1\_A/Moscow/IIV-45/2012\_Russia\_6\_(NA)  
CY049989\_H1N1\_A/Mexico\_City/WR1087T/2009\_Mexico\_6\_(NA)  
GQ132138.1|\_H1N1\_A/Mexico/InDRE4114/2009  
CY021959\_H1N1\_A/New\_Jersey/1976\_USA\_6\_(NA)  
AF250356\_H1N1\_A/Brevig\_Mission/1/1918\_USA\_6\_(NA)  
CY013273\_H1N1\_A/Hickox/1940\_USA\_6\_(NA)  
CY009606\_H1N1\_A/Wilson-Smith/1933\_United\_Kingdom\_6\_(NA)  
CY045774\_H1N1\_A/Melbourne/1/1946\_Australia\_6\_(NA)  
CY020447\_H1N1\_A/Henry/1936\_USA\_6\_(NA)  
CY006669\_H1N1\_A/New\_York/493/2003\_USA\_6\_(NA)  
CY009342\_H1N1\_A/Malaysia/1954\_Malaysia\_6\_(NA)  
CY010374\_H1N1\_A/USSR/90/1977\_Russia\_6\_(NA)  
CY021039\_H1N1\_A/Christ's\_Hospital/157/1982\_United\_Kingdom\_6\_(NA)

ACTAAAAATACTATTTCATTAGAGAAG  
ACTAGAATACTATTTCATTAAAGAGG  
ACTAGAATACTCTTTCATTGAAGAGG  
ACTAGAATACTATTTCATTGAAGAGG  
ACTAAAAATACTATTTCATTGAGGAGG  
ACTAAAAATACTATTTCATTGAAGAGG  
ACTAAAAATACTATTTCATTGAAGAGG  
AC-AAGATCTTCAGAATAGAAAAGG  
AC-AAGATCTTCAGAATAGAAAAGG  
AC-AAGATCTTCAGAATAGAAAAGG  
AC-AAATTAATTCAAAAATGGAGAAAG  
AC-AAAAATTTTAAAGATCGAGAAGG  
AC-AAAAATTTTCAAGATCGAGAAGG  
AC-AAAAATTTTCAAGATCGAGAAGG  
AC-AAAAATTTTCAAGATCGAGAAGG  
AC-AAAAATTTTCAAGATCGAGAAGG  
AC-AAAAATTTTCAAGATCGAGAAGG  
AC-AGAATCTTCAAAATCGAGAAGG  
AC-AGAATCTTCAAAATCGAGAAGG  
AC-AGAATCTTCAAAATCGAGAAGG

AJ404629\_H9N2\_A/Hong\_Kong/1073/99\_Hong\_Kong\_6\_(NA)  
 CY087802\_H2N2\_A/Japan/305-MA12/1957\_Japan\_6\_(NA)  
 CY032263\_H2N2\_A/Cottbus/1/1964\_Germany\_6\_(NA)  
 CY080525\_H3N2\_A/Hong\_Kong/1-10-MA21-1/1968\_Hong\_Kong\_6\_(NA)  
 CY118916\_H3N2\_A/Malaysia/1665090/2006\_Malaysia\_6\_(NA)  
 CY113367\_H3N2\_A/Shanghai/11/1987\_China\_6\_(NA)  
 CY112839\_H3N2\_A/Hong\_Kong/1/1997\_Hong\_Kong\_6\_(NA)  
 JX046928\_H1N1\_A/Moscow/IIV-45/2012\_Russia\_6\_(NA)  
 CY049989\_H1N1\_A/Mexico\_City/WR1087T/2009\_Mexico\_6\_(NA)  
 GQ132138.1|\_H1N1\_A/Mexico/InDRE4114/2009  
 CY021959\_H1N1\_A/New\_Jersey/1976\_USA\_6\_(NA)  
 AF250356\_H1N1\_A/Brevig\_Mission/1/1918\_USA\_6\_(NA)  
 CY013273\_H1N1\_A/Hickox/1940\_USA\_6\_(NA)  
 CY009606\_H1N1\_A/Wilson-Smith/1933\_United\_Kingdom\_6\_(NA)  
 CY045774\_H1N1\_A/Melbourne/1/1946\_Australia\_6\_(NA)  
 CY020447\_H1N1\_A/Henry/1936\_USA\_6\_(NA)  
 CY006669\_H1N1\_A/New\_York/493/2003\_USA\_6\_(NA)  
 CY009342\_H1N1\_A/Malaysia/1954\_Malaysia\_6\_(NA)  
 CY010374\_H1N1\_A/USSR/90/1977\_Russia\_6\_(NA)  
 CY021039\_H1N1\_A/Christ's\_Hospital/157/1982\_United\_Kingdom\_6\_(NA)

GGAAAAATTGTCACATTGGTCCACT  
GGAAAAATTGTCCATATTAGCCCATT  
GGAAAAATTGTCCATATTAGCCCATT  
GGAAAAATTGTCCATATTAGCCCATT  
GGAAATAGTTTCATATGACCAATT  
GGAAATCGTTTCATATTAGCCCATT  
GGAAAAATCGTTTCATATTAGCCAATT  
GAAAGATAGTCAAAATCAGTCGAAAT  
GAAAGATAGTCAAAATCAGTCGAAAT  
GAAAGATAGTCAAAATCAGTCGAAAT  
GGAAGATTATTAGGTCAATTGAGCT  
GGAAGGTTACTAAATCAATTGAGTT  
GGAAGGTTACTAAATCAATAGAGTT  
GGAAGGTTACTAAATCAATAGAGTT  
GGAAGGTTACTAAATCAATAGAGTT  
GGAAGGTTACTAAATCAATAGAGTT  
GGAAGATTACTAAATCAATAGAGTT  
GGAAGATTACTAAATCAATAGAGTT  
GGAAGATTACTAAATCAATAGAGTT

AJ404629\_H9N2\_A/Hong\_Kong/1073/99\_Hong\_Kong\_6\_(NA)  
CY087802\_H2N2\_A/Japan/305-MA12/1957\_Japan\_6\_(NA)  
CY032263\_H2N2\_A/Cottbus/1/1964\_Germany\_6\_(NA)  
CY080525\_H3N2\_A/Hong\_Kong/1-10-MA21-1/1968\_Hong\_Kong\_6\_(NA)  
CY118916\_H3N2\_A/Malaysia/1665090/2006\_Malaysia\_6\_(NA)  
CY113367\_H3N2\_A/Shanghai/11/1987\_China\_6\_(NA)  
CY112839\_H3N2\_A/Hong\_Kong/1/1997\_Hong\_Kong\_6\_(NA)  
JX046928\_H1N1\_A/Moscow/IIV-45/2012\_Russia\_6\_(NA)  
CY049989\_H1N1\_A/Mexico\_City/WR1087T/2009\_Mexico\_6\_(NA)  
GQ132138.1|\_H1N1\_A/Mexico/InDRE4114/2009  
CY021959\_H1N1\_A/New\_Jersey/1976\_USA\_6\_(NA)  
AF250356\_H1N1\_A/Brevig\_Mission/1/1918\_USA\_6\_(NA)  
CY013273\_H1N1\_A/Hickox/1940\_USA\_6\_(NA)  
CY009606\_H1N1\_A/Wilson-Smith/1933\_United\_Kingdom\_6\_(NA)  
CY045774\_H1N1\_A/Melbourne/1/1946\_Australia\_6\_(NA)  
CY020447\_H1N1\_A/Henry/1936\_USA\_6\_(NA)  
CY006669\_H1N1\_A/New\_York/493/2003\_USA\_6\_(NA)  
CY009342\_H1N1\_A/Malaysia/1954\_Malaysia\_6\_(NA)  
CY010374\_H1N1\_A/USSR/90/1977\_Russia\_6\_(NA)  
CY021039\_H1N1\_A/Christ's\_Hospital/157/1982\_United\_Kingdom\_6\_(NA)

GTCAGGAAGTGTCTCAGCATGTGGAG  
 GTCAGGAAGTGTCTCAGCATATAGAG  
 GTCAGGAAGTGTCTCAGCATGTAGAG  
 GTCAGGAAGTGTCTCAGCATGTAGAA  
 GTCAGGAAGTGTCTCAGCATGTGAG  
 GTCAGGAAGTGTCTCAGCATGTAGAG  
 GTCAGGAAGTGTCTCAGCATGTGAG  
 GAATGCCCTTAATTATCACTATGAG  
 GAATGCCCTTAATTATCACTATGAG  
 GAATGCCCTTAATTATCACTATGAG  
 GGATGCACCTAAATTACCACTATGAG  
 GAATGCACCTAAATTACCACTACGAG  
 GGATGCACCTAAATTCTCACTACGAG  
 GAATGCACCTAAATTCTCACTACGAG  
 GGATGCACCTAAATTCTCACTACGAG  
 GAATGCACCTAAATTCTCACTACGAG  
 GGATGCACCTAAATTCTCATTACGAG  
 GGATGCACCTAAATTCTCATTACGAG  
 GGATGCACCTAAATTCTCATTACGAG

AJ404629\_H9N2\_A/Hong\_Kong/1073/99\_Hong\_Kong\_6\_(NA)  
CY087802\_H2N2\_A/Japan/305-MA12/1957\_Japan\_6\_(NA)  
CY032263\_H2N2\_A/Cottbus/1/1964\_Germany\_6\_(NA)  
CY080525\_H3N2\_A/Hong\_Kong/1-10-MA21-1/1968\_Hong\_Kong\_6\_(NA)  
CY118916\_H3N2\_A/Malaysia/1665090/2006\_Malaysia\_6\_(NA)  
CY113367\_H3N2\_A/Shanghai/11/1987\_China\_6\_(NA)  
CY112839\_H3N2\_A/Hong\_Kong/1/1997\_Hong\_Kong\_6\_(NA)  
JX046928\_H1N1\_A/Moscow/IIV-45/2012\_Russia\_6\_(NA)  
CY049989\_H1N1\_A/Mexico\_City/WR1087T/2009\_Mexico\_6\_(NA)  
GQ132138.1|\_H1N1\_A/Mexico/InDRE4114/2009  
CY021959\_H1N1\_A/New\_Jersey/1976\_USA\_6\_(NA)  
AF250356\_H1N1\_A/Brevig\_Mission/1/1918\_USA\_6\_(NA)  
CY013273\_H1N1\_A/Hickox/1940\_USA\_6\_(NA)  
CY009606\_H1N1\_A/Wilson-Smith/1933\_United\_Kingdom\_6\_(NA)  
CY045774\_H1N1\_A/Melbourne/1/1946\_Australia\_6\_(NA)  
CY020447\_H1N1\_A/Henry/1936\_USA\_6\_(NA)  
CY006669\_H1N1\_A/New\_York/493/2003\_USA\_6\_(NA)  
CY009342\_H1N1\_A/Malaysia/1954\_Malaysia\_6\_(NA)  
CY010374\_H1N1\_A/USSR/90/1977\_Russia\_6\_(NA)  
CY021039\_H1N1\_A/Christ's\_Hospital/157/1982\_United\_Kingdom\_6\_(NA)

GAATGCTCCTGTTACCCCGGATATC  
GAGTGTTCCTGTTACCCCTGATATC  
GAGTGTTCCTGTTATCCTGATATC  
GAGTGTTCCTGTTATCCTAGATATC  
GAGTGTTCCTGCTATCCCTGATATC  
GAGTGTTCCTGTTATCCTGATATC  
GAGTGTTCCTGTTATCCTGATATC  
GAATGCTCCTGTTATCCTGATTCTA  
GAATGCTCCTGTTATCCTGATTCTA  
GAATGCTCCTGTTATCCTGATTCTA  
GAATGCTCCTGTTACCCCTGATACAG  
GAATGTTCCCTGTTACCCCTGATACAG  
GAATGTTCCCTGTTACCCCTGATACCA  
GAATGTTCCCTGTTACCCCTGATACCG  
GAGTGTTCCTGTTACCCCTGATACCG  
GAATGTTCCCTGTTACCCCTGATACCG  
GAATGTTCCCTGTTACCCAGACACTG  
GAATGTTCCCTGTTACCCAGACACCG  
GAATGTTCCCTGTTACCCAGACACCG  
GAATGTTCCCTGTTACCCAGACACCG

AJ404629\_H9N2\_A/Hong\_Kong/1073/99\_Hong\_Kong\_6\_(NA)  
CY087802\_H2N2\_A/Japan/305-MA12/1957\_Japan\_6\_(NA)  
CY032263\_H2N2\_A/Cottbus/1/1964\_Germany\_6\_(NA)  
CY080525\_H3N2\_A/Hong\_Kong/1-10-MA21-1/1968\_Hong\_Kong\_6\_(NA)  
CY118916\_H3N2\_A/Malaysia/1665090/2006\_Malaysia\_6\_(NA)  
CY113367\_H3N2\_A/Shanghai/11/1987\_China\_6\_(NA)  
CY112839\_H3N2\_A/Hong\_Kong/1/1997\_Hong\_Kong\_6\_(NA)  
JX046928\_H1N1\_A/Moscow/IIV-45/2012\_Russia\_6\_(NA)  
CY049989\_H1N1\_A/Mexico\_City/WR1087T/2009\_Mexico\_6\_(NA)  
GQ132138.1|\_H1N1\_A/Mexico/InDRE4114/2009  
CY021959\_H1N1\_A/New\_Jersey/1976\_USA\_6\_(NA)  
AF250356\_H1N1\_A/Brevig\_Mission/1/1918\_USA\_6\_(NA)  
CY013273\_H1N1\_A/Hickox/1940\_USA\_6\_(NA)  
CY009606\_H1N1\_A/Wilson-Smith/1933\_United\_Kingdom\_6\_(NA)  
CY045774\_H1N1\_A/Melbourne/1/1946\_Australia\_6\_(NA)  
CY020447\_H1N1\_A/Henry/1936\_USA\_6\_(NA)  
CY006669\_H1N1\_A/New\_York/493/2003\_USA\_6\_(NA)  
CY009342\_H1N1\_A/Malaysia/1954\_Malaysia\_6\_(NA)  
CY010374\_H1N1\_A/USSR/90/1977\_Russia\_6\_(NA)  
CY021039\_H1N1\_A/Christ's\_Hospital/157/1982\_United\_Kingdom\_6\_(NA)

[illegible]

AJ404629\_H9N2\_A/Hong\_Kong/1073/99\_Hong\_Kong\_6\_(NA)  
CY087802\_H2N2\_A/Japan/305-MA12/1957\_Japan\_6\_(NA)  
CY032263\_H2N2\_A/Cottbus/1/1964\_Germany\_6\_(NA)  
CY080525\_H3N2\_A/Hong\_Kong/1-10-MA21-1/1968\_Hong\_Kong\_6\_(NA)  
CY118916\_H3N2\_A/Malaysia/1665090/2006\_Malaysia\_6\_(NA)  
CY113367\_H3N2\_A/Shanghai/11/1987\_China\_6\_(NA)  
CY112839\_H3N2\_A/Hong\_Kong/1/1997\_Hong\_Kong\_6\_(NA)  
JX046928\_H1N1\_A/Moscow/IIV-45/2012\_Russia\_6\_(NA)  
CY049989\_H1N1\_A/Mexico\_City/WR1087T/2009\_Mexico\_6\_(NA)  
GQ132138.1|\_H1N1\_A/Mexico/InDRE4114/2009  
CY021959\_H1N1\_A/New\_Jersey/1976\_USA\_6\_(NA)  
AF250356\_H1N1\_A/Brevig\_Mission/1/1918\_USA\_6\_(NA)  
CY013273\_H1N1\_A/Hickox/1940\_USA\_6\_(NA)  
CY009606\_H1N1\_A/Wilson-Smith/1933\_United\_Kingdom\_6\_(NA)  
CY045774\_H1N1\_A/Melbourne/1/1946\_Australia\_6\_(NA)  
CY020447\_H1N1\_A/Henry/1936\_USA\_6\_(NA)  
CY006669\_H1N1\_A/New\_York/493/2003\_USA\_6\_(NA)  
CY009342\_H1N1\_A/Malaysia/1954\_Malaysia\_6\_(NA)  
CY010374\_H1N1\_A/USSR/90/1977\_Russia\_6\_(NA)  
CY021039\_H1N1\_A/Christ's\_Hospital/157/1982\_United\_Kingdom\_6\_(NA)

CAATTGGAAGGGCTCCAATAGACCC  
CAACTGGAAAGGCTCTAATAGGCC  
CAACTGGAAAGGCTCTAATAGGCC  
CAACTGGAAAGGCTCTAATAGGCC  
CAACTGGAAAGGCTCCAATAGGCC  
CAACTGGAAAGGCTCCAATAGGCC  
CAACTGGAAAGGCTCTAATAGGCC  
TAACTGGCATGGCTCGAATCGACCG  
TAACTGGCATGGCTCGAATCGACCG  
TAACTGGCATGGCTCGAATCGACCG  
CAATTGGCATGTTTGAATCGACCA  
CAATTGGCATGGTTTGAATCGACCA  
CAATTGGCACGGTTTGAACCGACCA  
CAATTGGCACGGTTTGAACCGACCA  
CAATTGGCACGGTTTGAACCGACCA  
CAATTGGCATGGTTTGAACCGACCA  
CAACTGGCATGGTTTCAATCGACCT  
CAATTGGCATGGTTTGAATCGACCA  
CAATTGGCATGGTTTGAATCGACCT  
CAATTGGCATGGTTTGAATCGACCT

AJ404629\_H9N2\_A/Hong\_Kong/1073/99\_Hong\_Kong\_6\_(NA)  
CY087802\_H2N2\_A/Japan/305-MA12/1957\_Japan\_6\_(NA)  
CY032263\_H2N2\_A/Cottbus/1/1964\_Germany\_6\_(NA)  
CY080525\_H3N2\_A/Hong\_Kong/1-10-MA21-1/1968\_Hong\_Kong\_6\_(NA)  
CY118916\_H3N2\_A/Malaysia/1665090/2006\_Malaysia\_6\_(NA)  
CY113367\_H3N2\_A/Shanghai/11/1987\_China\_6\_(NA)  
CY112839\_H3N2\_A/Hong\_Kong/1/1997\_Hong\_Kong\_6\_(NA)  
JX046928\_H1N1\_A/Moscow/IIV-45/2012\_Russia\_6\_(NA)  
CY049989\_H1N1\_A/Mexico\_City/WR1087T/2009\_Mexico\_6\_(NA)  
GQ132138.1|\_H1N1\_A/Mexico/InDRE4114/2009  
CY021959\_H1N1\_A/New\_Jersey/1976\_USA\_6\_(NA)  
AF250356\_H1N1\_A/Brevig\_Mission/1/1918\_USA\_6\_(NA)  
CY013273\_H1N1\_A/Hickox/1940\_USA\_6\_(NA)  
CY009606\_H1N1\_A/Wilson-Smith/1933\_United\_Kingdom\_6\_(NA)  
CY045774\_H1N1\_A/Melbourne/1/1946\_Australia\_6\_(NA)  
CY020447\_H1N1\_A/Henry/1936\_USA\_6\_(NA)  
CY006669\_H1N1\_A/New\_York/493/2003\_USA\_6\_(NA)  
CY009342\_H1N1\_A/Malaysia/1954\_Malaysia\_6\_(NA)  
CY010374\_H1N1\_A/USSR/90/1977\_Russia\_6\_(NA)  
CY021039\_H1N1\_A/Christ's\_Hospital/157/1982\_United\_Kingdom\_6\_(NA)

GTGCTATATATAAAATGGG---AG  
 GTTATAGACATAAAATATGGA---AG  
 ATCATAGACATAAAATATGGA---AG  
 GTCGTAGACATAAAATATGGA---AG  
 ATCCGTAGATATAAACATAAA---GG  
 ATCGTAGATATAAAATGTGAA---AG  
 ATCGTAGATATAAAATGTGAA---AG  
 TGGGTGTCCTTTCAACCAGAATCTGG  
 TGGGTGTCCTTTCAACCAGAATCTGG  
 TGGGTGTCCTTTCAACCAGAATCTGG  
 TGGGTCTCTTTTCGATCAGAATCTGG  
 TGGGTGTCCTTTTCGATCAAAACCTGG  
 TGGGTGTCCTTTTCGATCAAAACCTGG  
 TGGGTGTCCTTTTCGATCAAAACCTGG  
 TGGGTGTCCTTTTCGATCAAAACCTGG  
 TGGGTGTCCTTTTCGATCAAAACCTGG  
 TGGGTGTCCTTTTAATCAAAACCTGG  
 TGGGTGTCCTTTTAATCAAAACCTGG  
 TGGGTGTCCTTTTAATCAAAACCTGG  
 TGGGTGTCCTTTTAATCAAAACCTGG



AJ404629\_H9N2\_A/Hong\_Kong/1073/99\_Hong\_Kong\_6\_(NA)  
 CY087802\_H2N2\_A/Japan/305-MA12/1957\_Japan\_6\_(NA)  
 CY032263\_H2N2\_A/Cottbus/1/1964\_Germany\_6\_(NA)  
 CY080525\_H3N2\_A/Hong\_Kong/1-10-MA21-1/1968\_Hong\_Kong\_6\_(NA)  
 CY118916\_H3N2\_A/Malaysia/1665090/2006\_Malaysia\_6\_(NA)  
 CY113367\_H3N2\_A/Shanghai/11/1987\_China\_6\_(NA)  
 CY112839\_H3N2\_A/Hong\_Kong/1/1997\_Hong\_Kong\_6\_(NA)  
 JX046928\_H1N1\_A/Moscow/IIV-45/2012\_Russia\_6\_(NA)  
 CY049989\_H1N1\_A/Mexico\_City/WR1087T/2009\_Mexico\_6\_(NA)  
 GQ132138.1|\_H1N1\_A/Mexico/InDRE4114/2009  
 CY021959\_H1N1\_A/New\_Jersey/1976\_USA\_6\_(NA)  
 AF250356\_H1N1\_A/Brevig\_Mission/1/1918\_USA\_6\_(NA)  
 CY013273\_H1N1\_A/Hickox/1940\_USA\_6\_(NA)  
 CY009606\_H1N1\_A/Wilson-Smith/1933\_United\_Kingdom\_6\_(NA)  
 CY045774\_H1N1\_A/Melbourne/1/1946\_Australia\_6\_(NA)  
 CY020447\_H1N1\_A/Henry/1936\_USA\_6\_(NA)  
 CY006669\_H1N1\_A/New\_York/493/2003\_USA\_6\_(NA)  
 CY009342\_H1N1\_A/Malaysia/1954\_Malaysia\_6\_(NA)  
 CY010374\_H1N1\_A/USSR/90/1977\_Russia\_6\_(NA)  
 CY021039\_H1N1\_A/Christ's\_Hospital/157/1982\_United\_Kingdom\_6\_(NA)

ATTATAGCTTGATTCTAGTTATGT  
ATTATAGCAATTGATTCAGTTATGT  
ATTATAGCAATTGATTCAGTTATGT  
ATTATAGCAATTGATTCAGTTATGT  
ATCATAGCAATTGTTCCAGTTATGT  
ATTATAGCAATTGTTCCAGTTATGT  
ATTATAGCAATTGTTCCAGTTATGT  
AATATCAGATAG-----GATACAT  
AATATCAGATAG-----GATACAT  
AATATCAGATAG-----GATACAT  
ATTATCAAATAG-----GGTACAT  
ATTATCAAATAG-----GGTACAT  
ATTATCAAATGG-----GATACAT  
ATTATCAAATAG-----GATACAT  
ATTATCAAATAG-----GATACAT  
ATTATCAAATAG-----GATACAT  
ATTATCAAATAG-----GATACAT  
ATTATCAAATAG-----GATACAT  
ATTATCAAATAG-----GATACAT

AJ404629\_H9N2\_A/Hong\_Kong/1073/99\_Hong\_Kong\_6\_(NA)  
CY087802\_H2N2\_A/Japan/305-MA12/1957\_Japan\_6\_(NA)  
CY032263\_H2N2\_A/Cottbus/1/1964\_Germany\_6\_(NA)  
CY080525\_H3N2\_A/Hong\_Kong/1-10-MA21-1/1968\_Hong\_Kong\_6\_(NA)  
CY118916\_H3N2\_A/Malaysia/1665090/2006\_Malaysia\_6\_(NA)  
CY113367\_H3N2\_A/Shanghai/11/1987\_China\_6\_(NA)  
CY112839\_H3N2\_A/Hong\_Kong/1/1997\_Hong\_Kong\_6\_(NA)  
JX046928\_H1N1\_A/Moscow/IIV-45/2012\_Russia\_6\_(NA)  
CY049989\_H1N1\_A/Mexico\_City/WR1087T/2009\_Mexico\_6\_(NA)  
GQ132138.1|\_H1N1\_A/Mexico/InDRE4114/2009  
CY021959\_H1N1\_A/New\_Jersey/1976\_USA\_6\_(NA)  
AF250356\_H1N1\_A/Brevig\_Mission/1/1918\_USA\_6\_(NA)  
CY013273\_H1N1\_A/Hickox/1940\_USA\_6\_(NA)  
CY009606\_H1N1\_A/Wilson-Smith/1933\_United\_Kingdom\_6\_(NA)  
CY045774\_H1N1\_A/Melbourne/1/1946\_Australia\_6\_(NA)  
CY020447\_H1N1\_A/Henry/1936\_USA\_6\_(NA)  
CY006669\_H1N1\_A/New\_York/493/2003\_USA\_6\_(NA)  
CY009342\_H1N1\_A/Malaysia/1954\_Malaysia\_6\_(NA)  
CY010374\_H1N1\_A/USSR/90/1977\_Russia\_6\_(NA)  
CY021039\_H1N1\_A/Christ's\_Hospital/157/1982\_United\_Kingdom\_6\_(NA)

Sequence logo for the 10bp motif. The y-axis represents information content in bits, ranging from 0 to 2. The x-axis shows positions 1 to 10. The sequence is GTGCTCAGGACTTGTGGGACACAA. The 'A' at position 3 and the 'G' at position 6 are highlighted in red, indicating they are the most conserved positions.

AJ404629\_H9N2\_A/Hong\_Kong/1073/99\_Hong\_Kong\_6\_(NA)  
CY087802\_H2N2\_A/Japan/305-MA12/1957\_Japan\_6\_(NA)  
CY032263\_H2N2\_A/Cottbus/1/1964\_Germany\_6\_(NA)  
CY080525\_H3N2\_A/Hong\_Kong/1-10-MA21-1/1968\_Hong\_Kong\_6\_(NA)  
CY118916\_H3N2\_A/Malaysia/1665090/2006\_Malaysia\_6\_(NA)  
CY113367\_H3N2\_A/Shanghai/11/1987\_China\_6\_(NA)  
CY112839\_H3N2\_A/Hong\_Kong/1/1997\_Hong\_Kong\_6\_(NA)  
JX046928\_H1N1\_A/Moscow/IIV-45/2012\_Russia\_6\_(NA)  
CY049989\_H1N1\_A/Mexico\_City/WR1087T/2009\_Mexico\_6\_(NA)  
GQ132138.1|\_H1N1\_A/Mexico/InDRE4114/2009  
CY021959\_H1N1\_A/New\_Jersey/1976\_USA\_6\_(NA)  
AF250356\_H1N1\_A/Brevig\_Mission/1/1918\_USA\_6\_(NA)  
CY013273\_H1N1\_A/Hickox/1940\_USA\_6\_(NA)  
CY009606\_H1N1\_A/Wilson-Smith/1933\_United\_Kingdom\_6\_(NA)  
CY045774\_H1N1\_A/Melbourne/1/1946\_Australia\_6\_(NA)  
CY020447\_H1N1\_A/Henry/1936\_USA\_6\_(NA)  
CY006669\_H1N1\_A/New\_York/493/2003\_USA\_6\_(NA)  
CY009342\_H1N1\_A/Malaysia/1954\_Malaysia\_6\_(NA)  
CY010374\_H1N1\_A/USSR/90/1977\_Russia\_6\_(NA)  
CY021039\_H1N1\_A/Christ's\_Hospital/157/1982\_United\_Kingdom\_6\_(NA)

CC AAGAAATGA CGATAGCTCCAGCA  
CCCAGGAACGACGACAGTCTTAGCA  
CCCAGAAACGACGACAGATCTTAGCA  
CCTAGAAACGACGACAGATCTTAGCA  
CCCAGAAAAAACGACAGCTCCAGCA  
CCCAGAAAAAACGACAGTCCAGCA  
CCCAGAAAAAMCGACAGTCCAGCA  
CCACGCCCTAATGATAAGACAGGCA  
CCACGCCCTAATGATAAGACAGGCA  
CCACGCCCTAATGATAAGACAGGCA  
CCGCGTTCCTAATGATGGGAAAGGCA  
CCGCGTCCCAAAAGATGGAAACAGGCA  
CCGCGTCCCAAAAGATGGAAAGGCA  
CCGCGTCCCAAAAGATGGAAACAGGCA  
CCGCGTCCCAAAAGATGGAAACAGGCA  
CCGCGTCCCAAAAGATGGAAACAGGCA  
CCGCGTCCCAAAAGATGGAAAGGCA  
CCGCGTCCCAAAAGATGGAAAGGCA  
CCGCGTCCCAAAAGATGGAAAGGCA  
CCGCGTCCCAAAAGATGGAAAGGCA

AJ404629\_H9N2\_A/Hong\_Kong/1073/99\_Hong\_Kong\_6\_(NA)  
CY087802\_H2N2\_A/Japan/305-MA12/1957\_Japan\_6\_(NA)  
CY032263\_H2N2\_A/Cottbus/1/1964\_Germany\_6\_(NA)  
CY080525\_H3N2\_A/Hong\_Kong/1-10-MA21-1/1968\_Hong\_Kong\_6\_(NA)  
CY118916\_H3N2\_A/Malaysia/1665090/2006\_Malaysia\_6\_(NA)  
CY113367\_H3N2\_A/Shanghai/11/1987\_China\_6\_(NA)  
CY112839\_H3N2\_A/Hong\_Kong/1/1997\_Hong\_Kong\_6\_(NA)  
JX046928\_H1N1\_A/Moscow/IIV-45/2012\_Russia\_6\_(NA)  
CY049989\_H1N1\_A/Mexico\_City/WR1087T/2009\_Mexico\_6\_(NA)  
GQ132138.1|\_H1N1\_A/Mexico/InDRE4114/2009  
CY021959\_H1N1\_A/New\_Jersey/1976\_USA\_6\_(NA)  
AF250356\_H1N1\_A/Brevig\_Mission/1/1918\_USA\_6\_(NA)  
CY013273\_H1N1\_A/Hickox/1940\_USA\_6\_(NA)  
CY009606\_H1N1\_A/Wilson-Smith/1933\_United\_Kingdom\_6\_(NA)  
CY045774\_H1N1\_A/Melbourne/1/1946\_Australia\_6\_(NA)  
CY020447\_H1N1\_A/Henry/1936\_USA\_6\_(NA)  
CY006669\_H1N1\_A/New\_York/493/2003\_USA\_6\_(NA)  
CY009342\_H1N1\_A/Malaysia/1954\_Malaysia\_6\_(NA)  
CY010374\_H1N1\_A/USSR/90/1977\_Russia\_6\_(NA)  
CY021039\_H1N1\_A/Christ's\_Hospital/157/1982\_United\_Kingdom\_6\_(NA)

G C A G T A A C T G C A G G G A T C C T A A T A A  
 A T A G C A A A A G C A G G G A T C C T A A C A A  
 A T A G C A A T T G C A G G A A T C C T A A C A A  
 A T A G C A A T T G C A G G A A T C C T A A C A A  
 G T A G C A A T T G T T T G G A T C C T A A C A A  
 G T A G C T A A T T G C C G G A A T C C T A A C A A  
 G T A G C T A A T T G C C T G G A T C C T A A C A A  
 G T T G T G G T C C A G T A T C G T C T A A T G G  
 G T T G T G G T C C A G T A T C G T C T A A T G G  
 G T T G T G G T C C A G T A T C G T C T A A T G G  
 A T T G T G G C C C A G T A C T T T C T A A T G G  
 G C T G T G G T C C A G T G C T T T C T A A T G G  
 G C T G T G G T C C A G T G T A T G T T G A T G G  
 G C T G T G G C C C A G T G T C T G C T G A T G G  
 G C T G T G G T C C A G T G C T G T T G A T G G  
 G C T G T G G T C C A G T G T A T G T T G A T G G  
 G C T G T A A T C C A G T G A C T G T T G A T G G  
 G C T G T G A T C C A G T A A A T G T T G A T G G  
 G T T G T G A T C C A G T A A A T G T T G A T G G  
 G C T G T G A T C C A G T A A C T G T T G A T G G

AJ404629\_H9N2\_A/Hong\_Kong/1073/99\_Hong\_Kong\_6\_(NA)  
CY087802\_H2N2\_A/Japan/305-MA12/1957\_Japan\_6\_(NA)  
CY032263\_H2N2\_A/Cottbus/1/1964\_Germany\_6\_(NA)  
CY080525\_H3N2\_A/Hong\_Kong/1-10-MA21-1/1968\_Hong\_Kong\_6\_(NA)  
CY118916\_H3N2\_A/Malaysia/1665090/2006\_Malaysia\_6\_(NA)  
CY113367\_H3N2\_A/Shanghai/11/1987\_China\_6\_(NA)  
CY112839\_H3N2\_A/Hong\_Kong/1/1997\_Hong\_Kong\_6\_(NA)  
JX046928\_H1N1\_A/Moscow/IIV-45/2012\_Russia\_6\_(NA)  
CY049989\_H1N1\_A/Mexico\_City/WR1087T/2009\_Mexico\_6\_(NA)  
GQ132138.1|\_H1N1\_A/Mexico/InDRE4114/2009  
CY021959\_H1N1\_A/New\_Jersey/1976\_USA\_6\_(NA)  
AF250356\_H1N1\_A/Brevig\_Mission/1/1918\_USA\_6\_(NA)  
CY013273\_H1N1\_A/Hickox/1940\_USA\_6\_(NA)  
CY009606\_H1N1\_A/Wilson-Smith/1933\_United\_Kingdom\_6\_(NA)  
CY045774\_H1N1\_A/Melbourne/1/1946\_Australia\_6\_(NA)  
CY020447\_H1N1\_A/Henry/1936\_USA\_6\_(NA)  
CY006669\_H1N1\_A/New\_York/493/2003\_USA\_6\_(NA)  
CY009342\_H1N1\_A/Malaysia/1954\_Malaysia\_6\_(NA)  
CY010374\_H1N1\_A/USSR/90/1977\_Russia\_6\_(NA)  
CY021039\_H1N1\_A/Christ's\_Hospital/157/1982\_United\_Kingdom\_6\_(NA)

CGAGAGAGGGGGCCAGGAGTGAAA  
 TGAGAGAGGGGAATCCAGGAGTGAAA  
 TGAGAGAGGGGAATCCAGGAGTGAAA  
 TGAGAGAGGGGAATCAAGGAGTGAAA  
 TGAAGAAGGTGGTCATGGAGTGAAA  
 TGAAGAAAGGGAGTCATGGAGTGAAA  
 TGAGGAAGGGGGTCATGGAGTGAAA  
 AGCAAA-----TGGAGTAAAA  
 AGCAAA-----TGGAGTAAAA  
 AGCAAA-----TGGAGTAAAA  
 AGCAAA-----TGGAGTGAAG  
 AGCAAA-----CGGAGTAAAG  
 AGCAAA-----CGGAGTAAAG  
 AGCAAA-----CGGAGTGAAG  
 AGCAAA-----CGGAGTAAAG  
 AGCAGACGGAGTTAAAG  
 AGCAGACGGAGTAAAG  
 AGCAGACGGAGTAAAG  
 AGCAGACGGAGTAAAG

AJ404629\_H9N2\_A/Hong\_Kong/1073/99\_Hong\_Kong\_6\_(NA)  
CY087802\_H2N2\_A/Japan/305-MA12/1957\_Japan\_6\_(NA)  
CY032263\_H2N2\_A/Cottbus/1/1964\_Germany\_6\_(NA)  
CY080525\_H3N2\_A/Hong\_Kong/1-10-MA21-1/1968\_Hong\_Kong\_6\_(NA)  
CY118916\_H3N2\_A/Malaysia/1665090/2006\_Malaysia\_6\_(NA)  
CY113367\_H3N2\_A/Shanghai/11/1987\_China\_6\_(NA)  
CY112839\_H3N2\_A/Hong\_Kong/1/1997\_Hong\_Kong\_6\_(NA)  
JX046928\_H1N1\_A/Moscow/IIV-45/2012\_Russia\_6\_(NA)  
CY049989\_H1N1\_A/Mexico\_City/WR1087T/2009\_Mexico\_6\_(NA)  
GQ132138.1|\_H1N1\_A/Mexico/InDRE4114/2009  
CY021959\_H1N1\_A/New\_Jersey/1976\_USA\_6\_(NA)  
AF250356\_H1N1\_A/Brevig\_Mission/1/1918\_USA\_6\_(NA)  
CY013273\_H1N1\_A/Hickox/1940\_USA\_6\_(NA)  
CY009606\_H1N1\_A/Wilson-Smith/1933\_United\_Kingdom\_6\_(NA)  
CY045774\_H1N1\_A/Melbourne/1/1946\_Australia\_6\_(NA)  
CY020447\_H1N1\_A/Henry/1936\_USA\_6\_(NA)  
CY006669\_H1N1\_A/New\_York/493/2003\_USA\_6\_(NA)  
CY009342\_H1N1\_A/Malaysia/1954\_Malaysia\_6\_(NA)  
CY010374\_H1N1\_A/USSR/90/1977\_Russia\_6\_(NA)  
CY021039\_H1N1\_A/Christ's\_Hospital/157/1982\_United\_Kingdom\_6\_(NA)

GGGCTGGGCGCTTTGACAATGGAAATG  
GGCTGGGCGCTTTGACAATGGAGATG  
GGCTGGGCGCTTTGACAATGGAGATG  
GGCTGGGCGCTTTGACAATGGAGATG  
GGCTGGGCGCTTTGATGATGGAAATG  
GGCTGGGCGCTTTGACGATGGAAATG  
GGCTGGGCGCTTTGATGATGGAAATG  
GGATTTTTCATTCAAATACGGCAATG  
GGATTTTTCATTCAAATACGGCAATG  
GGATTTTTCATTCAAATACGGCAATG  
GGGTTTTTCATTAGATATGGCAATG  
GGATTTTTCATTAGGTATGGTAATG  
GGATTTTTCATATAGGTATGGTAATG  
GGATTTTTCATATAGGTATGGTAATG  
GGATTTTTCATATAGGTATGGTAATG  
GGATTTTTCATATAGGTATGGTAATG  
GGGTTTTTCATACAAATATGGTAATG  
GGGTTTTTCATACAGGTATGGTAATG  
GGGTTTTTCATACAGGTATGGTAATG  
GGGTTTTTCATACAGGTATGGTAATG

AJ404629\_H9N2\_A/Hong\_Kong/1073/99\_Hong\_Kong\_6\_(NA)  
CY087802\_H2N2\_A/Japan/305-MA12/1957\_Japan\_6\_(NA)  
CY032263\_H2N2\_A/Cottbus/1/1964\_Germany\_6\_(NA)  
CY080525\_H3N2\_A/Hong\_Kong/1-10-MA21-1/1968\_Hong\_Kong\_6\_(NA)  
CY118916\_H3N2\_A/Malaysia/1665090/2006\_Malaysia\_6\_(NA)  
CY113367\_H3N2\_A/Shanghai/11/1987\_China\_6\_(NA)  
CY112839\_H3N2\_A/Hong\_Kong/1/1997\_Hong\_Kong\_6\_(NA)  
JX046928\_H1N1\_A/Moscow/IIV-45/2012\_Russia\_6\_(NA)  
CY049989\_H1N1\_A/Mexico\_City/WR1087T/2009\_Mexico\_6\_(NA)  
GQ132138.1|\_H1N1\_A/Mexico/InDRE4114/2009  
CY021959\_H1N1\_A/New\_Jersey/1976\_USA\_6\_(NA)  
AF250356\_H1N1\_A/Brevig\_Mission/1/1918\_USA\_6\_(NA)  
CY013273\_H1N1\_A/Hickox/1940\_USA\_6\_(NA)  
CY009606\_H1N1\_A/Wilson-Smith/1933\_United\_Kingdom\_6\_(NA)  
CY045774\_H1N1\_A/Melbourne/1/1946\_Australia\_6\_(NA)  
CY020447\_H1N1\_A/Henry/1936\_USA\_6\_(NA)  
CY006669\_H1N1\_A/New\_York/493/2003\_USA\_6\_(NA)  
CY009342\_H1N1\_A/Malaysia/1954\_Malaysia\_6\_(NA)  
CY010374\_H1N1\_A/USSR/90/1977\_Russia\_6\_(NA)  
CY021039\_H1N1\_A/Christ's\_Hospital/157/1982\_United\_Kingdom\_6\_(NA)

Sequence logo for the 10bp motif. The y-axis represents information content in bits (0.00 to 0.40). The x-axis shows positions 1 to 10. The logo shows a strong preference for 'A' at position 1, 'G' at position 2, 'T' at position 3, 'G' at position 4, 'G' at position 5, 'A' at position 6, 'A' at position 7, 'C' at position 8, 'A' at position 9, and 'A' at position 10.

| Position | A    | C    | G    | T    |
|----------|------|------|------|------|
| 1        | 0.38 | 0.02 | 0.02 | 0.02 |
| 2        | 0.02 | 0.02 | 0.38 | 0.02 |
| 3        | 0.02 | 0.02 | 0.38 | 0.02 |
| 4        | 0.02 | 0.02 | 0.38 | 0.02 |
| 5        | 0.02 | 0.02 | 0.38 | 0.02 |
| 6        | 0.38 | 0.02 | 0.02 | 0.02 |
| 7        | 0.38 | 0.02 | 0.02 | 0.02 |
| 8        | 0.02 | 0.38 | 0.02 | 0.02 |
| 9        | 0.38 | 0.02 | 0.02 | 0.02 |
| 10       | 0.38 | 0.02 | 0.02 | 0.02 |

AJ404629\_H9N2\_A/Hong\_Kong/1073/99\_Hong\_Kong\_6\_(NA)  
CY087802\_H2N2\_A/Japan/305-MA12/1957\_Japan\_6\_(NA)  
CY032263\_H2N2\_A/Cottbus/1/1964\_Germany\_6\_(NA)  
CY080525\_H3N2\_A/Hong\_Kong/1-10-MA21-1/1968\_Hong\_Kong\_6\_(NA)  
CY118916\_H3N2\_A/Malaysia/1665090/2006\_Malaysia\_6\_(NA)  
CY113367\_H3N2\_A/Shanghai/11/1987\_China\_6\_(NA)  
CY112839\_H3N2\_A/Hong\_Kong/1/1997\_Hong\_Kong\_6\_(NA)  
JX046928\_H1N1\_A/Moscow/IIV-45/2012\_Russia\_6\_(NA)  
CY049989\_H1N1\_A/Mexico\_City/WR1087T/2009\_Mexico\_6\_(NA)  
GQ132138.1|\_H1N1\_A/Mexico/InDRE4114/2009  
CY021959\_H1N1\_A/New\_Jersey/1976\_USA\_6\_(NA)  
AF250356\_H1N1\_A/Brevig\_Mission/1/1918\_USA\_6\_(NA)  
CY013273\_H1N1\_A/Hickox/1940\_USA\_6\_(NA)  
CY009606\_H1N1\_A/Wilson-Smith/1933\_United\_Kingdom\_6\_(NA)  
CY045774\_H1N1\_A/Melbourne/1/1946\_Australia\_6\_(NA)  
CY020447\_H1N1\_A/Henry/1936\_USA\_6\_(NA)  
CY006669\_H1N1\_A/New\_York/493/2003\_USA\_6\_(NA)  
CY009342\_H1N1\_A/Malaysia/1954\_Malaysia\_6\_(NA)  
CY010374\_H1N1\_A/USSR/90/1977\_Russia\_6\_(NA)  
CY021039\_H1N1\_A/Christ's\_Hospital/157/1982\_United\_Kingdom\_6\_(NA)

GAAAGATTTCGGCTCTGGTTATGAG  
CAAAGATTTCACGCTCAGGTTATGAA  
CAAGGATTTTACGCTCAGGTTATGAA  
CAAGGATTTTACGCTCAGGTTATGAA  
CGAGAAGTTCACGCTTAGGATATGAA  
AGAGGAGTTTACGCTCAGGTTATGAA  
CGAGAAGTTTACGCTCAGGTTATGAA  
CATTAGTTCAAGAAAAGCTTTT GAG  
CATTAGTTCAAGAAACGGTTTTT GAG  
CATTAGTTCAAGAAACGGTTTTT GAG  
TATCAGCTCTAGAAGTGGATTT GAG  
TACCAGTTCCGAGAAGCGGGTTT GAG  
TAACAGTTCCAGACAGGGGTTT GAG  
TGACAGTTCCAGACATGGGTTT GAG  
TCAAAAGTTCCAGACATGGGTTT GAG  
TAACAGTTCCAGACATGGGTTT GAG  
TAACAGCTTAGAAAAGGGGTTT GAG  
TAACAGTTCCGAAAAGGGGTTT GAG  
TAACAGCTCCGAAAAGGGATTT GAG  
TAAACAGCTCCGAAAAGGGATTT GAG

AJ404629\_H9N2\_A/Hong\_Kong/1073/99\_Hong\_Kong\_6\_(NA)  
CY087802\_H2N2\_A/Japan/305-MA12/1957\_Japan\_6\_(NA)  
CY032263\_H2N2\_A/Cottbus/1/1964\_Germany\_6\_(NA)  
CY080525\_H3N2\_A/Hong\_Kong/1-10-MA21-1/1968\_Hong\_Kong\_6\_(NA)  
CY118916\_H3N2\_A/Malaysia/1665090/2006\_Malaysia\_6\_(NA)  
CY113367\_H3N2\_A/Shanghai/11/1987\_China\_6\_(NA)  
CY112839\_H3N2\_A/Hong\_Kong/1/1997\_Hong\_Kong\_6\_(NA)  
JX046928\_H1N1\_A/Moscow/IIV-45/2012\_Russia\_6\_(NA)  
CY049989\_H1N1\_A/Mexico\_City/WR1087T/2009\_Mexico\_6\_(NA)  
GQ132138.1|\_H1N1\_A/Mexico/InDRE4114/2009  
CY021959\_H1N1\_A/New\_Jersey/1976\_USA\_6\_(NA)  
AF250356\_H1N1\_A/Brevig\_Mission/1/1918\_USA\_6\_(NA)  
CY013273\_H1N1\_A/Hickox/1940\_USA\_6\_(NA)  
CY009606\_H1N1\_A/Wilson-Smith/1933\_United\_Kingdom\_6\_(NA)  
CY045774\_H1N1\_A/Melbourne/1/1946\_Australia\_6\_(NA)  
CY020447\_H1N1\_A/Henry/1936\_USA\_6\_(NA)  
CY006669\_H1N1\_A/New\_York/493/2003\_USA\_6\_(NA)  
CY009342\_H1N1\_A/Malaysia/1954\_Malaysia\_6\_(NA)  
CY010374\_H1N1\_A/USSR/90/1977\_Russia\_6\_(NA)  
CY021039\_H1N1\_A/Christ's\_Hospital/157/1982\_United\_Kingdom\_6\_(NA)

1201

AJ404629\_H9N2\_A/Hong\_Kong/1073/99\_Hong\_Kong\_6\_(NA)  
 CY087802\_H2N2\_A/Japan/305-MA12/1957\_Japan\_6\_(NA)  
 CY032263\_H2N2\_A/Cottbus/1/1964\_Germany\_6\_(NA)  
 CY080525\_H3N2\_A/Hong\_Kong/1-10-MA21-1/1968\_Hong\_Kong\_6\_(NA)  
 CY118916\_H3N2\_A/Malaysia/1665090/2006\_Malaysia\_6\_(NA)  
 CY113367\_H3N2\_A/Shanghai/11/1987\_China\_6\_(NA)  
 CY112839\_H3N2\_A/Hong\_Kong/1/1997\_Hong\_Kong\_6\_(NA)  
 JX046928\_H1N1\_A/Moscow/IIV-45/2012\_Russia\_6\_(NA)  
 CY049989\_H1N1\_A/Mexico\_City/WR1087T/2009\_Mexico\_6\_(NA)  
 GQ132138.1|\_H1N1\_A/Mexico/InDRE4114/2009  
 CY021959\_H1N1\_A/New\_Jersey/1976\_USA\_6\_(NA)  
 AF250356\_H1N1\_A/Brevig\_Mission/1/1918\_USA\_6\_(NA)  
 CY013273\_H1N1\_A/Hickox/1940\_USA\_6\_(NA)  
 CY009606\_H1N1\_A/Wilson-Smith/1933\_United\_Kingdom\_6\_(NA)  
 CY045774\_H1N1\_A/Melbourne/1/1946\_Australia\_6\_(NA)  
 CY020447\_H1N1\_A/Henry/1936\_USA\_6\_(NA)  
 CY006669\_H1N1\_A/New\_York/493/2003\_USA\_6\_(NA)  
 CY009342\_H1N1\_A/Malaysia/1954\_Malaysia\_6\_(NA)  
 CY010374\_H1N1\_A/USSR/90/1977\_Russia\_6\_(NA)  
 CY021039\_H1N1\_A/Christ's\_Hospital/157/1982\_United\_Kingdom\_6\_(NA)

CTACGGCTAATTCCAAGTCACAAAT  
 CCACACCTAATTCCAATTCGCAGGT  
 CCACACCTAATTCCAATTCGCAGAT  
 CCACACCTAATTCCAATTCGCAGAT  
 CCAACCCCTAATTCCAATTCGCAGAT  
 CCACACCTAATTCCAATTCGCAGAT  
 CCAACCCCTAATTCCAATTCGCAGAT  
 CTGGGACAGACAATAGCTTCTCAAT  
 CTGGGACAGACAATAACTTCTCAAT  
 CTGGGACAGACAATAACTTCTCAAT  
 CAGAAACTGATAGTAGTTTCTCTAT  
 CAGAGACTGATAGTAGTTTCTCTGT  
 CAGAGACTGATAGTAGTTTCTCTGT  
 CAGAGACTGATAGTAGTTTCTCTGT  
 CAGAGACTGATAGTAGTTTCTCTGT  
 CAGAGACTGATAGTAGTTTCTCTGT  
 CAGATACCGATGATAATTTCTTAGT  
 CAGATACCGATGATAATTTCTTAGT  
 CCGATACCGATGATAATTTCTTAGT

1226

AJ404629\_H9N2\_A/Hong\_Kong/1073/99\_Hong\_Kong\_6\_(NA)  
 CY087802\_H2N2\_A/Japan/305-MA12/1957\_Japan\_6\_(NA)  
 CY032263\_H2N2\_A/Cottbus/1/1964\_Germany\_6\_(NA)  
 CY080525\_H3N2\_A/Hong\_Kong/1-10-MA21-1/1968\_Hong\_Kong\_6\_(NA)  
 CY118916\_H3N2\_A/Malaysia/1665090/2006\_Malaysia\_6\_(NA)  
 CY113367\_H3N2\_A/Shanghai/11/1987\_China\_6\_(NA)  
 CY112839\_H3N2\_A/Hong\_Kong/1/1997\_Hong\_Kong\_6\_(NA)  
 JX046928\_H1N1\_A/Moscow/IIV-45/2012\_Russia\_6\_(NA)  
 CY049989\_H1N1\_A/Mexico\_City/WR1087T/2009\_Mexico\_6\_(NA)  
 GQ132138.1|\_H1N1\_A/Mexico/InDRE4114/2009  
 CY021959\_H1N1\_A/New\_Jersey/1976\_USA\_6\_(NA)  
 AF250356\_H1N1\_A/Brevig\_Mission/1/1918\_USA\_6\_(NA)  
 CY013273\_H1N1\_A/Hickox/1940\_USA\_6\_(NA)  
 CY009606\_H1N1\_A/Wilson-Smith/1933\_United\_Kingdom\_6\_(NA)  
 CY045774\_H1N1\_A/Melbourne/1/1946\_Australia\_6\_(NA)  
 CY020447\_H1N1\_A/Henry/1936\_USA\_6\_(NA)  
 CY006669\_H1N1\_A/New\_York/493/2003\_USA\_6\_(NA)  
 CY009342\_H1N1\_A/Malaysia/1954\_Malaysia\_6\_(NA)  
 CY010374\_H1N1\_A/USSR/90/1977\_Russia\_6\_(NA)  
 CY021039\_H1N1\_A/Christ's\_Hospital/157/1982\_United\_Kingdom\_6\_(NA)

AAATAGGCAAGTCATAGTTGACAGT  
 CAATAGACAGGTCATAGTTGACAAC  
 CAATAGACAGGTCATAGTTGACAGC  
 CAATAGACAGGTCATAGTTGACAGC  
 AAATAGGCAAGTCATAGTTGACAGA  
 AAATAGGCAAGTCATAGTTGACAGC  
 AAATAGGCAAGTCATAGTTGACAGA  
 AAA---GCAAGATATCGTAGGAATA  
 AAA---GCAAGATATCGTAGGAATA  
 AAA---GCAAGATATCGTAGGAATA  
 GAA---GCAAGATATTATAGCATTA  
 GAG---ACAAGATATTGTAGCAATA  
 GAA---ACAAGATGTAGTGGCAGTA  
 GAG---ACAAGATGTGTGGCAATG  
 GAG---ACAAGATGTGTGGCAATG  
 GAG---ACAAGATGTGTGGCAATG  
 GAA---ACAGGATGTGTGGCAATA  
 GAA---ACAGGATGTAGTGGCAATG  
 GAA---ACAGGATGTAGTGGCAATG  
 GAA---ACAGGATGTAGTGGCAATG

1251

AJ404629\_H9N2\_A/Hong\_Kong/1073/99\_Hong\_Kong\_6\_(NA)  
 CY087802\_H2N2\_A/Japan/305-MA12/1957\_Japan\_6\_(NA)  
 CY032263\_H2N2\_A/Cottbus/1/1964\_Germany\_6\_(NA)  
 CY080525\_H3N2\_A/Hong\_Kong/1-10-MA21-1/1968\_Hong\_Kong\_6\_(NA)  
 CY118916\_H3N2\_A/Malaysia/1665090/2006\_Malaysia\_6\_(NA)  
 CY113367\_H3N2\_A/Shanghai/11/1987\_China\_6\_(NA)  
 CY112839\_H3N2\_A/Hong\_Kong/1/1997\_Hong\_Kong\_6\_(NA)  
 JX046928\_H1N1\_A/Moscow/IIV-45/2012\_Russia\_6\_(NA)  
 CY049989\_H1N1\_A/Mexico\_City/WR1087T/2009\_Mexico\_6\_(NA)  
 GQ132138.1|\_H1N1\_A/Mexico/InDRE4114/2009  
 CY021959\_H1N1\_A/New\_Jersey/1976\_USA\_6\_(NA)  
 AF250356\_H1N1\_A/Brevig\_Mission/1/1918\_USA\_6\_(NA)  
 CY013273\_H1N1\_A/Hickox/1940\_USA\_6\_(NA)  
 CY009606\_H1N1\_A/Wilson-Smith/1933\_United\_Kingdom\_6\_(NA)  
 CY045774\_H1N1\_A/Melbourne/1/1946\_Australia\_6\_(NA)  
 CY020447\_H1N1\_A/Henry/1936\_USA\_6\_(NA)  
 CY006669\_H1N1\_A/New\_York/493/2003\_USA\_6\_(NA)  
 CY009342\_H1N1\_A/Malaysia/1954\_Malaysia\_6\_(NA)  
 CY010374\_H1N1\_A/USSR/90/1977\_Russia\_6\_(NA)  
 CY021039\_H1N1\_A/Christ's\_Hospital/157/1982\_United\_Kingdom\_6\_(NA)

GATAACTGGTCTGGGTATTCTGGTA  
 AATAATTGGTCTGGGTACTCTGGTA  
 AATAATTGGTCAGGTTACTCTGGTA  
 GATAACTGGTCAGGTTACTCTGGTA  
 GGTAATAGGTCGGGTTATTCTGGTA  
 GGTAATAGGTCGGGTTATTCTGGTA  
 GGTAATAGGTCGGGTTATTCTGGTA  
 AATGAGTGGTCAGGATATAGCGGGA  
 AATGAGTGGTCAGGATATAGCGGGA  
 ACTGATTGGTCGGGATACAGTGGAA  
 ACTGATTGGTCGGGGTACAGCGGGA  
 ACCGATTGGTCAGGGTACAGCGGAA  
 ACTGATCGGTCAGGGTACAGCGGAA  
 ACTGATTGGTCAGGGTACAGCGGAA  
 ACTGATTGGTCAGGGTATAGCGGAA  
 ACTGATTGGTCAGGGTATAGCGGAA  
 ACTGATTGGTCAGGGTATAGCGGAA  
 ACTGATTGGTCAGGGTATAGCGGAA

AJ404629\_H9N2\_A/Hong\_Kong/1073/99\_Hong\_Kong\_6\_(NA)  
CY087802\_H2N2\_A/Japan/305-MA12/1957\_Japan\_6\_(NA)  
CY032263\_H2N2\_A/Cottbus/1/1964\_Germany\_6\_(NA)  
CY080525\_H3N2\_A/Hong\_Kong/1-10-MA21-1/1968\_Hong\_Kong\_6\_(NA)  
CY118916\_H3N2\_A/Malaysia/1665090/2006\_Malaysia\_6\_(NA)  
CY113367\_H3N2\_A/Shanghai/11/1987\_China\_6\_(NA)  
CY112839\_H3N2\_A/Hong\_Kong/1/1997\_Hong\_Kong\_6\_(NA)  
JX046928\_H1N1\_A/Moscow/IIV-45/2012\_Russia\_6\_(NA)  
CY049989\_H1N1\_A/Mexico\_City/WR1087T/2009\_Mexico\_6\_(NA)  
GQ132138.1|\_H1N1\_A/Mexico/InDRE4114/2009  
CY021959\_H1N1\_A/New\_Jersey/1976\_USA\_6\_(NA)  
AF250356\_H1N1\_A/Brevig\_Mission/1/1918\_USA\_6\_(NA)  
CY013273\_H1N1\_A/Hickox/1940\_USA\_6\_(NA)  
CY009606\_H1N1\_A/Wilson-Smith/1933\_United\_Kingdom\_6\_(NA)  
CY045774\_H1N1\_A/Melbourne/1/1946\_Australia\_6\_(NA)  
CY020447\_H1N1\_A/Henry/1936\_USA\_6\_(NA)  
CY006669\_H1N1\_A/New\_York/493/2003\_USA\_6\_(NA)  
CY009342\_H1N1\_A/Malaysia/1954\_Malaysia\_6\_(NA)  
CY010374\_H1N1\_A/USSR/90/1977\_Russia\_6\_(NA)  
CY021039\_H1N1\_A/Christ's\_Hospital/157/1982\_United\_Kingdom\_6\_(NA)

Sequence logo for the 10bp motif. The y-axis represents information content in bits (0.00 to 0.30). The x-axis shows positions 1 to 10. The logo shows a strong preference for T at position 1, G at position 2, T at position 3, C at position 4, A at position 5, A at position 6, C at position 7, T at position 8, C at position 9, and A at position 10. The background is color-coded by base: T (blue), G (green), C (yellow), A (red).

AJ404629\_H9N2\_A/Hong\_Kong/1073/99\_Hong\_Kong\_6\_(NA)  
CY087802\_H2N2\_A/Japan/305-MA12/1957\_Japan\_6\_(NA)  
CY032263\_H2N2\_A/Cottbus/1/1964\_Germany\_6\_(NA)  
CY080525\_H3N2\_A/Hong\_Kong/1-10-MA21-1/1968\_Hong\_Kong\_6\_(NA)  
CY118916\_H3N2\_A/Malaysia/1665090/2006\_Malaysia\_6\_(NA)  
CY113367\_H3N2\_A/Shanghai/11/1987\_China\_6\_(NA)  
CY112839\_H3N2\_A/Hong\_Kong/1/1997\_Hong\_Kong\_6\_(NA)  
JX046928\_H1N1\_A/Moscow/IIV-45/2012\_Russia\_6\_(NA)  
CY049989\_H1N1\_A/Mexico\_City/WR1087T/2009\_Mexico\_6\_(NA)  
GQ132138.1|\_H1N1\_A/Mexico/InDRE4114/2009  
CY021959\_H1N1\_A/New\_Jersey/1976\_USA\_6\_(NA)  
AF250356\_H1N1\_A/Brevig\_Mission/1/1918\_USA\_6\_(NA)  
CY013273\_H1N1\_A/Hickox/1940\_USA\_6\_(NA)  
CY009606\_H1N1\_A/Wilson-Smith/1933\_United\_Kingdom\_6\_(NA)  
CY045774\_H1N1\_A/Melbourne/1/1946\_Australia\_6\_(NA)  
CY020447\_H1N1\_A/Henry/1936\_USA\_6\_(NA)  
CY006669\_H1N1\_A/New\_York/493/2003\_USA\_6\_(NA)  
CY009342\_H1N1\_A/Malaysia/1954\_Malaysia\_6\_(NA)  
CY010374\_H1N1\_A/USSR/90/1977\_Russia\_6\_(NA)  
CY021039\_H1N1\_A/Christ's\_Hospital/157/1982\_United\_Kingdom\_6\_(NA)

AGGAAAA CCGCAT CAACAG GGTGT  
 GGGAAAA AGCTGC ATCAAT AGGTGC  
 GGGAAAA AGCTGC ATCAAT AGGTGC  
 GGGAAAA AGCTGC ATCAAT AGGTGC  
 AGGAAAA GCTGC ATCAAT CCGTGC  
 GGGAAAA AGCTGC ATCAAT CCGTGC  
 AGGAAAA GCTGC ATCAAT CCGTGC  
 AGGGG CTGGACTG TATAAG ACCTTGC  
 AGGGG CTGGATTG TATAAG ACCTTGC  
 AGGGG CTGGATTG TATAAG ACCTTGC  
 AGGAAT GAACCTG ATAAGG CCCTTGC  
 AGGGG CTGGACTG ATGAGG CCCTTGC  
 AGGGG CTGGACTG ATGAGG CCCTTGC  
 AGGGG CTAGACTG TATGAG GCCCTTGC  
 AGGGG CTAGACTG TATGAG GCCCTTGC  
 AGGGG CTAGACTG TATGAG GCCCTTGC  
 AGGAT TGGACTG TATGAG CCCTTGC  
 AGGAT TGGACTG TATGAG CCCTTGC  
 AGGAT TGGACTG TATGAG CCCTTGC

AJ404629\_H9N2\_A/Hong\_Kong/1073/99\_Hong\_Kong\_6\_(NA)  
CY087802\_H2N2\_A/Japan/305-MA12/1957\_Japan\_6\_(NA)  
CY032263\_H2N2\_A/Cottbus/1/1964\_Germany\_6\_(NA)  
CY080525\_H3N2\_A/Hong\_Kong/1-10-MA21-1/1968\_Hong\_Kong\_6\_(NA)  
CY118916\_H3N2\_A/Malaysia/1665090/2006\_Malaysia\_6\_(NA)  
CY113367\_H3N2\_A/Shanghai/11/1987\_China\_6\_(NA)  
CY112839\_H3N2\_A/Hong\_Kong/1/1997\_Hong\_Kong\_6\_(NA)  
JX046928\_H1N1\_A/Moscow/IIV-45/2012\_Russia\_6\_(NA)  
CY049989\_H1N1\_A/Mexico\_City/WR1087T/2009\_Mexico\_6\_(NA)  
GQ132138.1|\_H1N1\_A/Mexico/InDRE4114/2009  
CY021959\_H1N1\_A/New\_Jersey/1976\_USA\_6\_(NA)  
AF250356\_H1N1\_A/Brevig\_Mission/1/1918\_USA\_6\_(NA)  
CY013273\_H1N1\_A/Hickox/1940\_USA\_6\_(NA)  
CY009606\_H1N1\_A/Wilson-Smith/1933\_United\_Kingdom\_6\_(NA)  
CY045774\_H1N1\_A/Melbourne/1/1946\_Australia\_6\_(NA)  
CY020447\_H1N1\_A/Henry/1936\_USA\_6\_(NA)  
CY006669\_H1N1\_A/New\_York/493/2003\_USA\_6\_(NA)  
CY009342\_H1N1\_A/Malaysia/1954\_Malaysia\_6\_(NA)  
CY010374\_H1N1\_A/USSR/90/1977\_Russia\_6\_(NA)  
CY021039\_H1N1\_A/Christ's\_Hospital/157/1982\_United\_Kingdom\_6\_(NA)

[illegible]



1351

AJ404629\_H9N2\_A/Hong\_Kong/1073/99\_Hong\_Kong\_6\_(NA)  
 CY087802\_H2N2\_A/Japan/305-MA12/1957\_Japan\_6\_(NA)  
 CY032263\_H2N2\_A/Cottbus/1/1964\_Germany\_6\_(NA)  
 CY080525\_H3N2\_A/Hong\_Kong/1-10-MA21-1/1968\_Hong\_Kong\_6\_(NA)  
 CY118916\_H3N2\_A/Malaysia/1665090/2006\_Malaysia\_6\_(NA)  
 CY113367\_H3N2\_A/Shanghai/11/1987\_China\_6\_(NA)  
 CY112839\_H3N2\_A/Hong\_Kong/1/1997\_Hong\_Kong\_6\_(NA)  
 JX046928\_H1N1\_A/Moscow/IIV-45/2012\_Russia\_6\_(NA)  
 CY049989\_H1N1\_A/Mexico\_City/WR1087T/2009\_Mexico\_6\_(NA)  
 GQ132138.1|\_H1N1\_A/Mexico/InDRE4114/2009  
 CY021959\_H1N1\_A/New\_Jersey/1976\_USA\_6\_(NA)  
 AF250356\_H1N1\_A/Brevig\_Mission/1/1918\_USA\_6\_(NA)  
 CY013273\_H1N1\_A/Hickox/1940\_USA\_6\_(NA)  
 CY009606\_H1N1\_A/Wilson-Smith/1933\_United\_Kingdom\_6\_(NA)  
 CY045774\_H1N1\_A/Melbourne/1/1946\_Australia\_6\_(NA)  
 CY020447\_H1N1\_A/Henry/1936\_USA\_6\_(NA)  
 CY006669\_H1N1\_A/New\_York/493/2003\_USA\_6\_(NA)  
 CY009342\_H1N1\_A/Malaysia/1954\_Malaysia\_6\_(NA)  
 CY010374\_H1N1\_A/USSR/90/1977\_Russia\_6\_(NA)  
 CY021039\_H1N1\_A/Christ's\_Hospital/157/1982\_United\_Kingdom\_6\_(NA)

GACCACAGGAGAGCAGAGTATGGTGG  
 GGCCACAGGAGACTAGAGTATGGTGG  
 GGCAACAGGAGACTAGAGTATGGTGG  
 GGAAACAGGAGACTAGAGTGTGGTGG  
 GAAAAGAGGAAATGAAGTCTTGTGG  
 GGGAAACAGGAAACTAGAGTCTGGTGG  
 GGAAACAGGAAACTGAAGTCTGGTGG  
 GACCCAAAGAGAAC---ACAATCTG  
 GACCCAAAGAGAAC---ACAATCTG  
 GACCCAAAGAGAAC---ACAATCTG  
 AACCCAAAGGAGAGC---ACAATCTG  
 AACCTAAAGAGAAT---ACAATCTG  
 GACCTAAAGAAAAT---ACAATCTG  
 GACCTGAGGAGGAA---ACAATCTG  
 AACCTAAAGAGAAA---ACAATCTG  
 GACCTAAAGAAAAC---ACAATCTG  
 TGCCTAGAGAAAAATACAACAATCTG  
 GACCCAGAGAAAAAACACAATCTG  
 GACCCAGAGAAAAAACACAATCTG  
 GACCTAGAGAAAGGACAACAATCTG

1376

AJ404629\_H9N2\_A/Hong\_Kong/1073/99\_Hong\_Kong\_6\_(NA)  
 CY087802\_H2N2\_A/Japan/305-MA12/1957\_Japan\_6\_(NA)  
 CY032263\_H2N2\_A/Cottbus/1/1964\_Germany\_6\_(NA)  
 CY080525\_H3N2\_A/Hong\_Kong/1-10-MA21-1/1968\_Hong\_Kong\_6\_(NA)  
 CY118916\_H3N2\_A/Malaysia/1665090/2006\_Malaysia\_6\_(NA)  
 CY113367\_H3N2\_A/Shanghai/11/1987\_China\_6\_(NA)  
 CY112839\_H3N2\_A/Hong\_Kong/1/1997\_Hong\_Kong\_6\_(NA)  
 JX046928\_H1N1\_A/Moscow/IIV-45/2012\_Russia\_6\_(NA)  
 CY049989\_H1N1\_A/Mexico\_City/WR1087T/2009\_Mexico\_6\_(NA)  
 GQ132138.1|\_H1N1\_A/Mexico/InDRE4114/2009  
 CY021959\_H1N1\_A/New\_Jersey/1976\_USA\_6\_(NA)  
 AF250356\_H1N1\_A/Brevig\_Mission/1/1918\_USA\_6\_(NA)  
 CY013273\_H1N1\_A/Hickox/1940\_USA\_6\_(NA)  
 CY009606\_H1N1\_A/Wilson-Smith/1933\_United\_Kingdom\_6\_(NA)  
 CY045774\_H1N1\_A/Melbourne/1/1946\_Australia\_6\_(NA)  
 CY020447\_H1N1\_A/Henry/1936\_USA\_6\_(NA)  
 CY006669\_H1N1\_A/New\_York/493/2003\_USA\_6\_(NA)  
 CY009342\_H1N1\_A/Malaysia/1954\_Malaysia\_6\_(NA)  
 CY010374\_H1N1\_A/USSR/90/1977\_Russia\_6\_(NA)  
 CY021039\_H1N1\_A/Christ's\_Hospital/157/1982\_United\_Kingdom\_6\_(NA)

GACTTCAAATAGCATCATTGTATT  
 GACCTCAAACAGTATTGTTGTGTTT  
 GACCTCAAACAGTATTGTTGTGTTT  
 GACCTCAAACAGTATTGTTGTGTTT  
 GACCTCAAACAGTATTGTTGTGTTT  
 GACCTCAAACAGTATTGTTGTGTTT  
 GACCTCAAACAGTATTGTTGTGTTT  
 GACTAGCGGGAGCAGCATATCCTTT  
 GACTAGCGGGAGCAGCATCTCCTTT  
 GACTAGCGGGAGCAGCATATCCTTT  
 GACTAGTGGAGCAGCATTTCTTTT  
 GACTAGTGGGAGCAGCATTTCTTTT  
 GACCCAGTGGGAGCAGCATTTCTTTT  
 GACTAGTGGGAGCATCATTTCTTTT  
 GACTAGTGGGAGCAGCATTTCTTTT  
 GACTAGTGGGAGCAGCATTTCTTTT  
 GACTAGTGGGAGCAGCATTTCTTTT  
 GACTAGTGGGAGCAGCATTTCTTTT  
 GACTAGTGGGAGCAGCATTTCTTTT  
 GACTAGTGGGAGCAGCATTTCTTTT  
 GACTAGTGGTACAGCATTTCTTTT

1401

AJ404629\_H9N2\_A/Hong\_Kong/1073/99\_Hong\_Kong\_6\_(NA)  
 CY087802\_H2N2\_A/Japan/305-MA12/1957\_Japan\_6\_(NA)  
 CY032263\_H2N2\_A/Cottbus/1/1964\_Germany\_6\_(NA)  
 CY080525\_H3N2\_A/Hong\_Kong/1-10-MA21-1/1968\_Hong\_Kong\_6\_(NA)  
 CY118916\_H3N2\_A/Malaysia/1665090/2006\_Malaysia\_6\_(NA)  
 CY113367\_H3N2\_A/Shanghai/11/1987\_China\_6\_(NA)  
 CY112839\_H3N2\_A/Hong\_Kong/1/1997\_Hong\_Kong\_6\_(NA)  
 JX046928\_H1N1\_A/Moscow/IIV-45/2012\_Russia\_6\_(NA)  
 CY049989\_H1N1\_A/Mexico\_City/WR1087T/2009\_Mexico\_6\_(NA)  
 GQ132138.1|\_H1N1\_A/Mexico/InDRE4114/2009  
 CY021959\_H1N1\_A/New\_Jersey/1976\_USA\_6\_(NA)  
 AF250356\_H1N1\_A/Brevig\_Mission/1/1918\_USA\_6\_(NA)  
 CY013273\_H1N1\_A/Hickox/1940\_USA\_6\_(NA)  
 CY009606\_H1N1\_A/Wilson-Smith/1933\_United\_Kingdom\_6\_(NA)  
 CY045774\_H1N1\_A/Melbourne/1/1946\_Australia\_6\_(NA)  
 CY020447\_H1N1\_A/Henry/1936\_USA\_6\_(NA)  
 CY006669\_H1N1\_A/New\_York/493/2003\_USA\_6\_(NA)  
 CY009342\_H1N1\_A/Malaysia/1954\_Malaysia\_6\_(NA)  
 CY010374\_H1N1\_A/USSR/90/1977\_Russia\_6\_(NA)  
 CY021039\_H1N1\_A/Christ's\_Hospital/157/1982\_United\_Kingdom\_6\_(NA)

TGTGGAACTTCAGGTACCTATGGAA  
 TGTGGCACTTCAGGTACTTATGGAA  
 TGTGGCACTTCAGGTACTTATGGAA  
 TGTGGCACTTCAGGTACCTATGGAA  
 TGTGGCACCTCAGGTACATATGGAA  
 TGTGGCACCTCAGGTACATATGGAA  
 TGTGGCACCTCAGGTACATATGGAA  
 TGTGGTGTAAACAGTGACACTGTGG  
 TGTGGTGTAAACAGTGACACTGTGG  
 TGTGGCGTGAACAGTGGCACTGCAA  
 TGTGGCGTAAATAGTGATACTGTAG  
 TGTGGTGTGAATAGTGATACTGTAG  
 TGTGGCGTGAATAGTGATACTGTAG  
 TGTGGCGTGAATAGTGATACTGTAG  
 TGTGGCGTGAATAGTGATACTGTAG  
 TGTGGCGTGAATAGTGATACTGTAA  
 TGTGGCGTGAATAGTGATACTGTAA  
 TGTGGCGTGAATAGTGATACTGTAA  
 TGTGGCGTGAATAGTGATACTGTAA

AJ404629\_H9N2\_A/Hong\_Kong/1073/99\_Hong\_Kong\_6\_(NA)  
CY087802\_H2N2\_A/Japan/305-MA12/1957\_Japan\_6\_(NA)  
CY032263\_H2N2\_A/Cottbus/1/1964\_Germany\_6\_(NA)  
CY080525\_H3N2\_A/Hong\_Kong/1-10-MA21-1/1968\_Hong\_Kong\_6\_(NA)  
CY118916\_H3N2\_A/Malaysia/1665090/2006\_Malaysia\_6\_(NA)  
CY113367\_H3N2\_A/Shanghai/11/1987\_China\_6\_(NA)  
CY112839\_H3N2\_A/Hong\_Kong/1/1997\_Hong\_Kong\_6\_(NA)  
JX046928\_H1N1\_A/Moscow/IIV-45/2012\_Russia\_6\_(NA)  
CY049989\_H1N1\_A/Mexico\_City/WR1087T/2009\_Mexico\_6\_(NA)  
GQ132138.1|\_H1N1\_A/Mexico/InDRE4114/2009  
CY021959\_H1N1\_A/New\_Jersey/1976\_USA\_6\_(NA)  
AF250356\_H1N1\_A/Brevig\_Mission/1/1918\_USA\_6\_(NA)  
CY013273\_H1N1\_A/Hickox/1940\_USA\_6\_(NA)  
CY009606\_H1N1\_A/Wilson-Smith/1933\_United\_Kingdom\_6\_(NA)  
CY045774\_H1N1\_A/Melbourne/1/1946\_Australia\_6\_(NA)  
CY020447\_H1N1\_A/Henry/1936\_USA\_6\_(NA)  
CY006669\_H1N1\_A/New\_York/493/2003\_USA\_6\_(NA)  
CY009342\_H1N1\_A/Malaysia/1954\_Malaysia\_6\_(NA)  
CY010374\_H1N1\_A/USSR/90/1977\_Russia\_6\_(NA)  
CY021039\_H1N1\_A/Christ's\_Hospital/157/1982\_United\_Kingdom\_6\_(NA)

CAGGCTCATGGCCTGATGGAGCGAA  
CAGGCTCATGGCCTGATGGGGCGAA  
CAGGCTCATGGCCTGATGGGGCGAA  
CAGGCTCATGGCCTGATGGGGCGAA  
CAGGCTCATGGCCTGATGGGGCGA  
CAGGCTCATGGCCTGATGGGGCGA  
CAGGCTCATGGCCTGATGGGGCGA  
GTTGGTCTTGGCCAGACGGTGCTGA  
GTTGGTCTTGGCCAGACGGTGCTGA  
GTTGGTCTTGGCCAGACGGTGCTGA  
GTTGGTCTTGGCCAGACGGTGCTGA  
GTTGGTCTTGGCCAGACGGTGCTGA  
ATTGGTCTTGGCCAGACGGTGCCGA  
ATTGGTCTTGGCCAGACGGTGCTGA  
ATTGGTCTTGGCCAGACGGTGCTGA  
ATTGGTCTTGGCCAGACGGTGCTGA  
ATTGGTCTTGGCCAGACGGTGCCGA  
ATTGGTCTTGGCCAGACGGTGCCGA  
ATTGGTCTTGGCCAGACGGTGCCGA  
ATTGGTCTTGGCCAGACGGTGCCGA

AJ404629\_H9N2\_A/Hong\_Kong/1073/99\_Hong\_Kong\_6\_(NA)  
CY087802\_H2N2\_A/Japan/305-MA12/1957\_Japan\_6\_(NA)  
CY032263\_H2N2\_A/Cottbus/1/1964\_Germany\_6\_(NA)  
CY080525\_H3N2\_A/Hong\_Kong/1-10-MA21-1/1968\_Hong\_Kong\_6\_(NA)  
CY118916\_H3N2\_A/Malaysia/1665090/2006\_Malaysia\_6\_(NA)  
CY113367\_H3N2\_A/Shanghai/11/1987\_China\_6\_(NA)  
CY112839\_H3N2\_A/Hong\_Kong/1/1997\_Hong\_Kong\_6\_(NA)  
JX046928\_H1N1\_A/Moscow/IIV-45/2012\_Russia\_6\_(NA)  
CY049989\_H1N1\_A/Mexico\_City/WR1087T/2009\_Mexico\_6\_(NA)  
GQ132138.1|\_H1N1\_A/Mexico/InDRE4114/2009  
CY021959\_H1N1\_A/New\_Jersey/1976\_USA\_6\_(NA)  
AF250356\_H1N1\_A/Brevig\_Mission/1/1918\_USA\_6\_(NA)  
CY013273\_H1N1\_A/Hickox/1940\_USA\_6\_(NA)  
CY009606\_H1N1\_A/Wilson-Smith/1933\_United\_Kingdom\_6\_(NA)  
CY045774\_H1N1\_A/Melbourne/1/1946\_Australia\_6\_(NA)  
CY020447\_H1N1\_A/Henry/1936\_USA\_6\_(NA)  
CY006669\_H1N1\_A/New\_York/493/2003\_USA\_6\_(NA)  
CY009342\_H1N1\_A/Malaysia/1954\_Malaysia\_6\_(NA)  
CY010374\_H1N1\_A/USSR/90/1977\_Russia\_6\_(NA)  
CY021039\_H1N1\_A/Christ's\_Hospital/157/1982\_United\_Kingdom\_6\_(NA)

TATCAATTTTCATGCTATATAAGCT  
CATCAATTTTCATGCCATATAAGCT  
CATCAATTTTCATGCCATATAAGCT  
CATCAATTTTCATGCCATATAAGCT  
CATCAATTCATGCCATATAAGCT  
CATCAATCTCATGCCATATAAGCT  
CATCAATCTCATGCCATATAAGCT  
GTTGCCATTTCAC-CATTGACAAG--  
GTTGCCATTTCAC-CATTGACAAG--  
GTTGCCATTTCAC-CATTGACAAG--  
TCTGCCATTTCAC-CATTGACAAG--  
GTTGCCATTTCAC-CATTGACAAG--  
GTTGCCATTTCAC-CATTGACAAG--  
GTTGCCATTTCAC-CATTGACAAG--  
GTTGCCATTTCAC-CATTGACAAG--  
GTTGCCATTTCAC-CATTGACAAG--  
GTTGCCATTTCAC-AAATTGACAAG--  
GTTGCCATTTCAC-CATTGACAAG--  
GTTGCCATTTCAC-CATTGACAAG--

AJ404629\_H9N2\_A/Hong\_Kong/1073/99\_Hong\_Kong\_6\_(NA)  
CY087802\_H2N2\_A/Japan/305-MA12/1957\_Japan\_6\_(NA)  
CY032263\_H2N2\_A/Cottbus/1/1964\_Germany\_6\_(NA)  
CY080525\_H3N2\_A/Hong\_Kong/1-10-MA21-1/1968\_Hong\_Kong\_6\_(NA)  
CY118916\_H3N2\_A/Malaysia/1665090/2006\_Malaysia\_6\_(NA)  
CY113367\_H3N2\_A/Shanghai/11/1987\_China\_6\_(NA)  
CY112839\_H3N2\_A/Hong\_Kong/1/1997\_Hong\_Kong\_6\_(NA)  
JX046928\_H1N1\_A/Moscow/IIV-45/2012\_Russia\_6\_(NA)  
CY049989\_H1N1\_A/Mexico\_City/WR1087T/2009\_Mexico\_6\_(NA)  
GQ132138.1|\_H1N1\_A/Mexico/InDRE4114/2009  
CY021959\_H1N1\_A/New\_Jersey/1976\_USA\_6\_(NA)  
AF250356\_H1N1\_A/Brevig\_Mission/1/1918\_USA\_6\_(NA)  
CY013273\_H1N1\_A/Hickox/1940\_USA\_6\_(NA)  
CY009606\_H1N1\_A/Wilson-Smith/1933\_United\_Kingdom\_6\_(NA)  
CY045774\_H1N1\_A/Melbourne/1/1946\_Australia\_6\_(NA)  
CY020447\_H1N1\_A/Henry/1936\_USA\_6\_(NA)  
CY006669\_H1N1\_A/New\_York/493/2003\_USA\_6\_(NA)  
CY009342\_H1N1\_A/Malaysia/1954\_Malaysia\_6\_(NA)  
CY010374\_H1N1\_A/USSR/90/1977\_Russia\_6\_(NA)  
CY021039\_H1N1\_A/Christ's\_Hospital/157/1982\_United\_Kingdom\_6\_(NA)

Sequence logo visualization showing the probability of nucleotides (A, C, G, T) at each position. The y-axis represents the probability (0.0 to 0.4), and the x-axis represents the position (1 to 8). The logo highlights the conserved regions and the specific nucleotide preferences at each position.

| Position | A    | C    | G    | T    |
|----------|------|------|------|------|
| 1        | 0.00 | 0.00 | 0.00 | 0.40 |
| 2        | 0.00 | 0.00 | 0.00 | 0.40 |
| 3        | 0.00 | 0.00 | 0.00 | 0.40 |
| 4        | 0.00 | 0.00 | 0.00 | 0.40 |
| 5        | 0.40 | 0.00 | 0.00 | 0.00 |
| 6        | 0.00 | 0.00 | 0.40 | 0.00 |
| 7        | 0.00 | 0.20 | 0.20 | 0.20 |
| 8        | 0.00 | 0.20 | 0.20 | 0.20 |
