# Supplementary material
Source: MDPI journal article supplement (https://www.mdpi.com/1099-4300/15/8/3065)

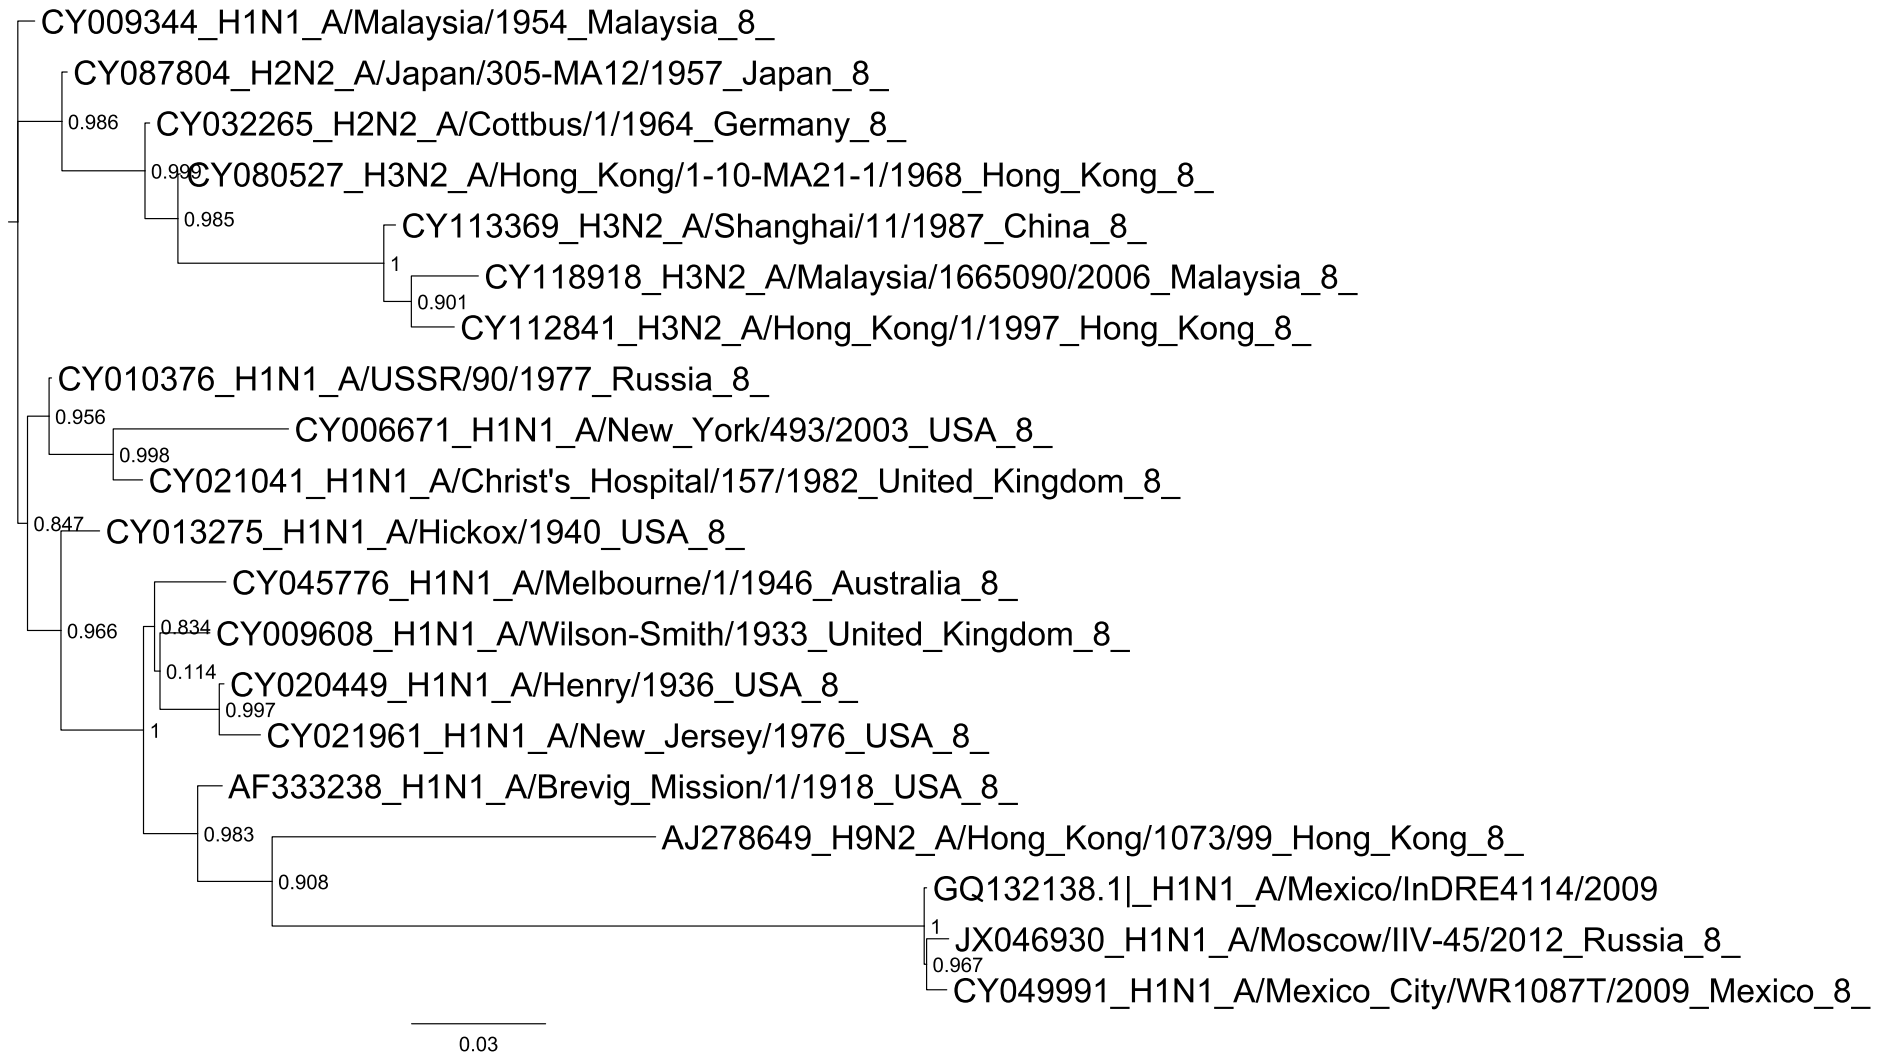

Supplement: s1 [file s1]

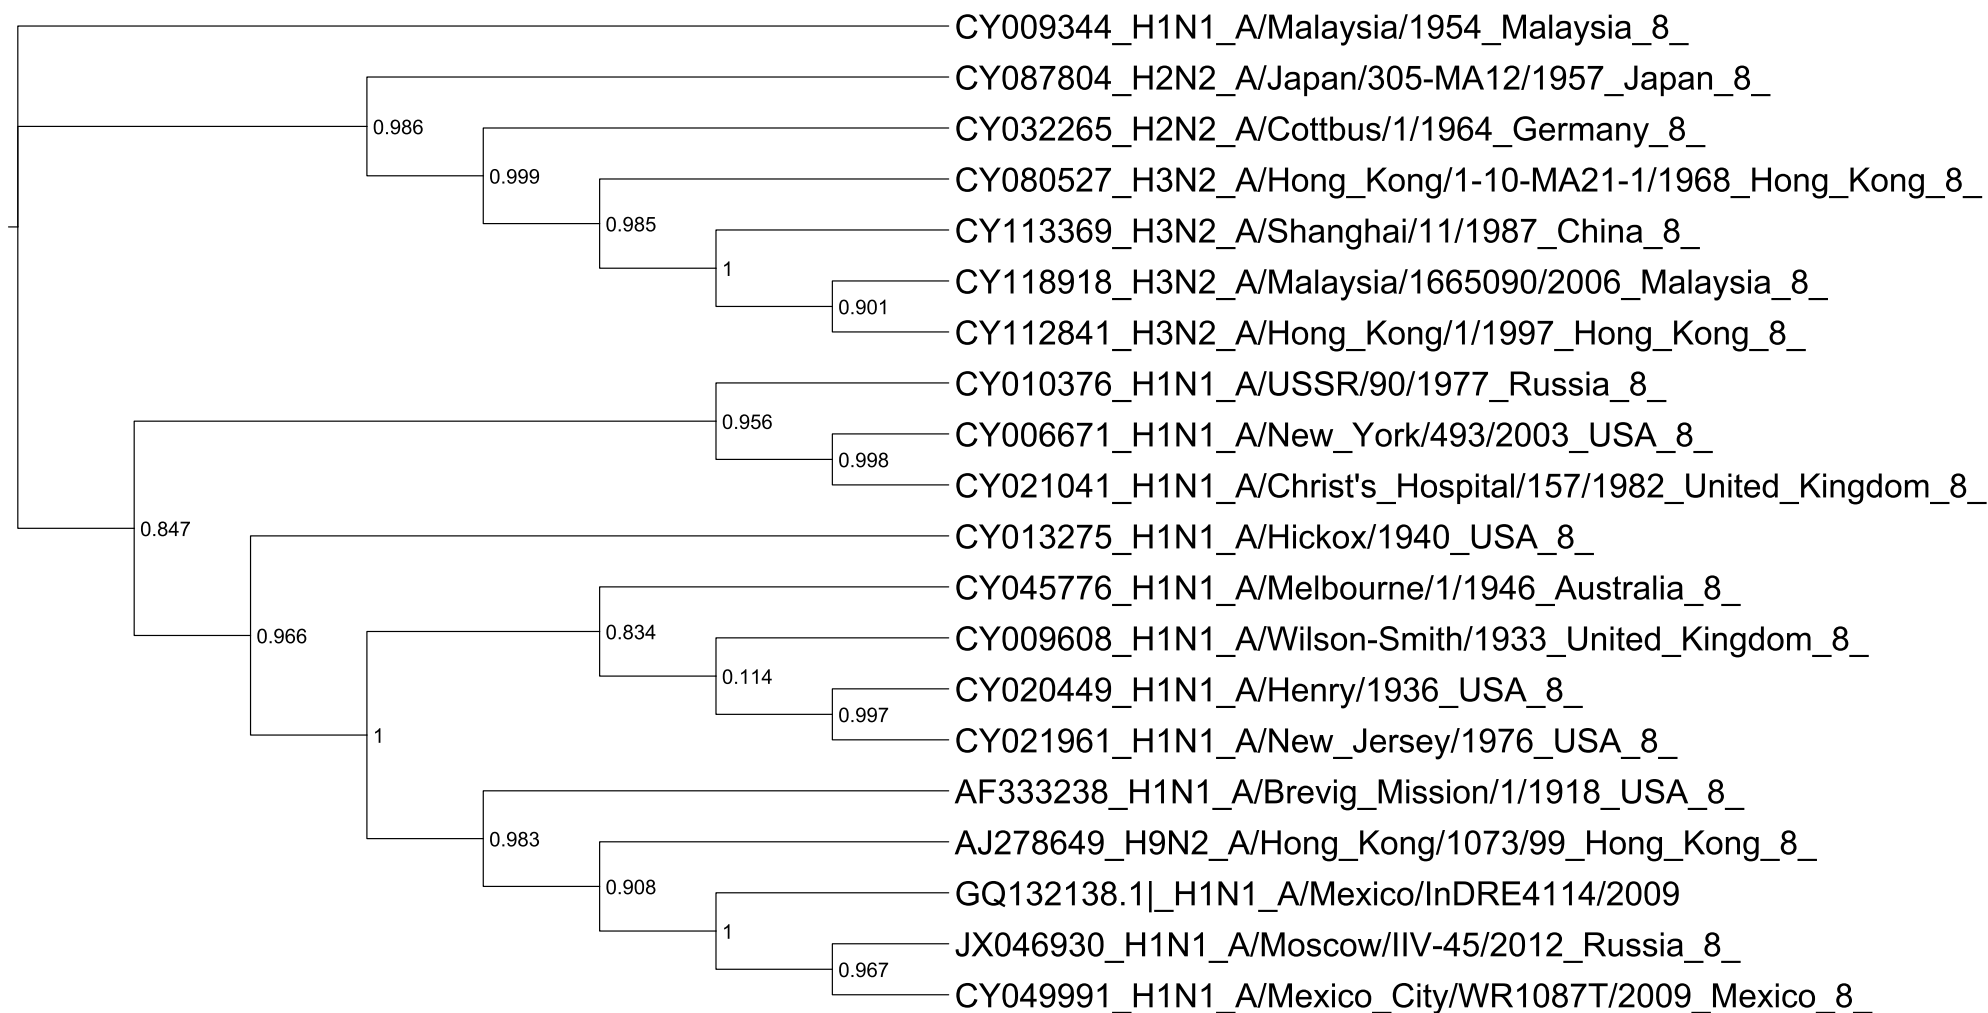

0.03

Supplement: s1 [file s1]

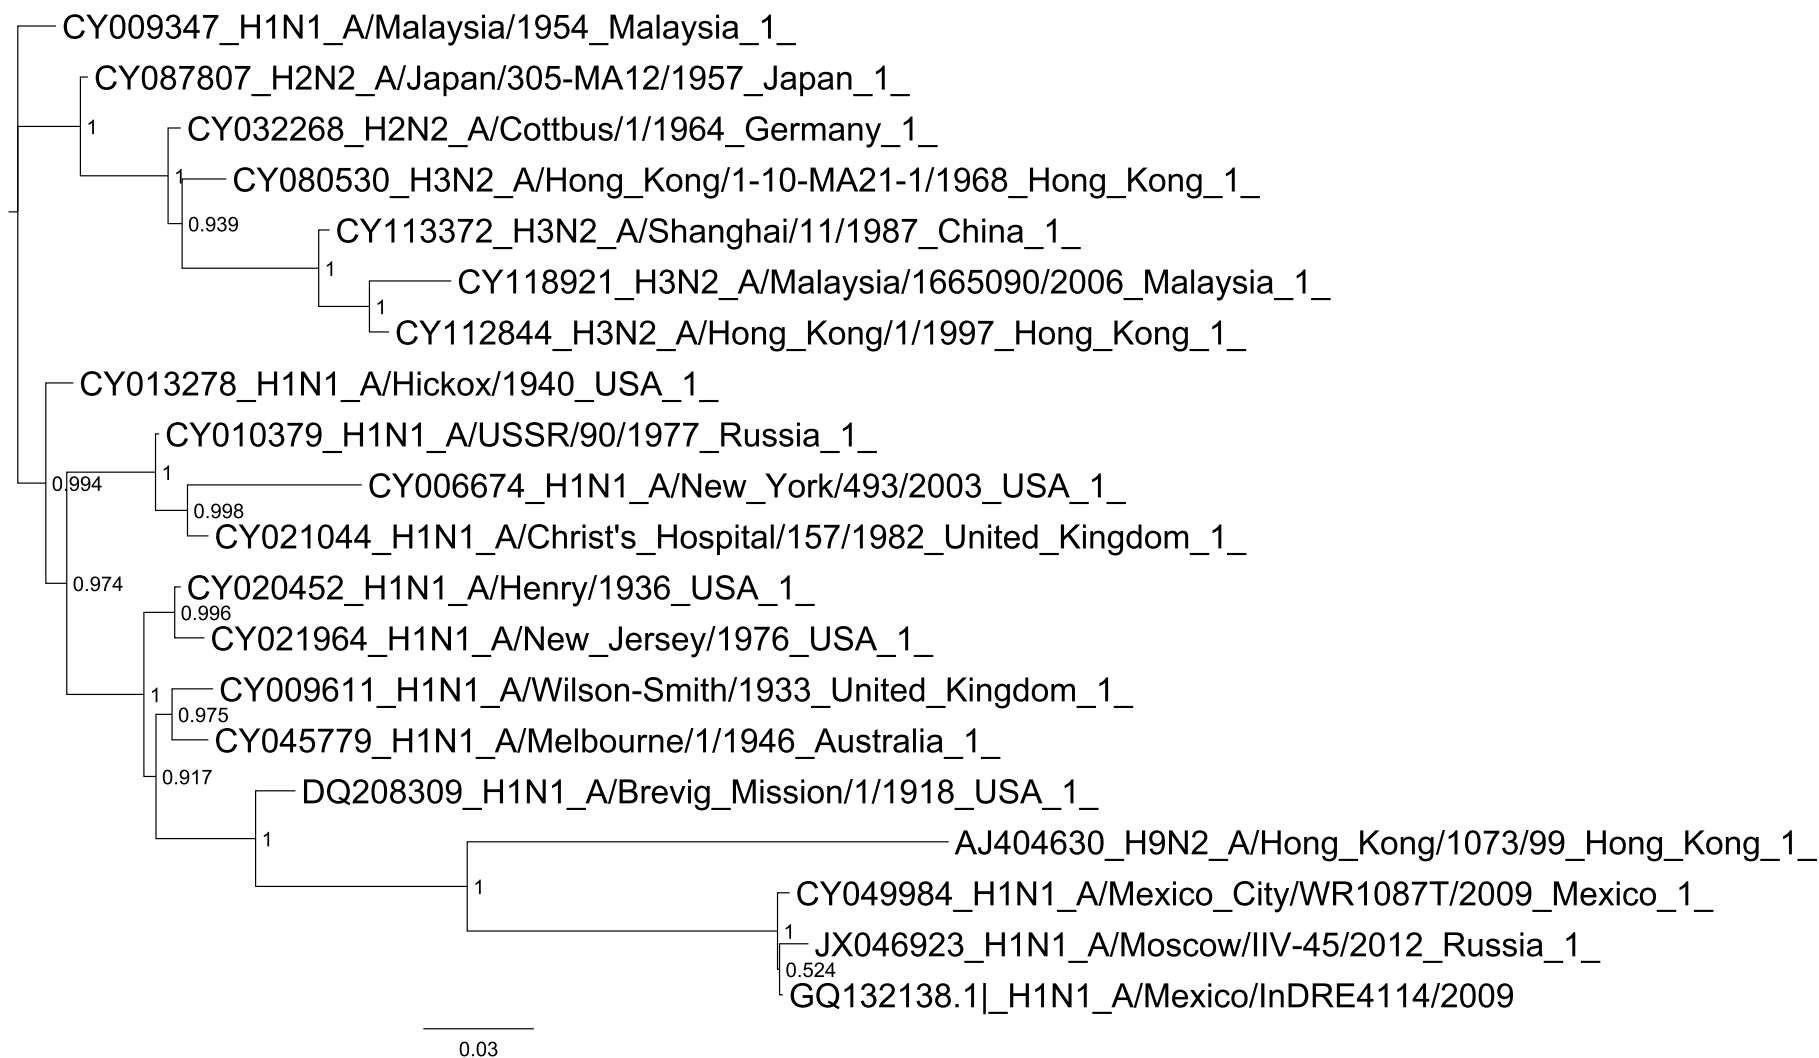

Supplement: s1 [file s1]

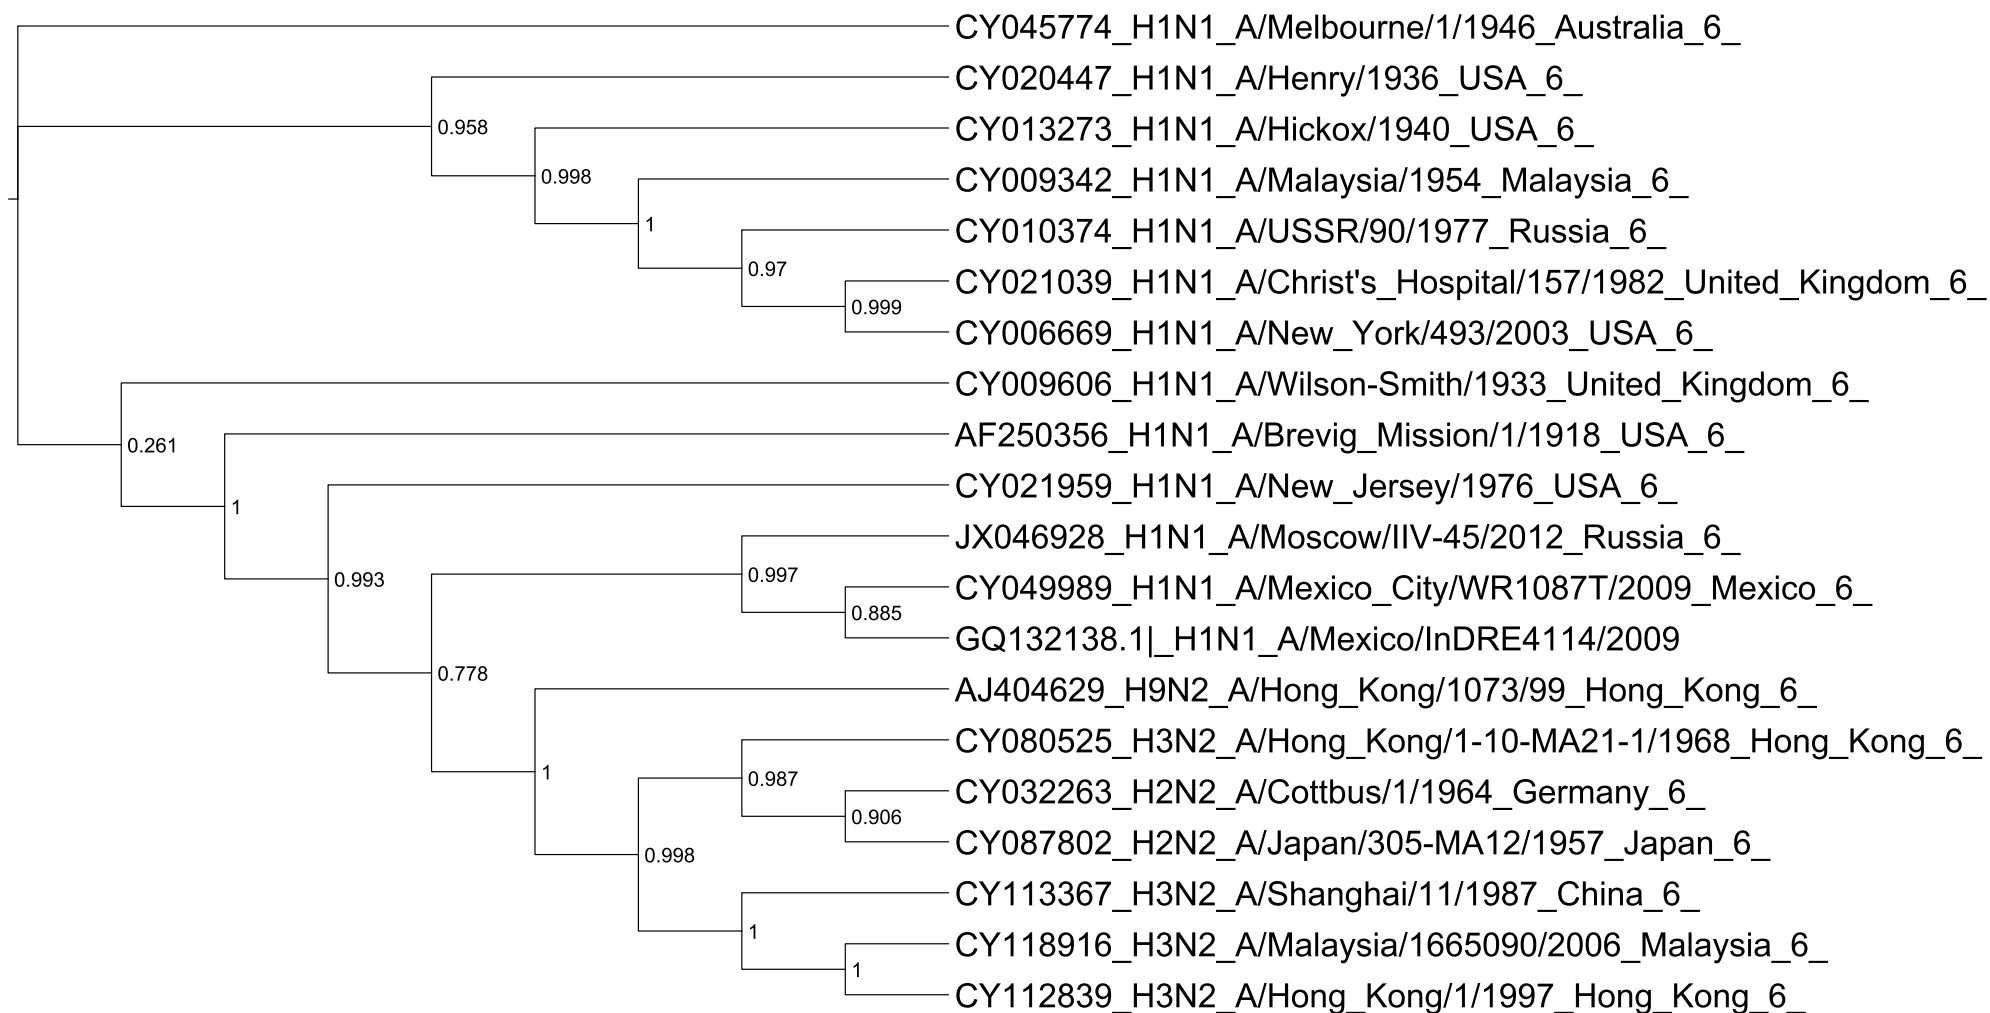

—  
0.2

Supplement: s1 [file s1]

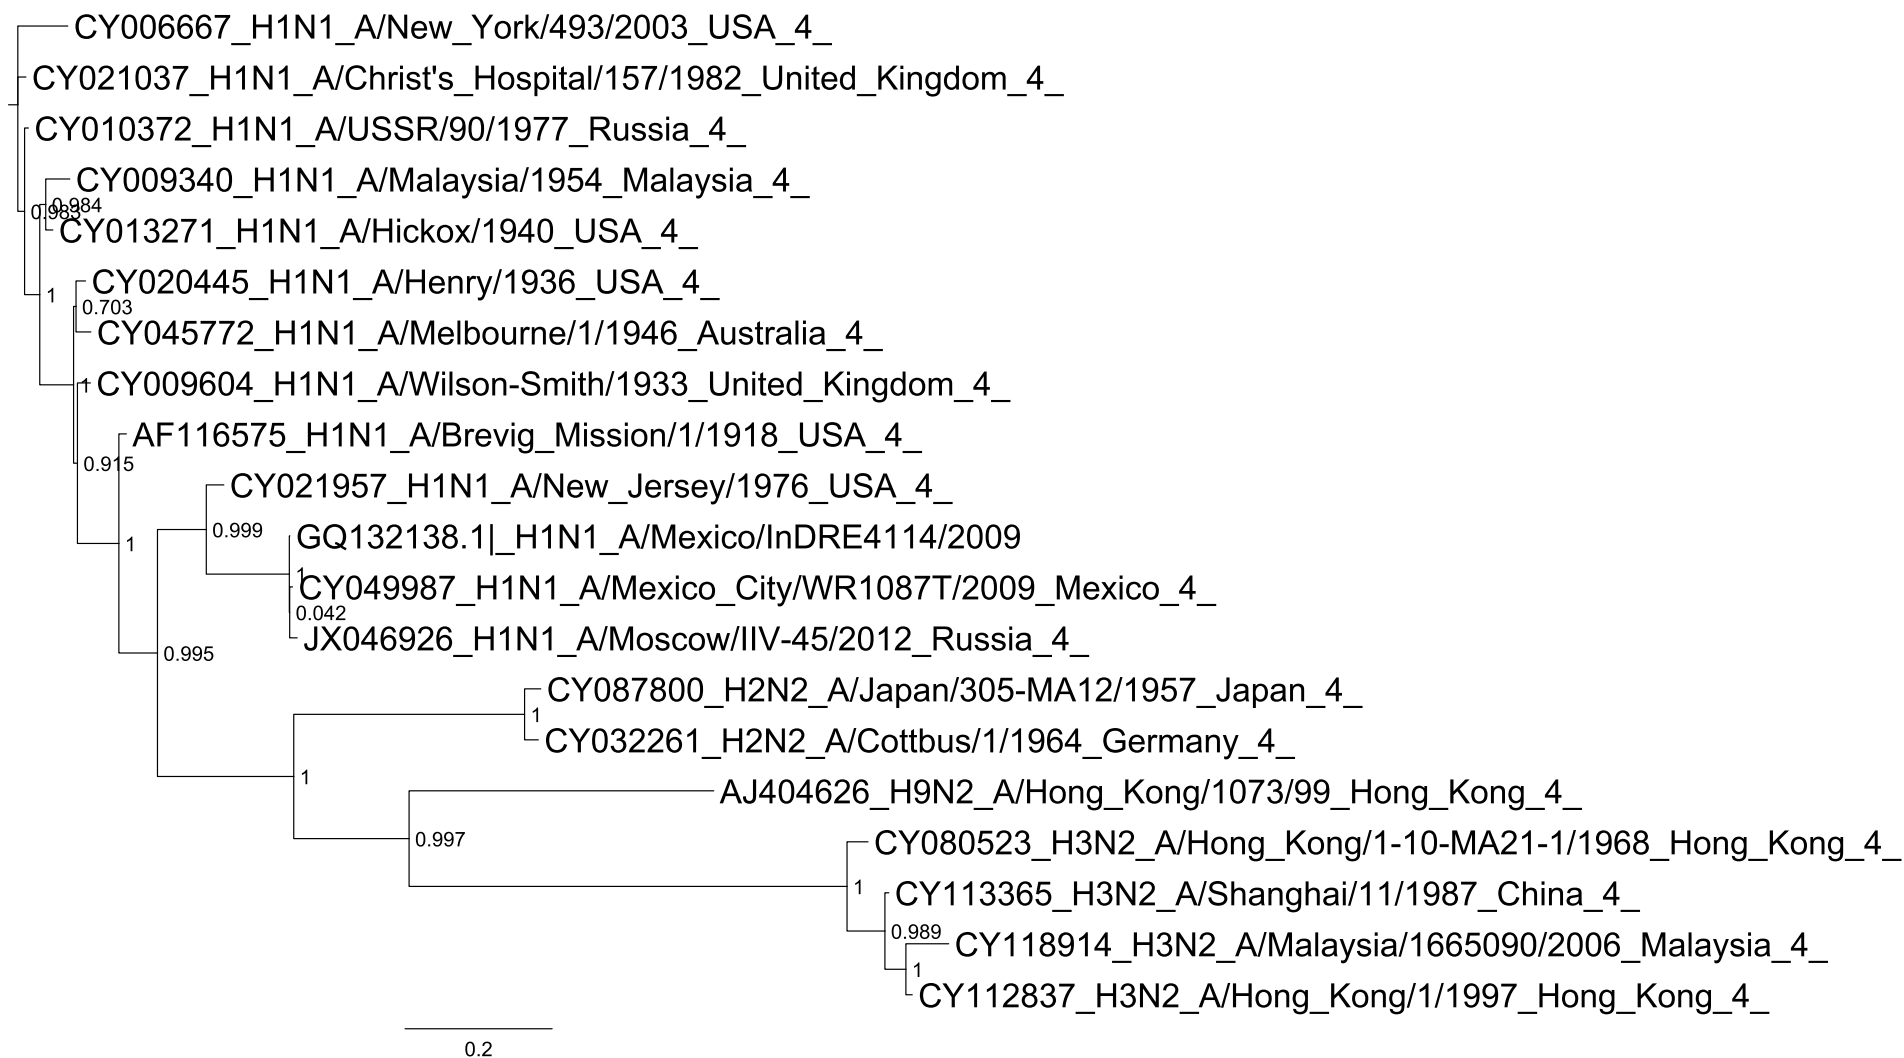

Supplement: s1 [file s1]

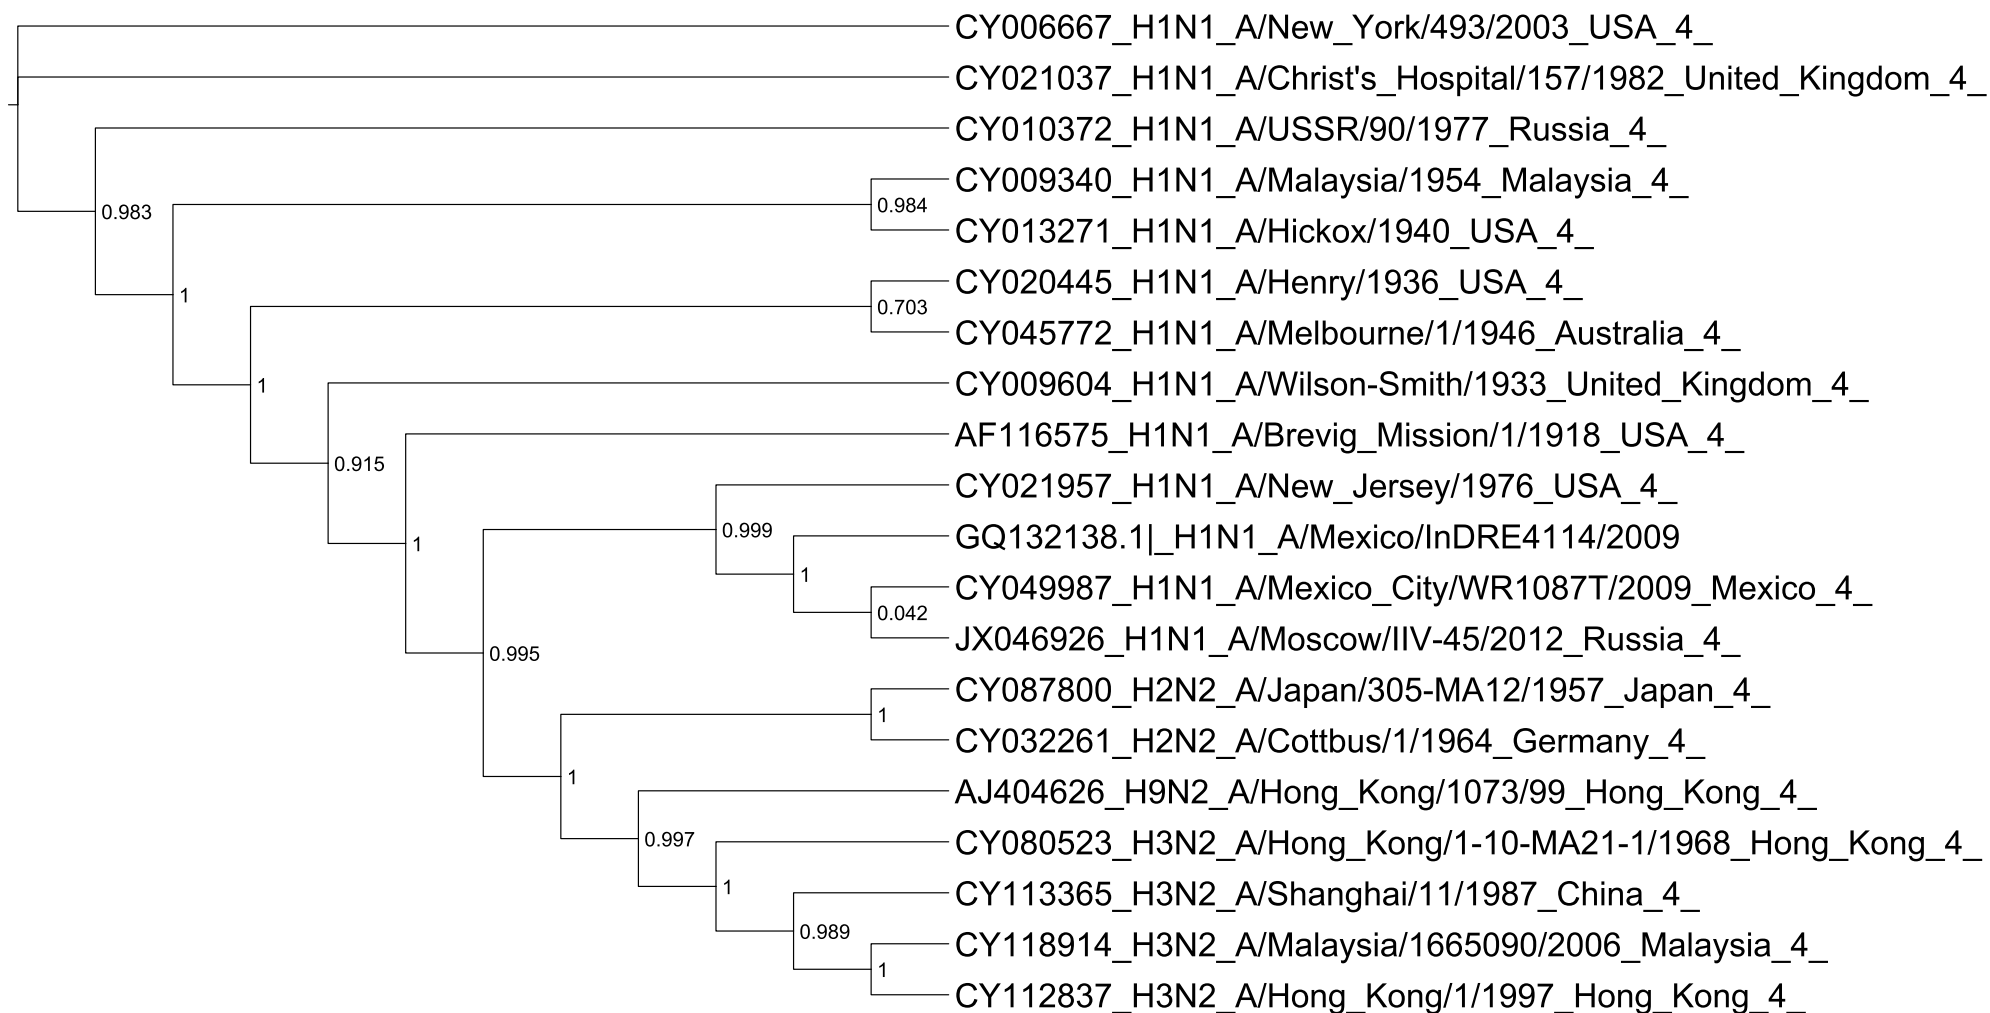

0.2

Supplement: s1 [file s1]

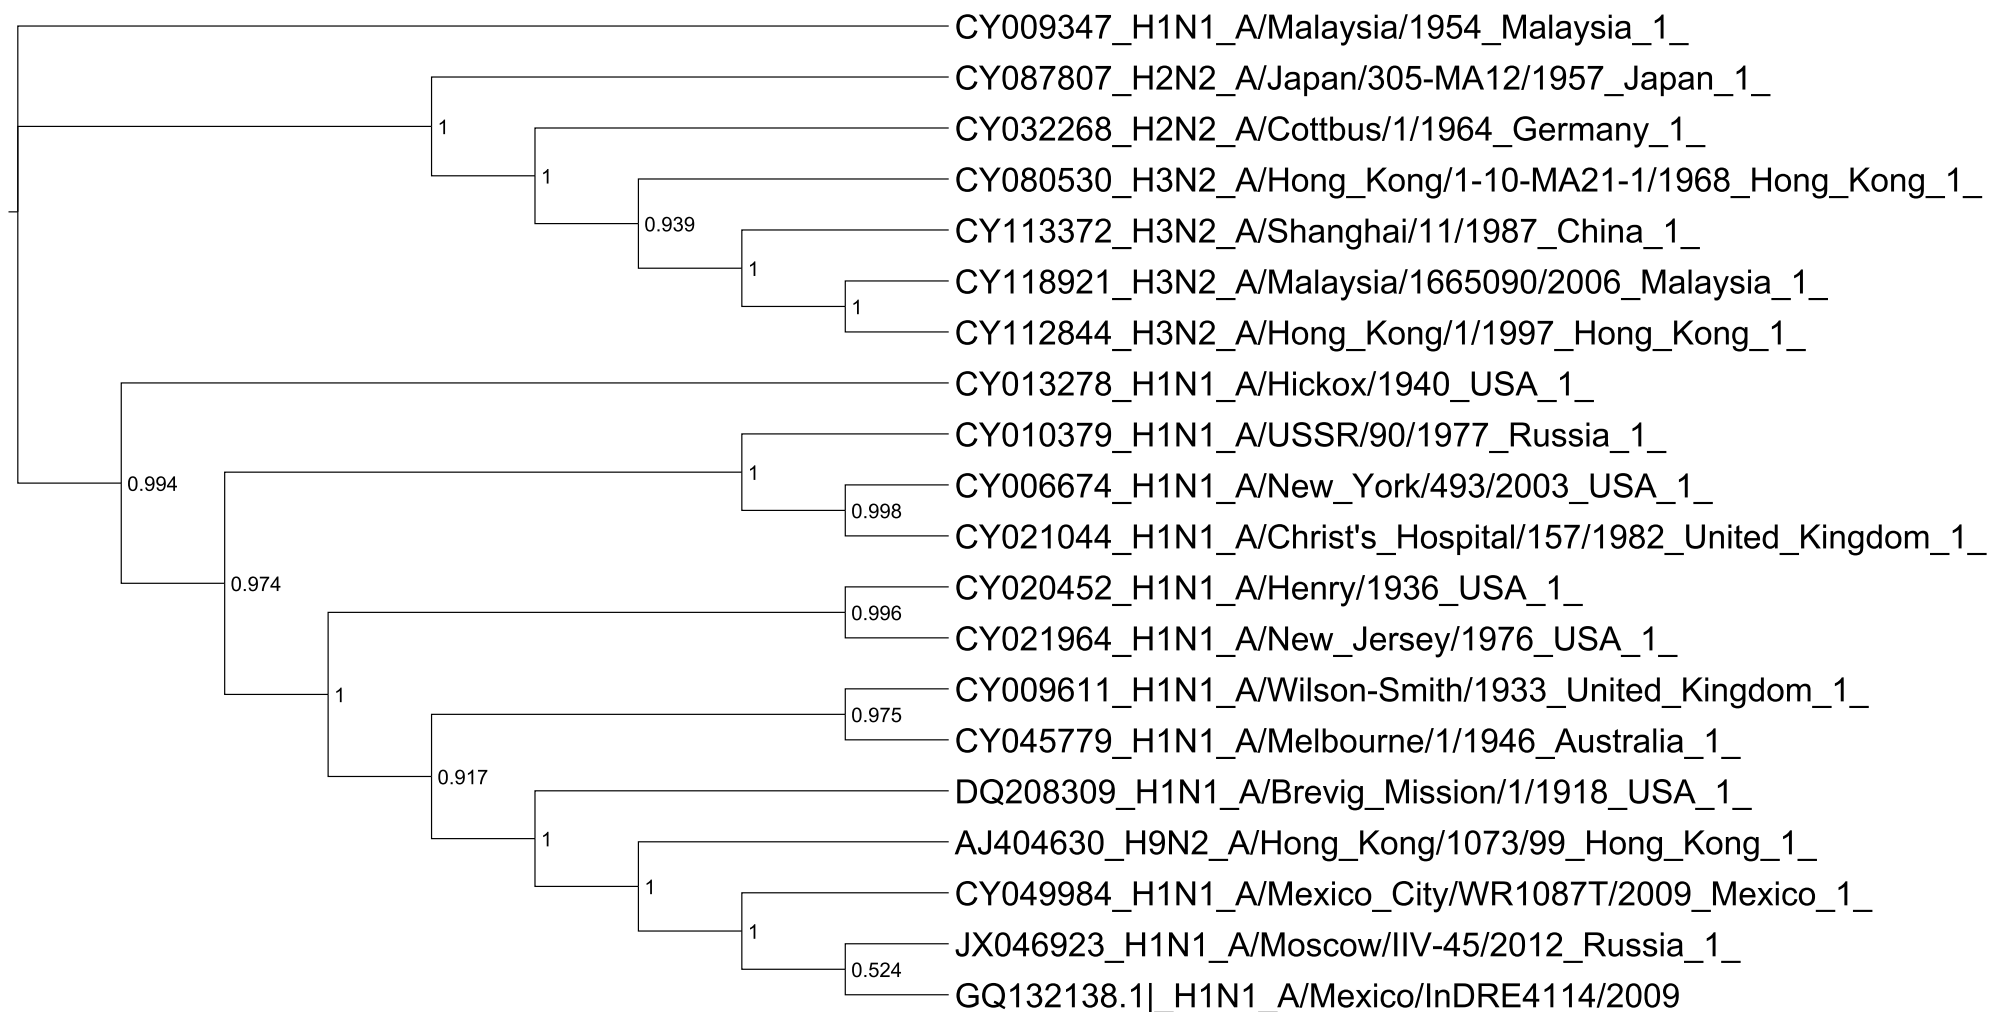

0.03

Supplement: s1 [file s1]

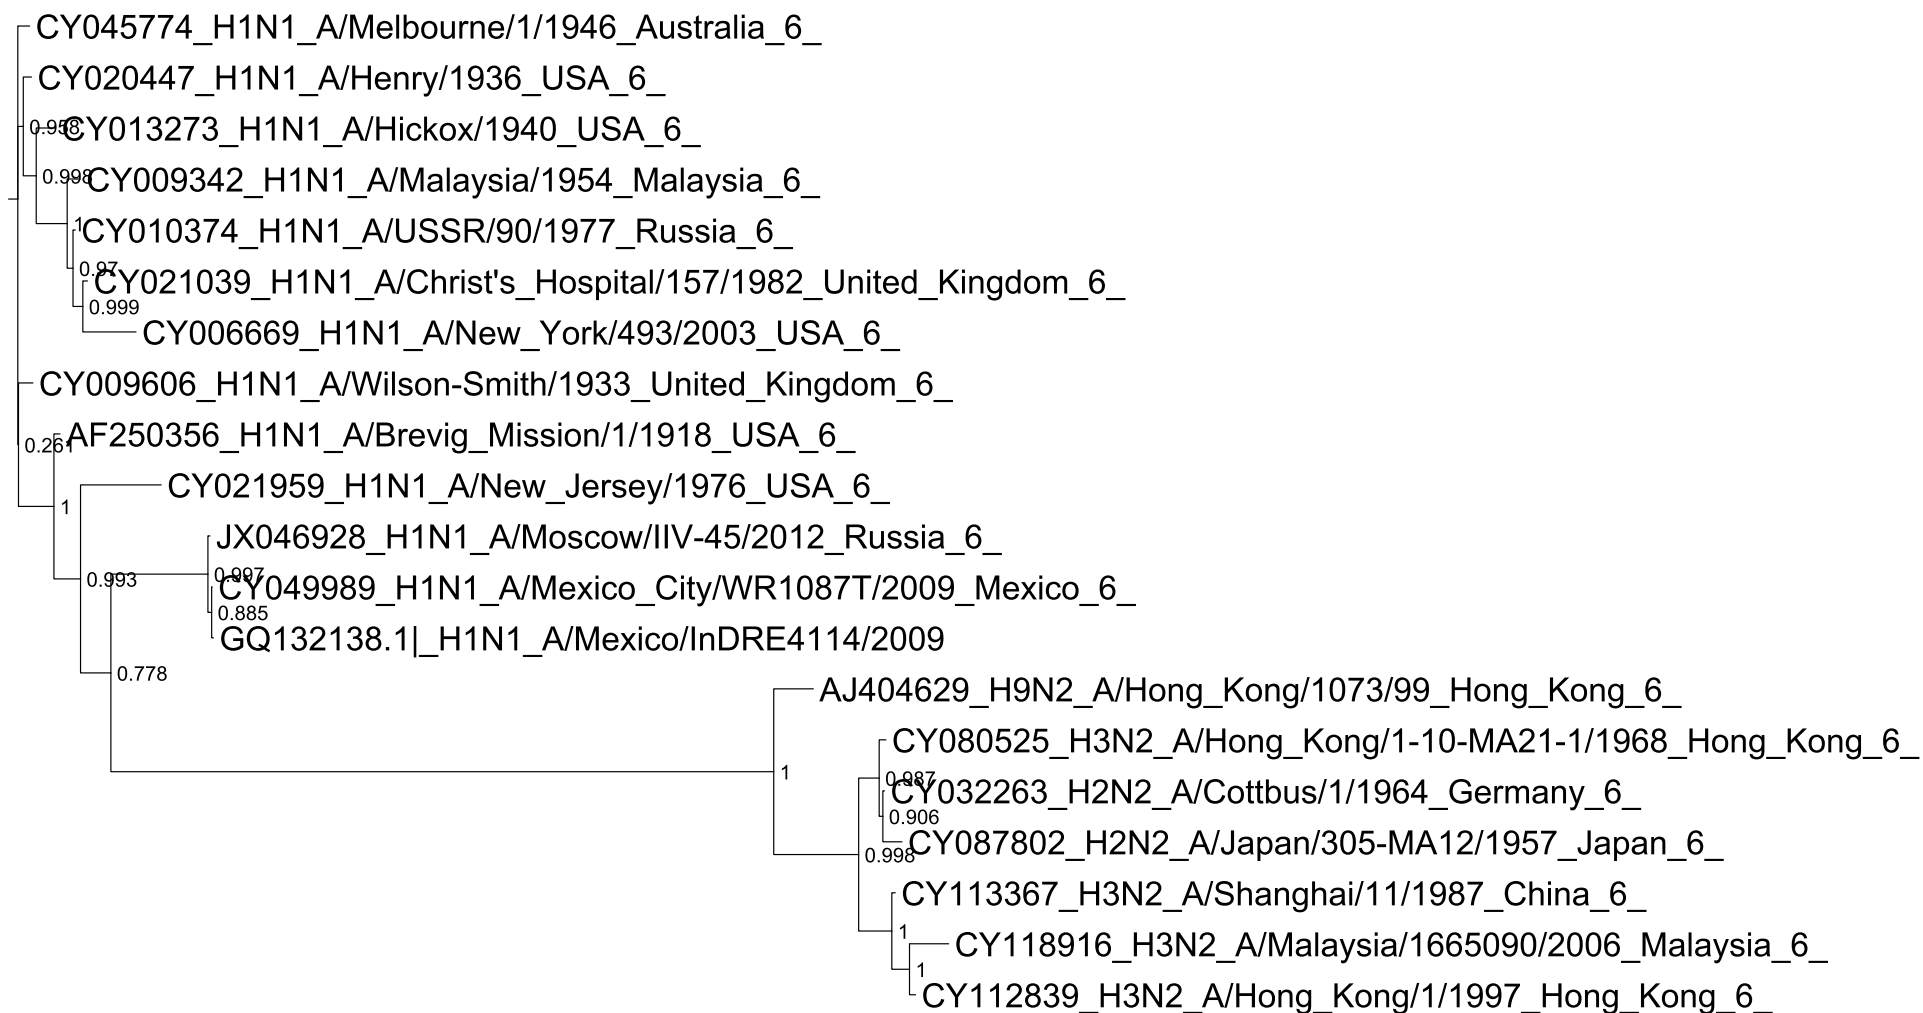

0.2

Supplement: s1 [file s1]
